# Supplementary material
Source: publisher figshare collection journal article supplement (https://acs.figshare.com/ndownloader/files/4132219)

# The Intramolecular Allenolate Rauhut-Currier Reaction

*James A. MacKay,\* Zachary C. Landis, Stephen E. Motika, and Margaret H. Kench*

Department of Chemistry and Biochemistry, Elizabethtown College, Elizabethtown PA 17022

[mackayj@etown.edu](mailto:mackayj@etown.edu)

## Supporting Information Table of Contents

**General Experimental .....S1-S2**

**Additional References for SI..... S2**

**<sup>1</sup>H and <sup>13</sup>C NMR of New Compounds .....S3-S58**

## General Experimental

Unless otherwise specified, solvents were degassed by purging with nitrogen and dried over activated alumina. Triethylamine (NEt<sub>3</sub>) and benzene (C<sub>6</sub>H<sub>6</sub>) were distilled from CaH<sub>2</sub>. Organolithium reagents were titrated prior to use either with diphenylacetic acid or 1,10-phenanthroline/*iso*-butyl alcohol in the reaction solvent. **3a** and **3c** were commercially available. **3b**,<sup>1</sup> **4a**,<sup>2</sup> **4c**,<sup>2</sup> **5**,<sup>3</sup> **6b**<sup>3</sup> were readily available from known procedures. All reactions were performed in flame or oven-dried glassware under a nitrogen atmosphere.

Solvents used in reactions involving phosphines were degassed either by refluxing and distillation under N<sub>2</sub>, purging with N<sub>2</sub> for 30 min, or via three freeze/pump/thaw cycles. In addition, distillation of TMSCN (bulb-to-bulb) and CH<sub>3</sub>CN (over CaH) immediately prior to cyclization reactions produced the best results. For all cyclization reactions, no other products were isolated but the formation of immobile highly polar bands on TLC alluded to the formation of oligomeric byproducts.

Analytical thin-layer chromatography (tlc) was run on Whatman 0.25 mm K6F silica gel 60Å plates and visualized with the aid of UV light, iodine vapor, KMnO<sub>4</sub> or PMA stain. Manual flash chromatography was run using Whatman Silica Gel; Purasil 60 Å (230-400 mesh) or in automation using Silica RediSepR<sub>f</sub> High Performance Gold disposable columns and a hexanes/ethyl acetate eluent. Mass spectra were obtained using positive electrospray ionization and FTICR mass analyzer.

#### **Additional References for SI**

1. Rank, E.; Bruckner, R. *Eur. J. Org. Chem.* **1998**, 1045.
2. Marino, J. P.; Nguyen, H. N. *J. Org. Chem.* **2002**, 67, 6291.
3. Magnus, P.; Principe, L. M.; Slater, M. J. *J. Org. Chem.* **1987**, 52, 1483.

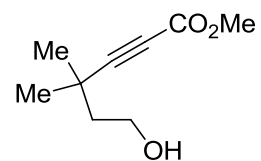

**Methyl 6-hydroxy-4,4-dimethylhex-2-ynoate (4b)**

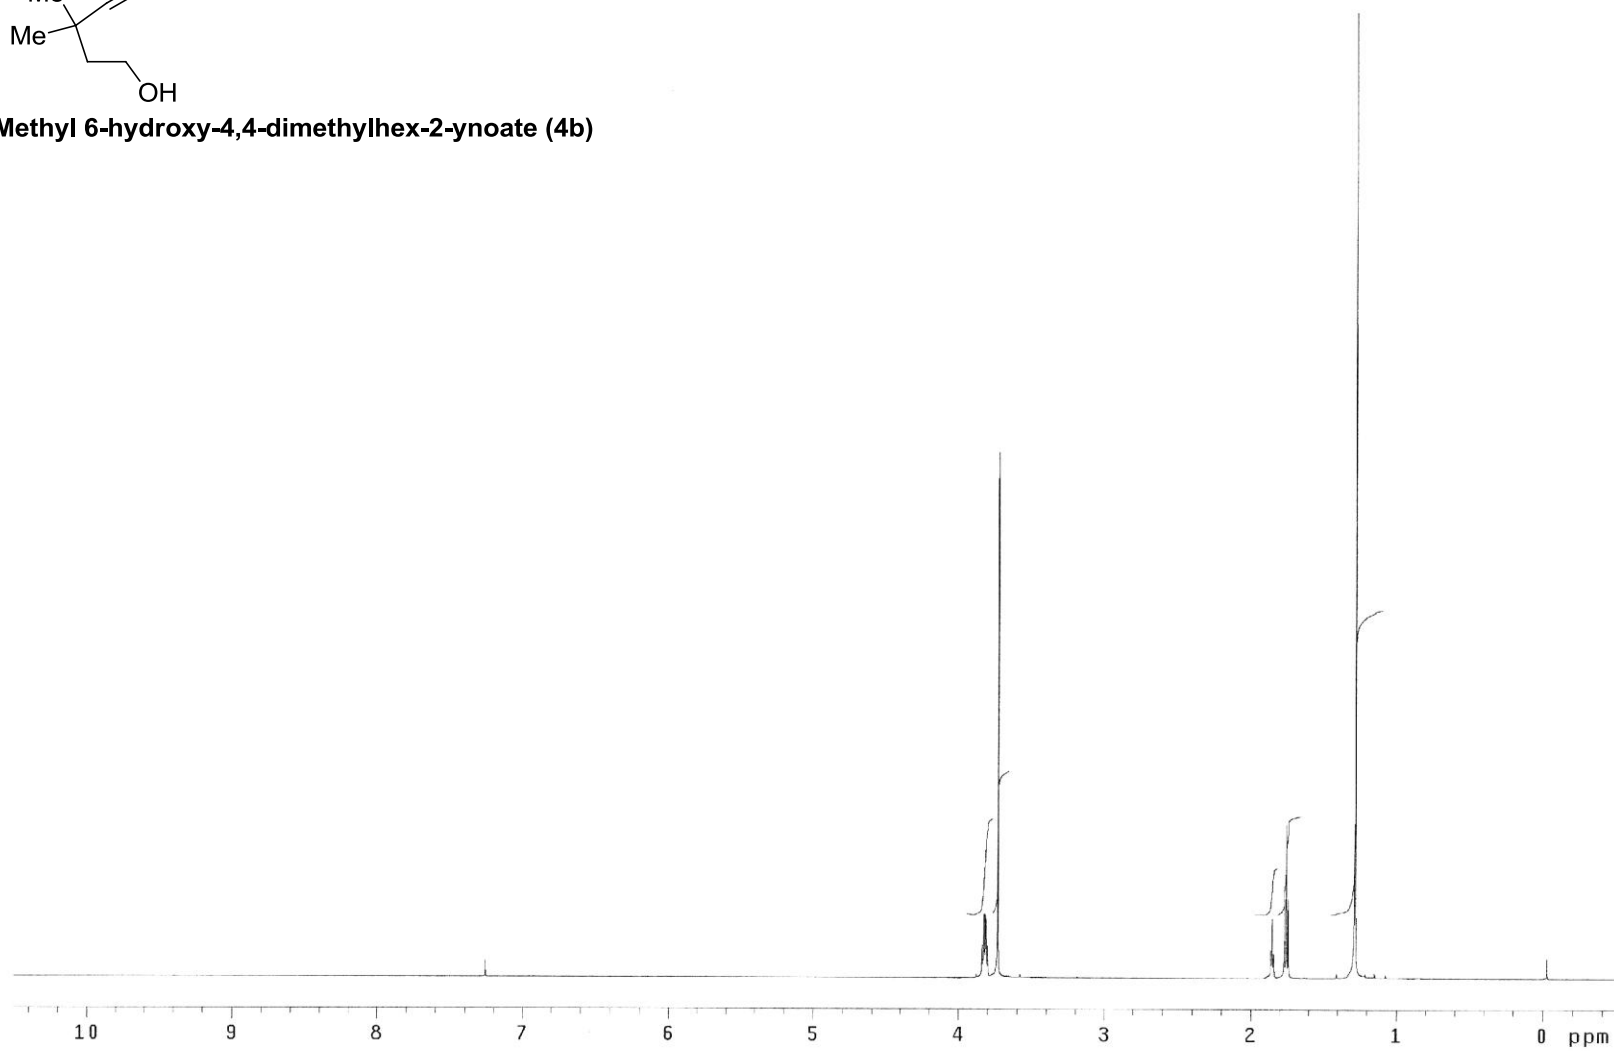

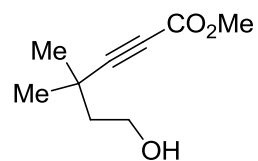

**Methyl 6-hydroxy-4,4-dimethylhex-2-ynoate (4b)**

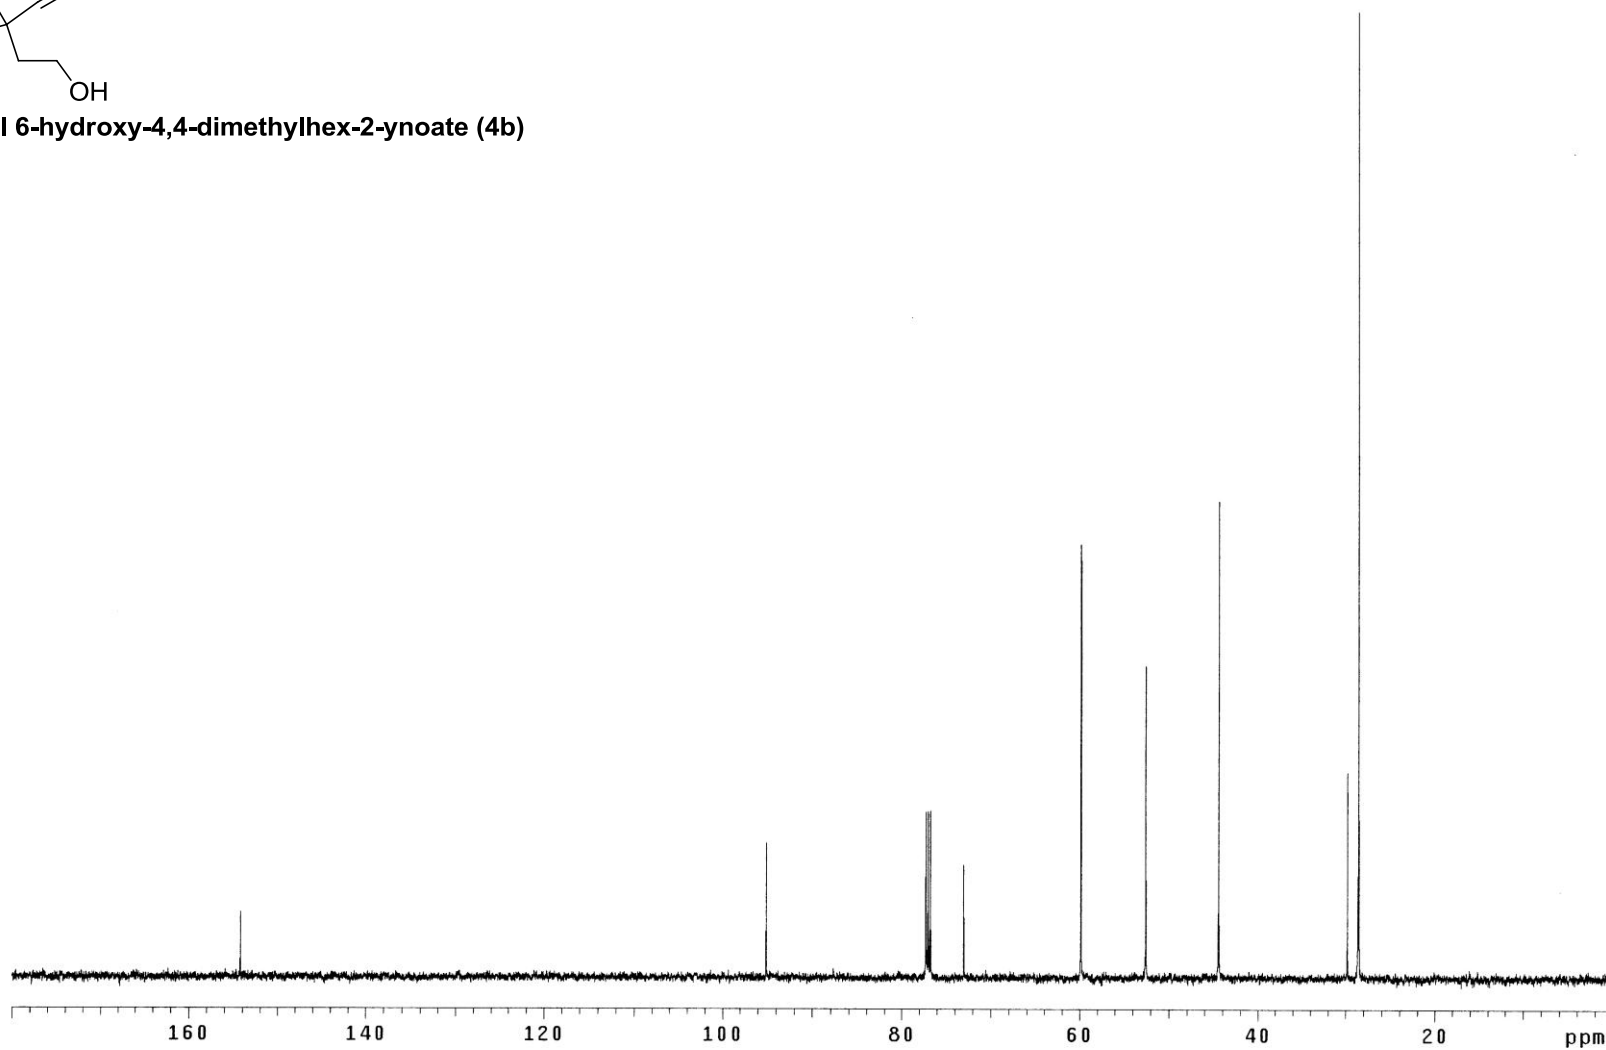

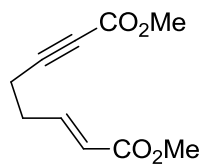

**(E)-Methyl Oct-2-en-6-ynedioate (1a)**

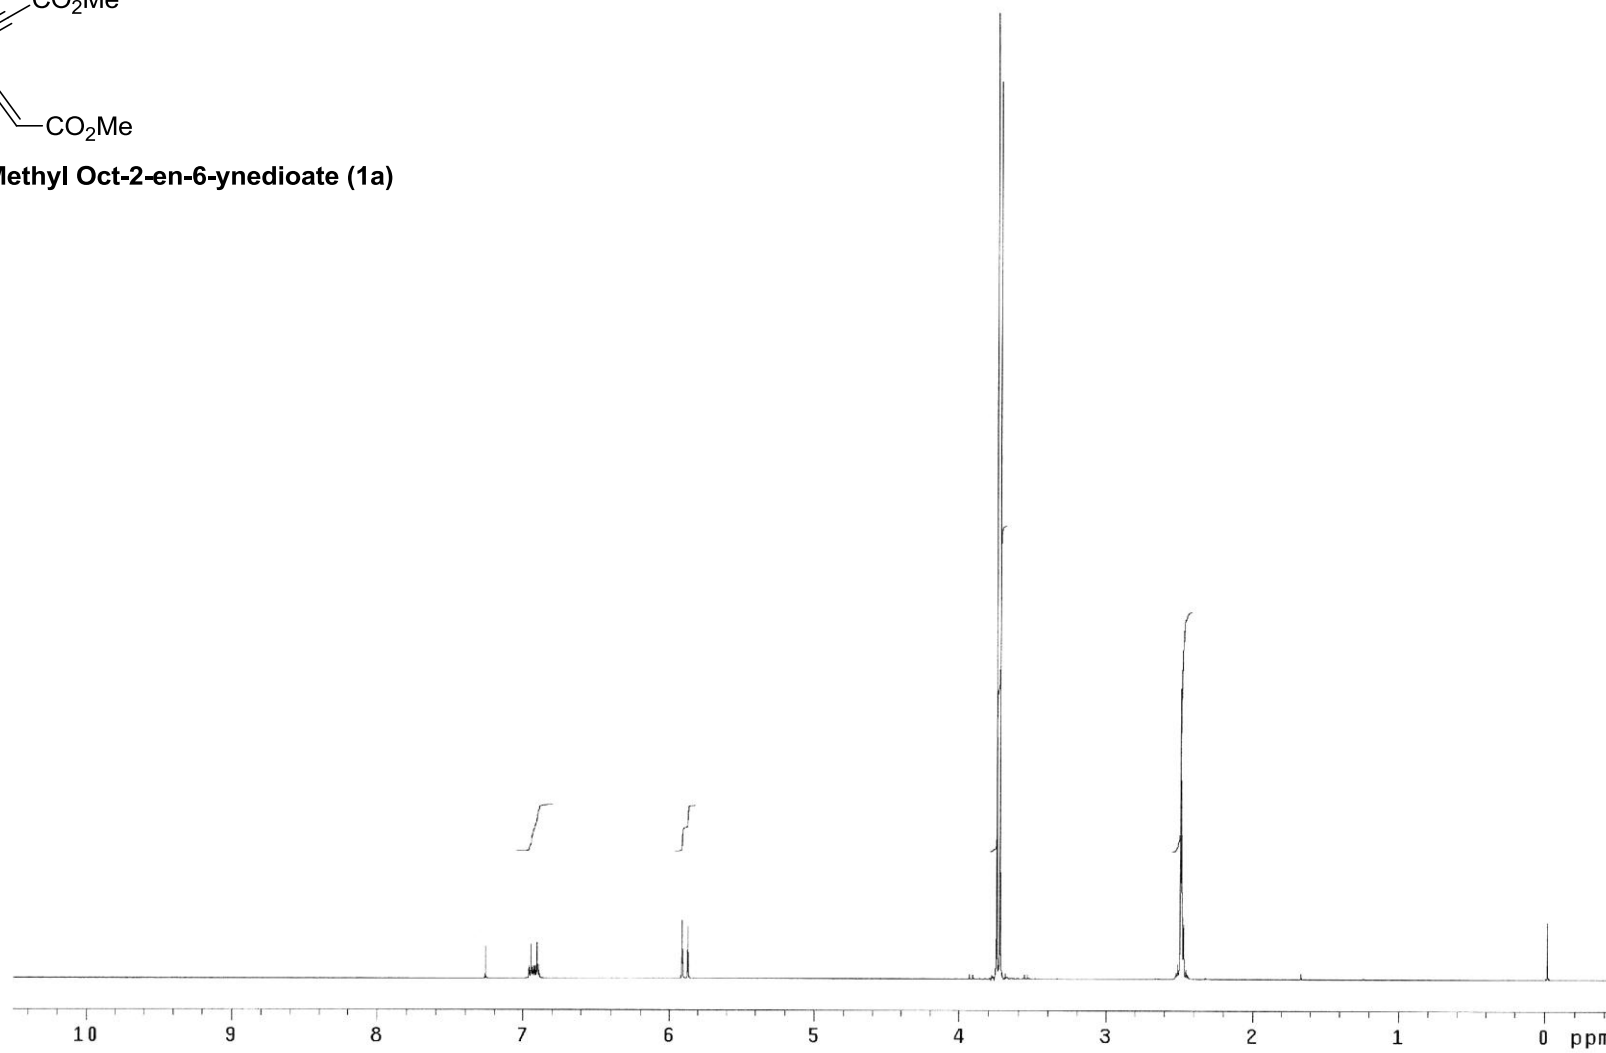

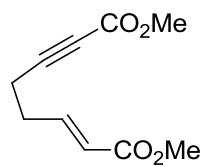

**(E)-Methyl Oct-2-en-6-ynedioate (1a)**

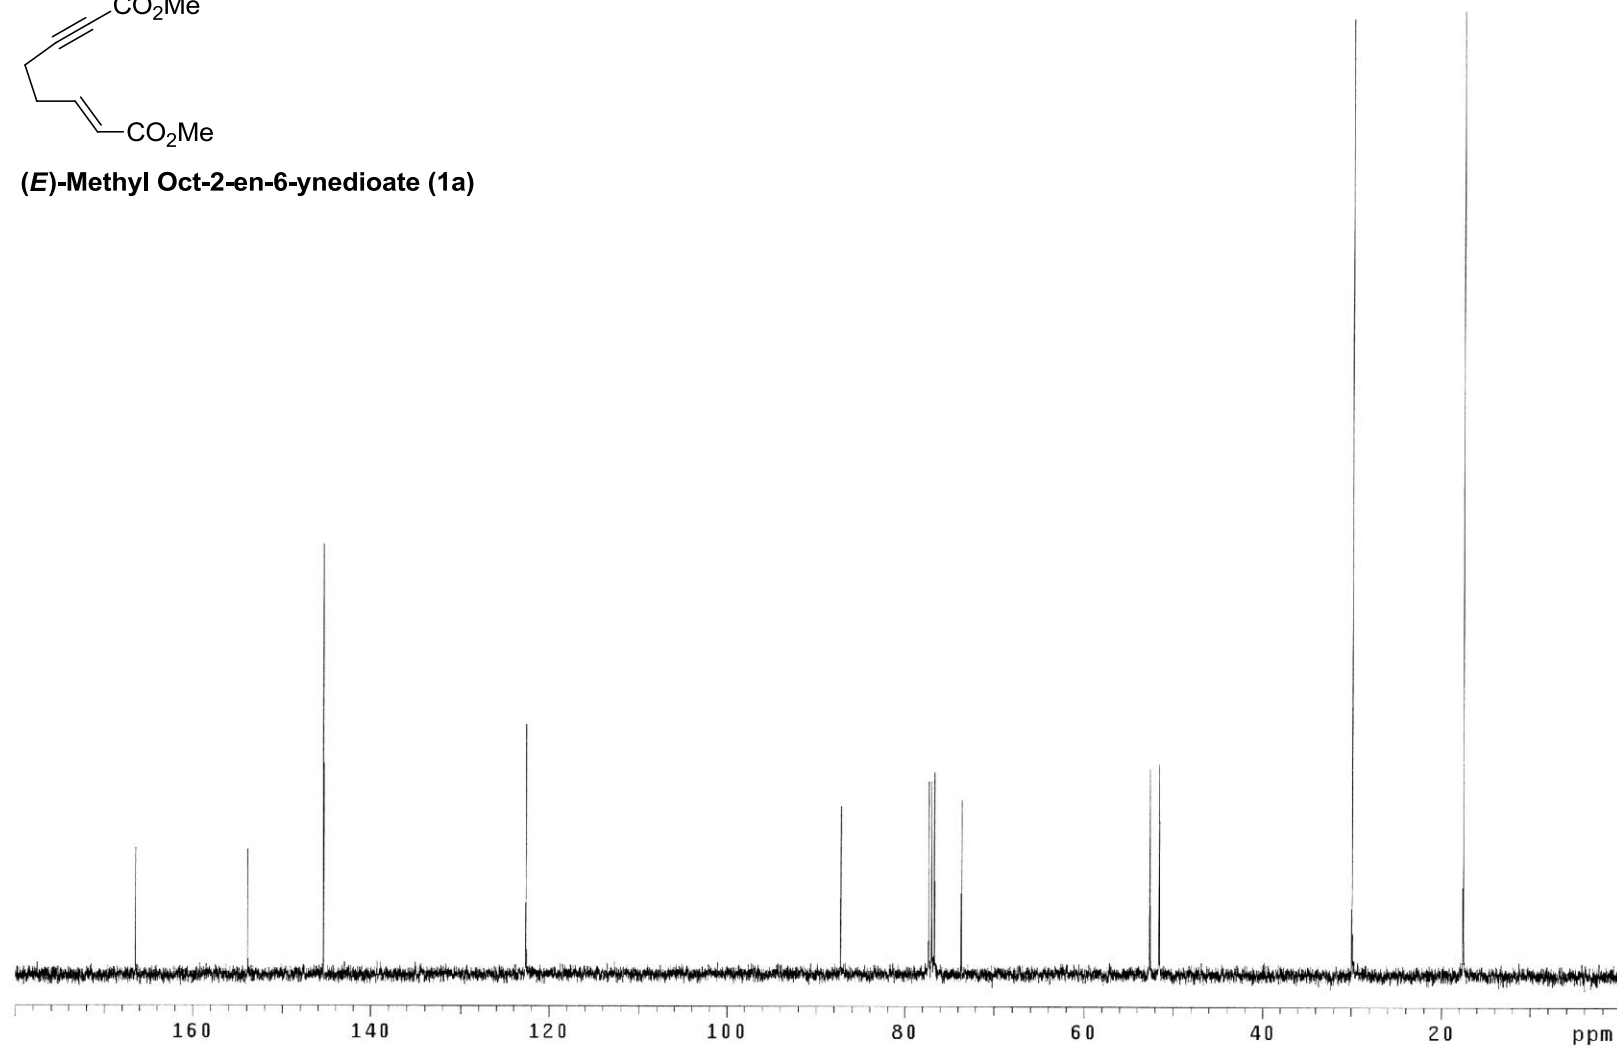

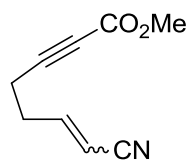

**Methyl 7-cyanohept-6-en-2-ynoate (1b)**

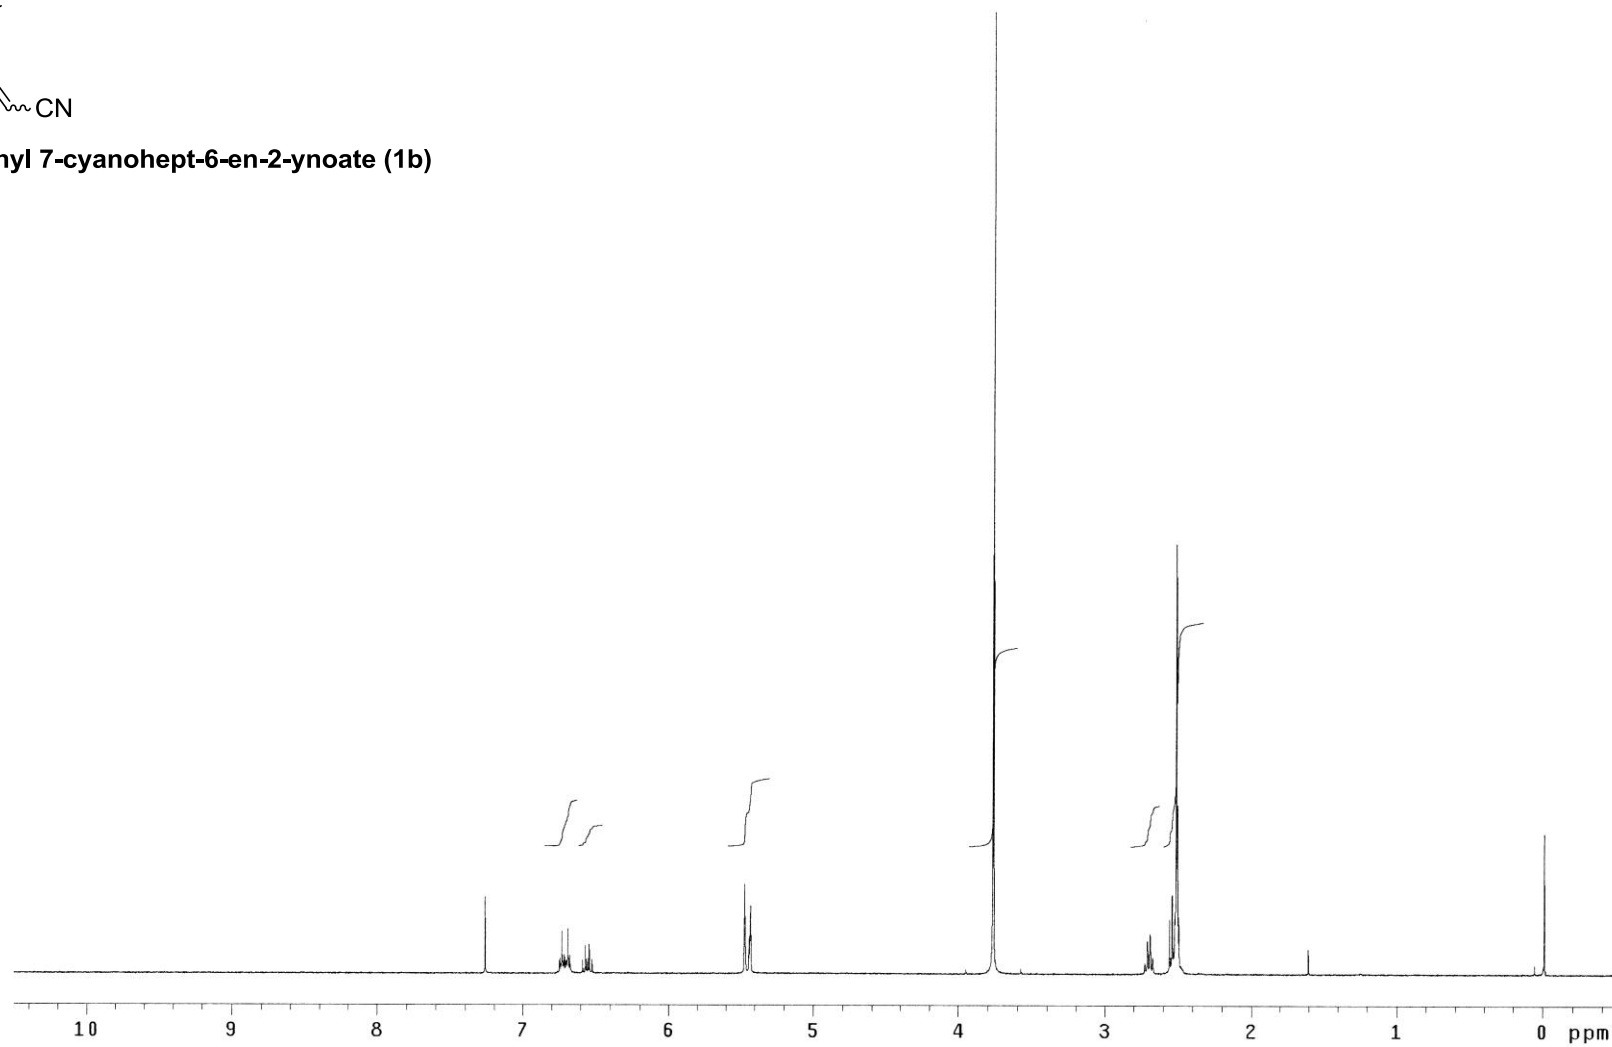

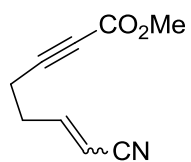

**Methyl 7-cyanohept-6-en-2-ynoate (1b)**

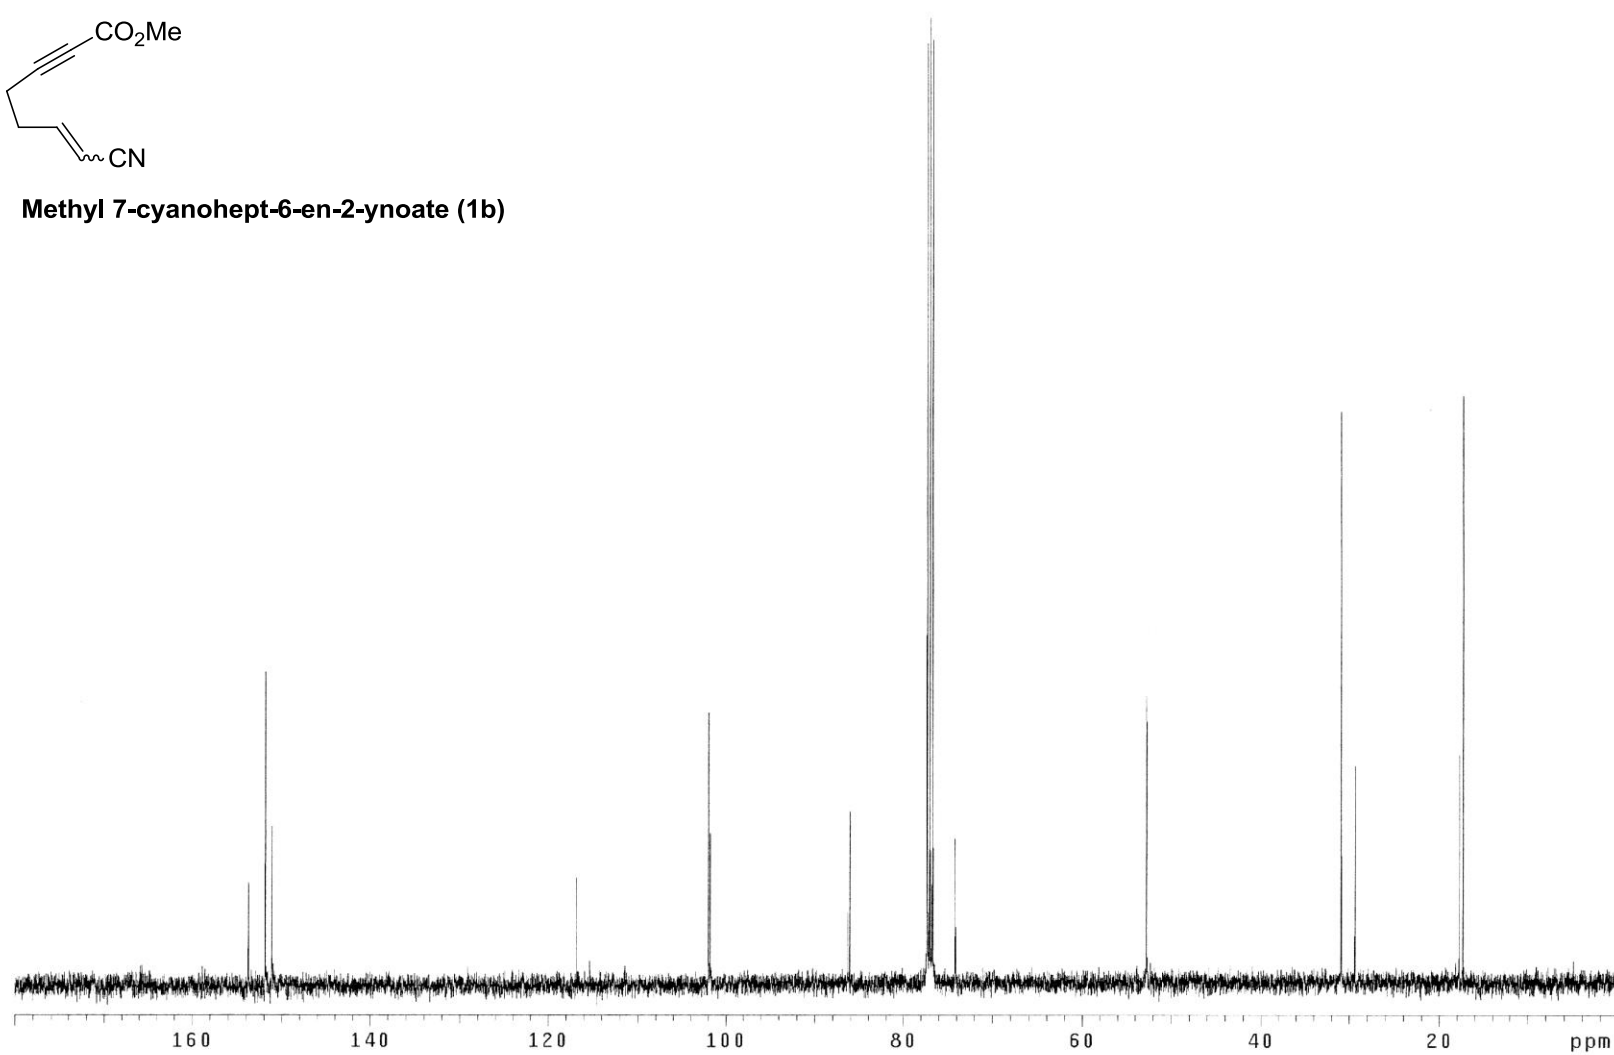



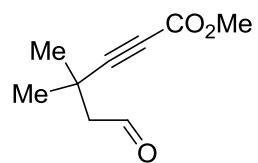

**Methyl 4,4-dimethyl-6-oxohex-2-ynoate**

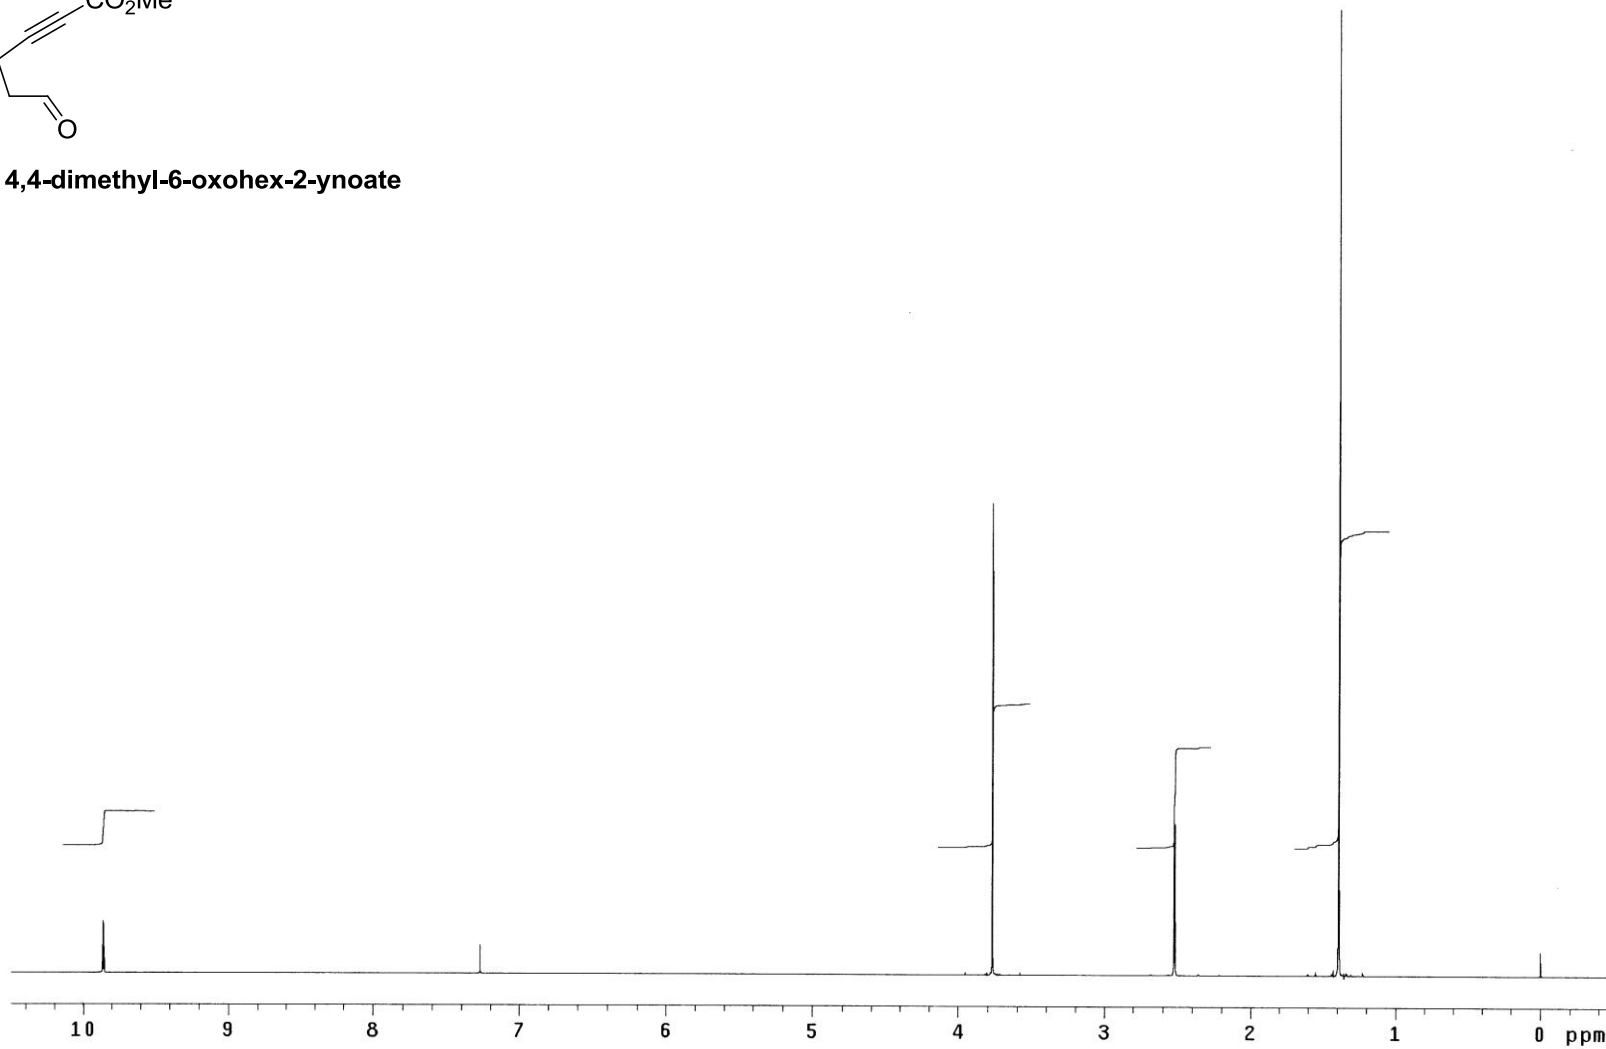

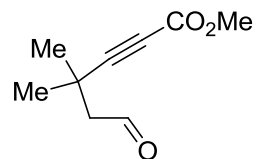

**Methyl 4,4-dimethyl-6-oxohex-2-ynoate**

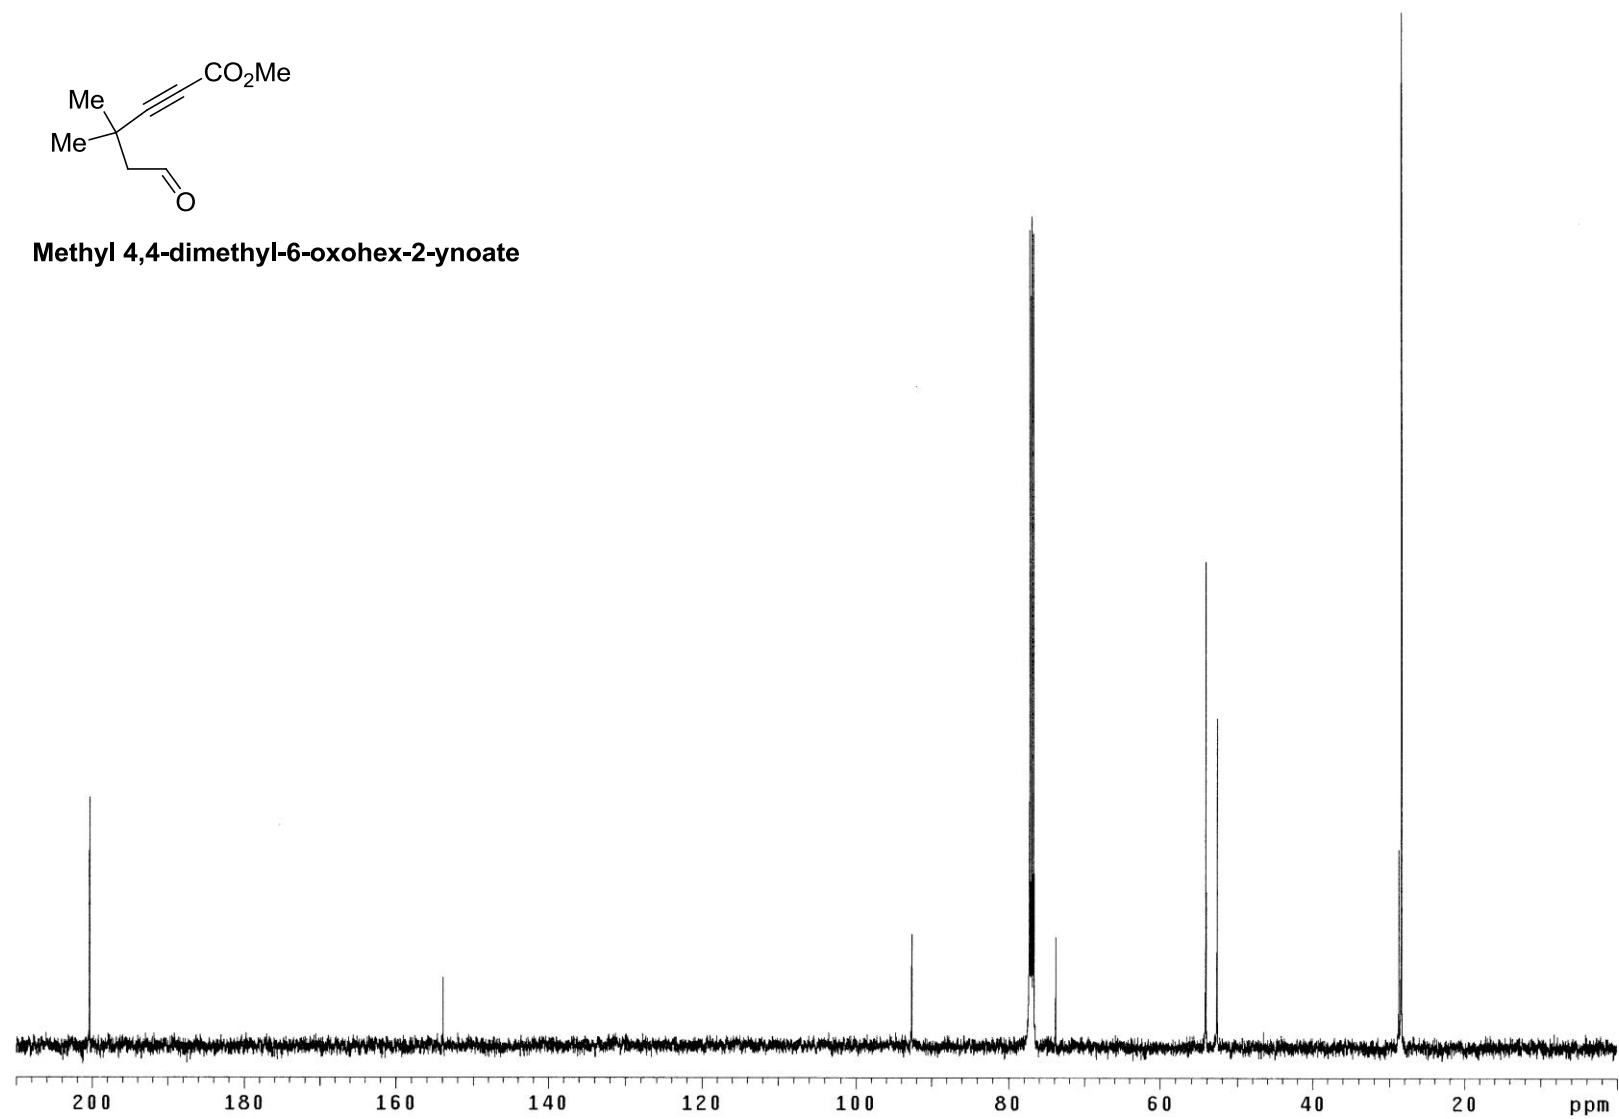

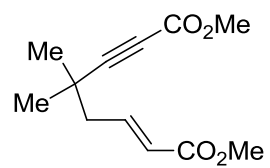

**(*E*)-dimethyl 5,5-dimethyloct-2-en-6-ynedioate (1c)**

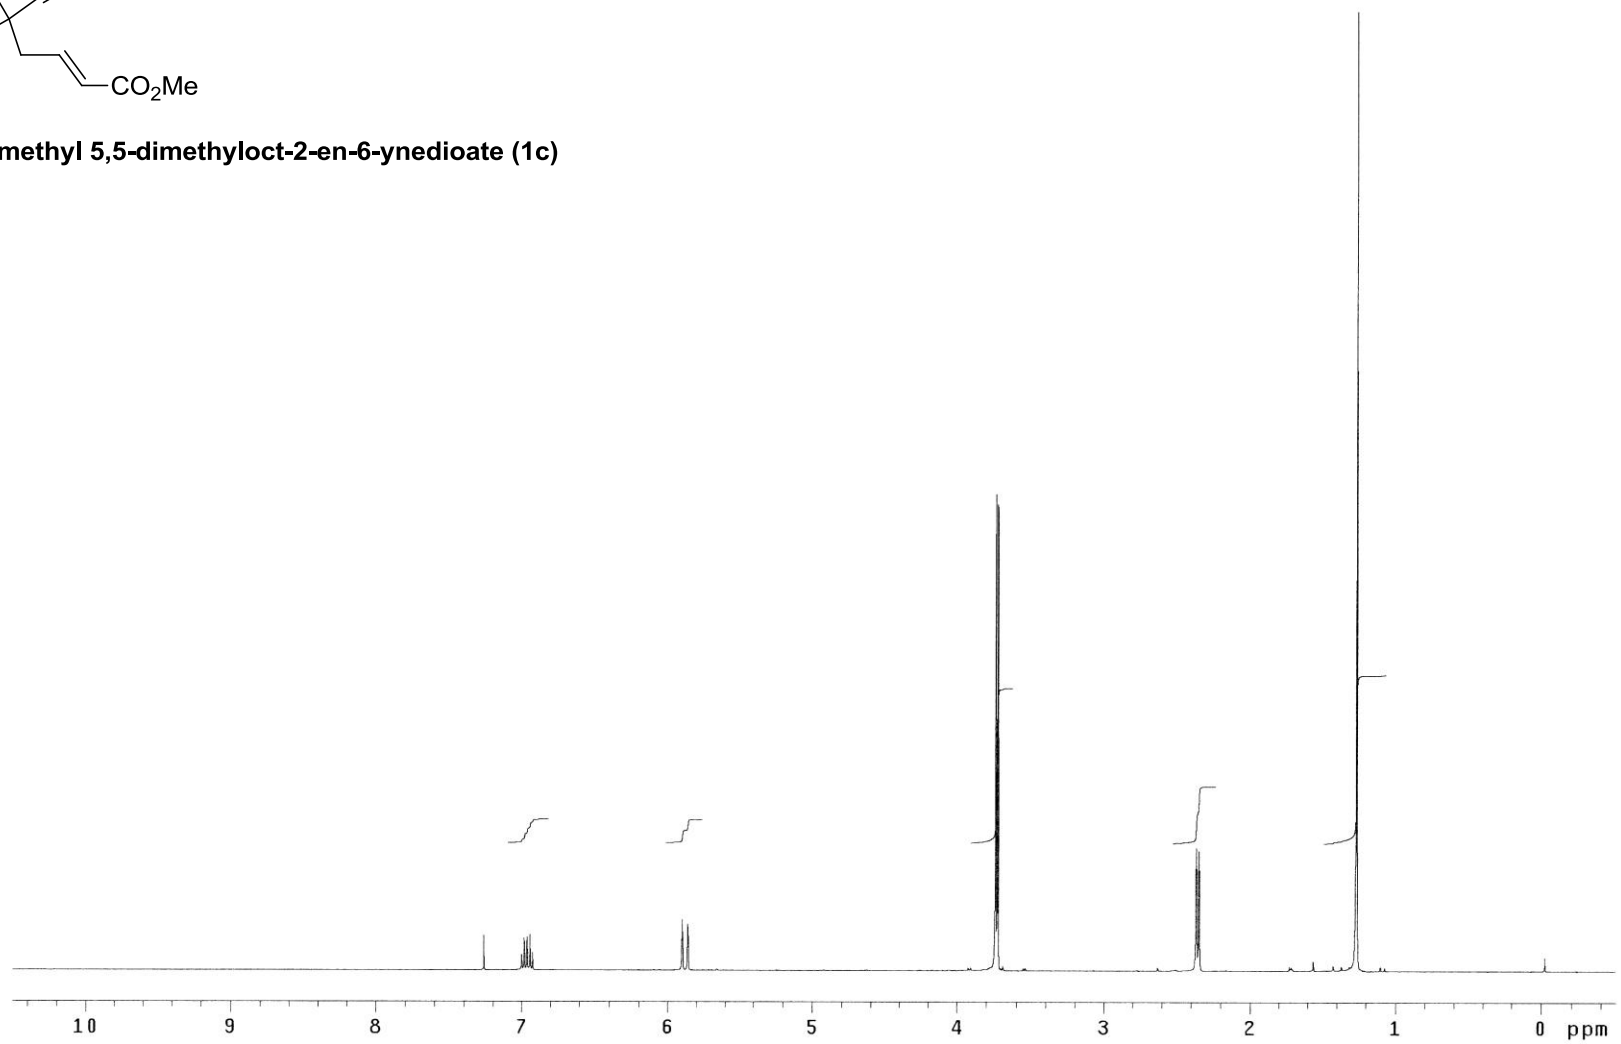

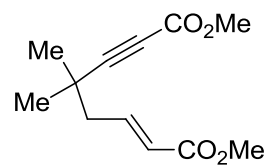

**(*E*)-dimethyl 5,5-dimethyloct-2-en-6-ynoate (1c)**

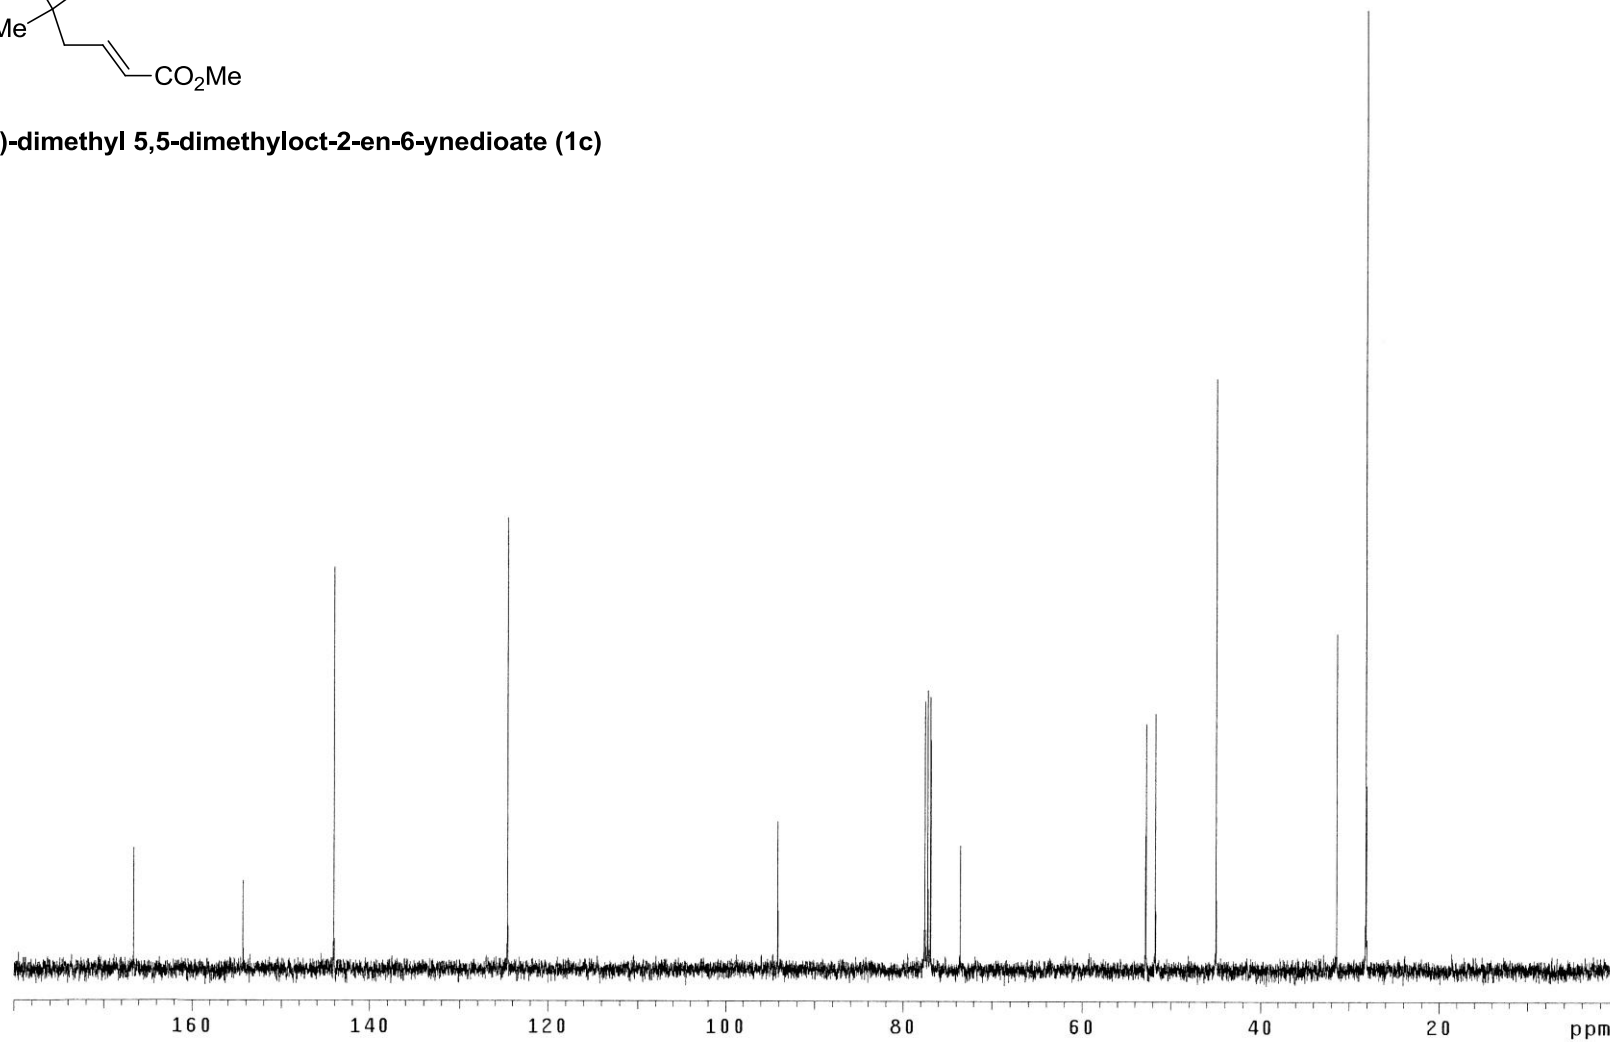

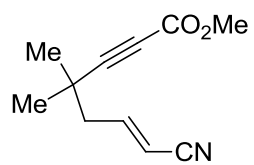

**(E)-Methyl 7-Cyano-4,4-dimethyl-hept-6-en-2-ynoate (1d)**

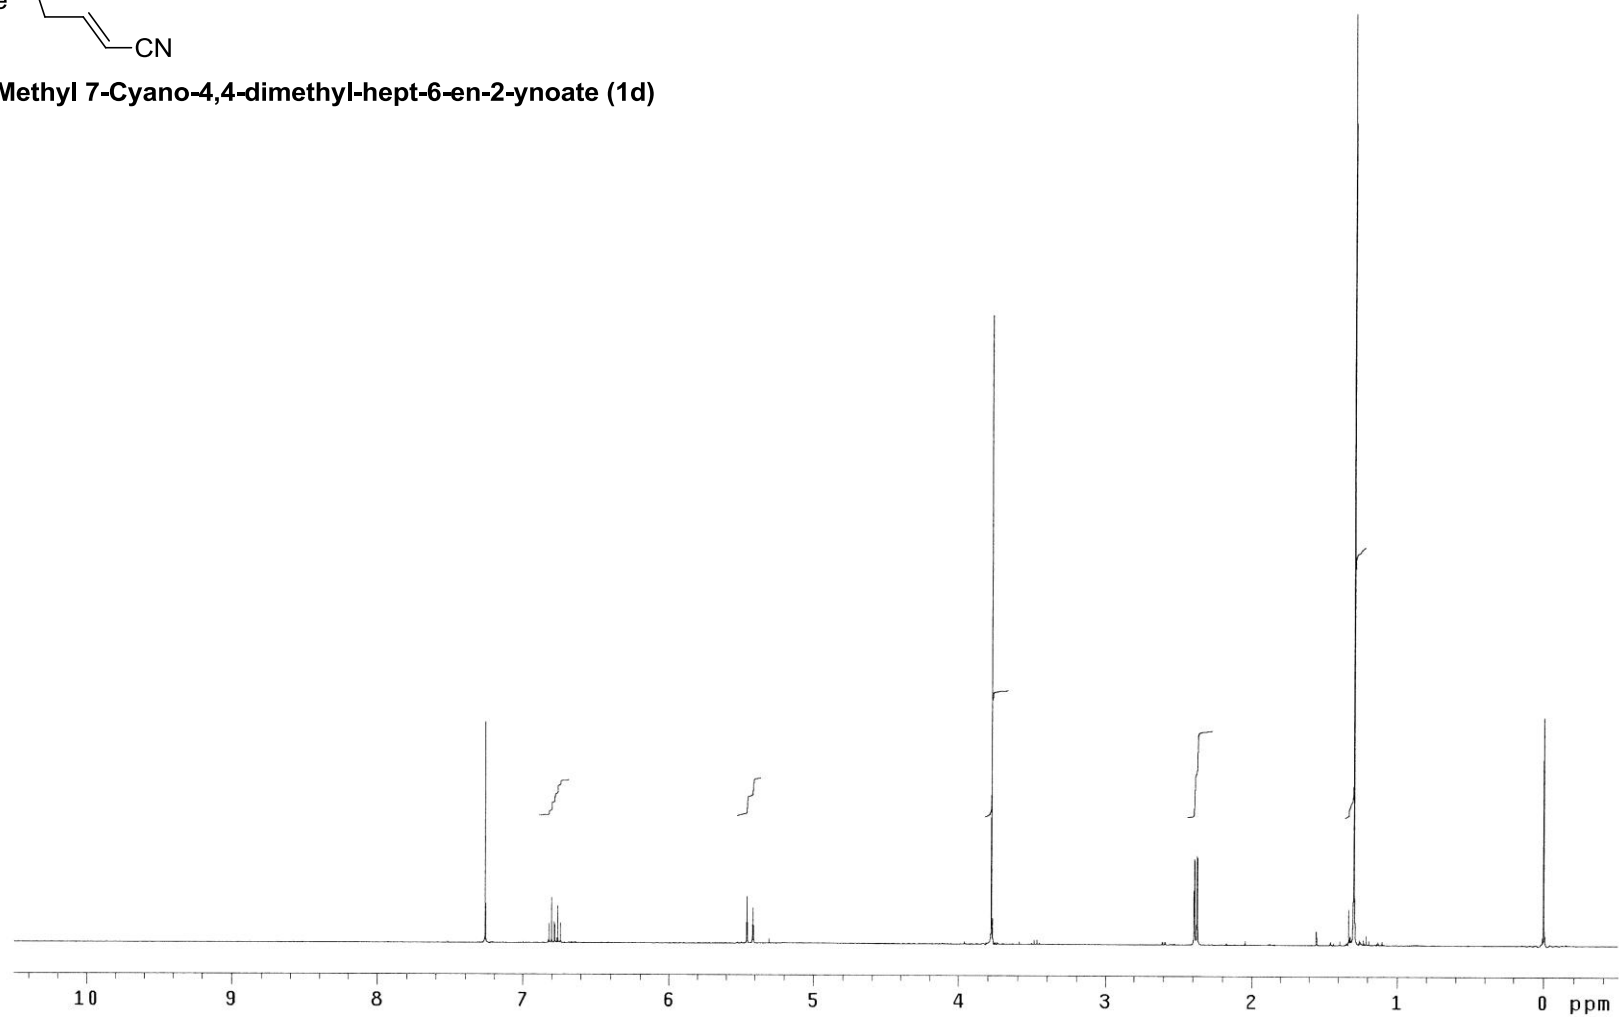

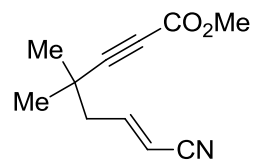

**(E)-Methyl 7-Cyano-4,4-dimethyl-hept-6-en-2-ynoate (1d)**

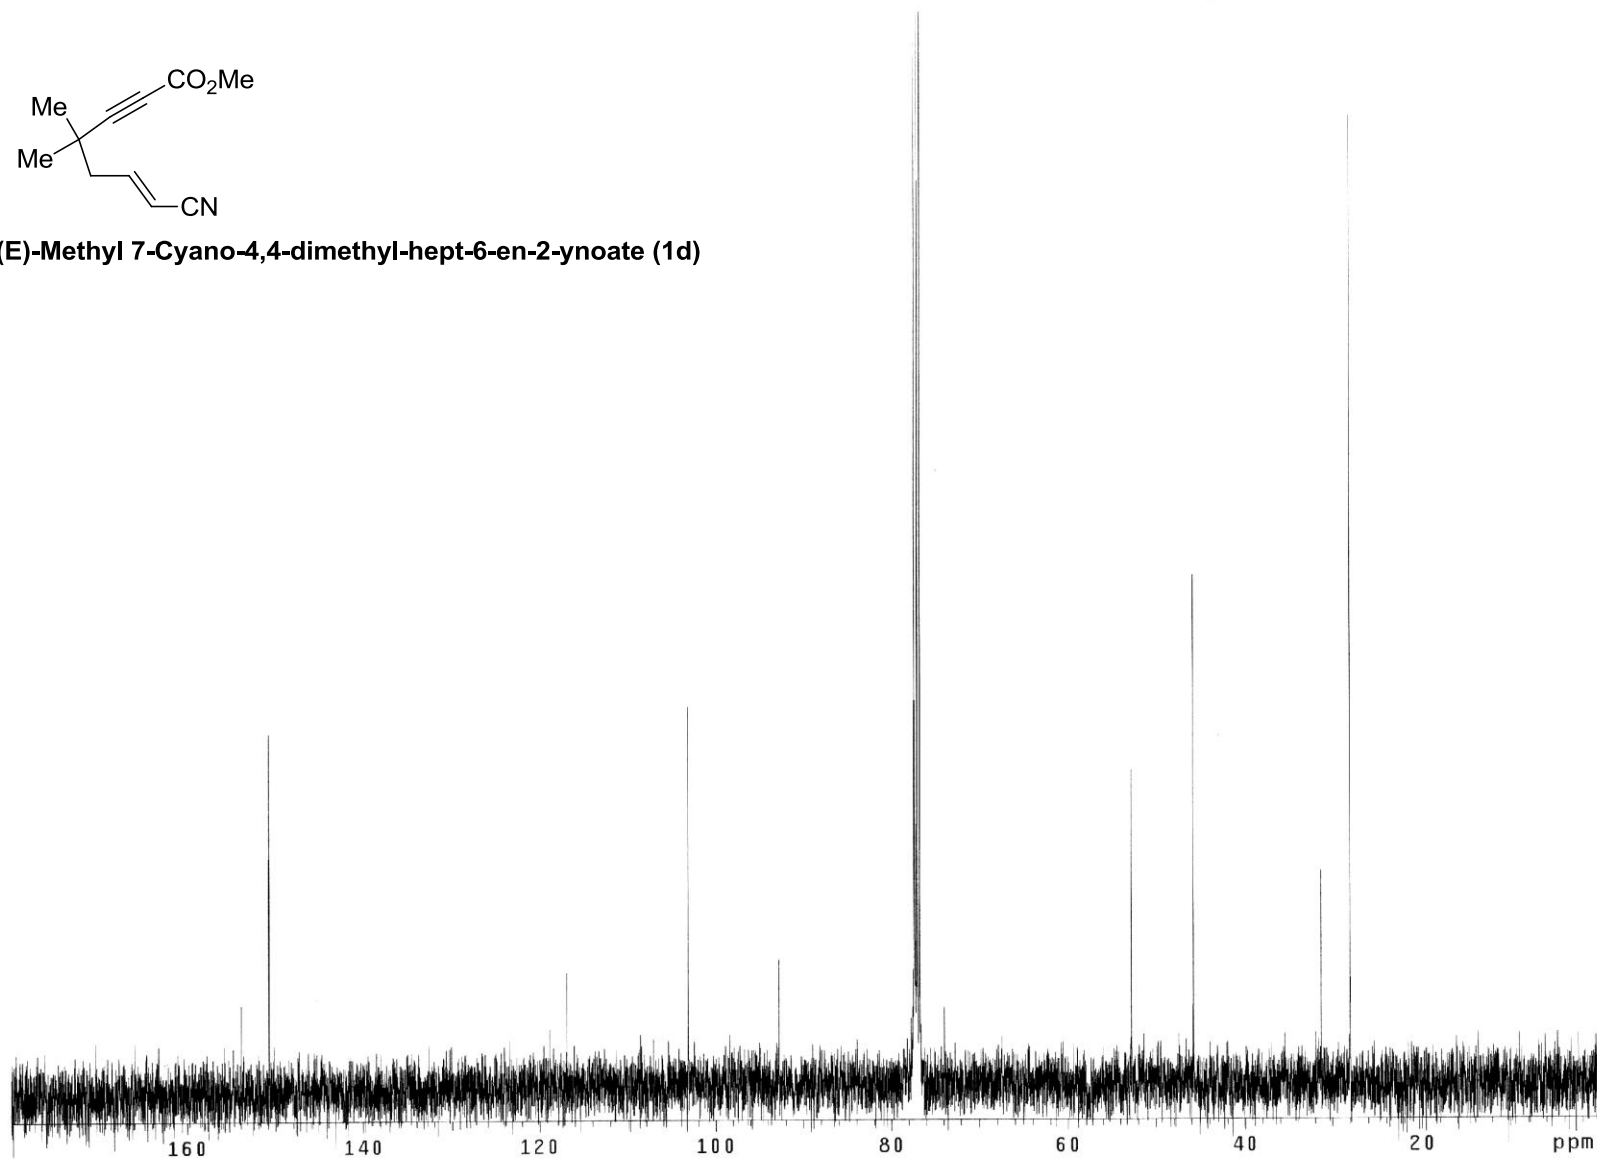

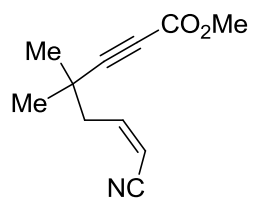

**(Z)-Methyl 7-Cyano-4,4-dimethyl-hept-6-en-2-ynoate (1e)**

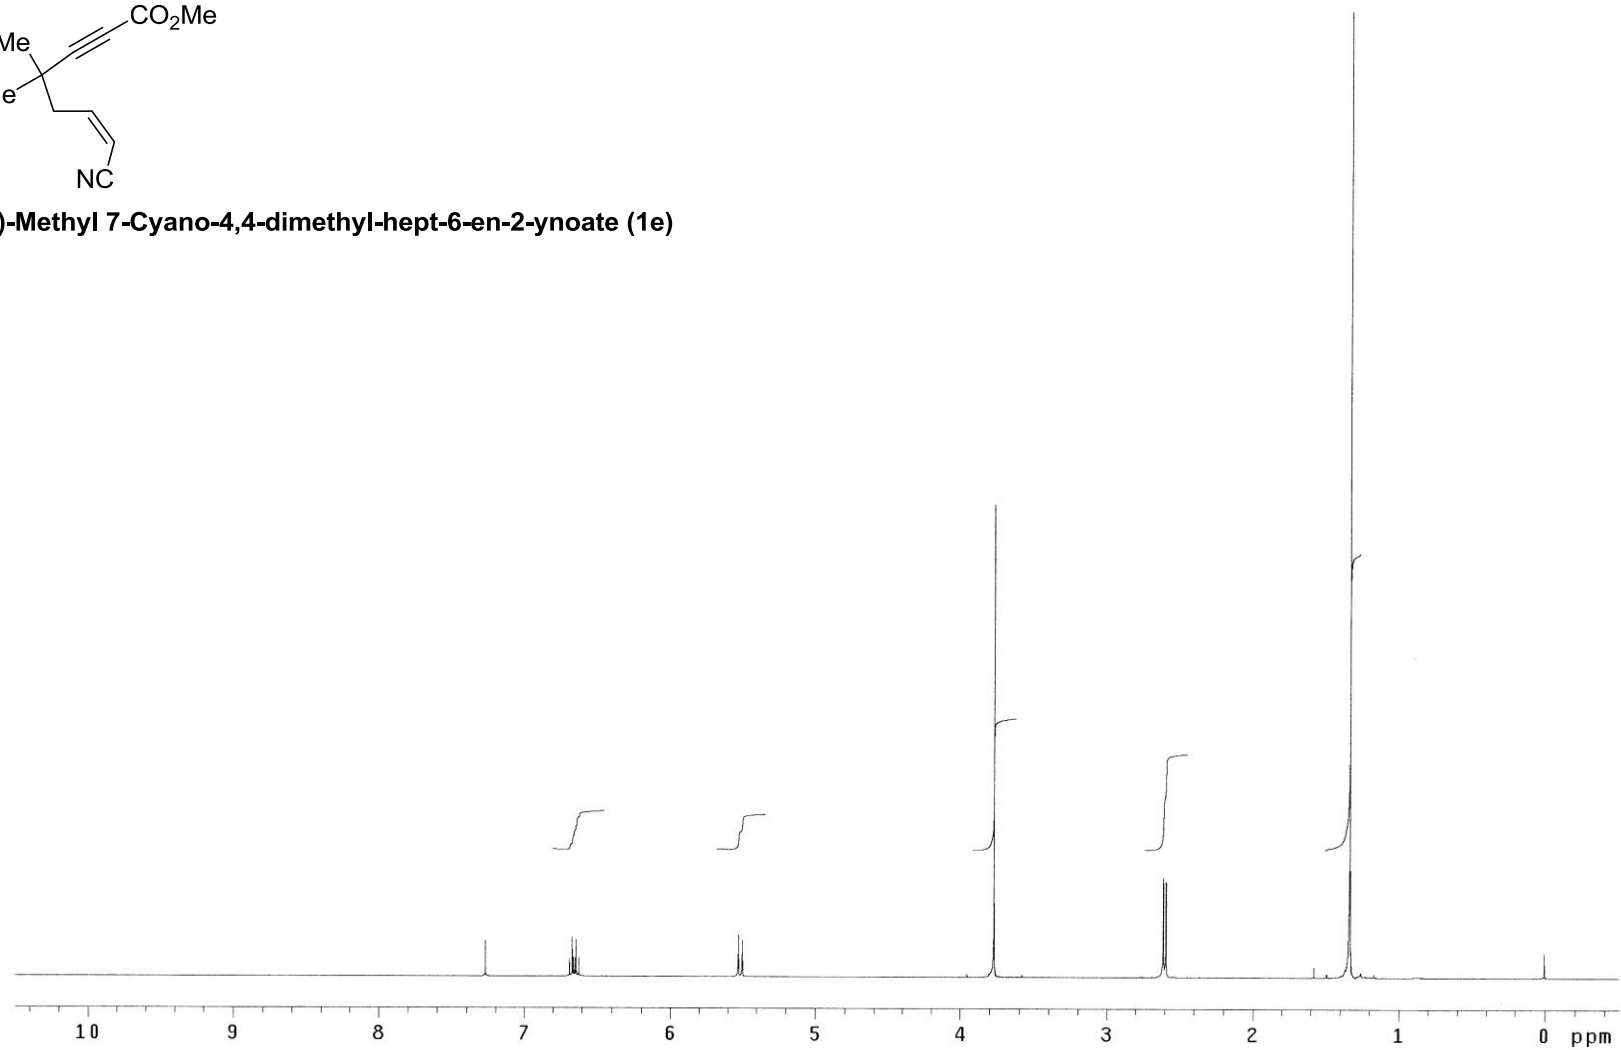

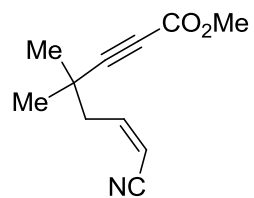

**(Z)-Methyl 7-Cyano-4,4-dimethyl-hept-6-en-2-ynoate (1e)**

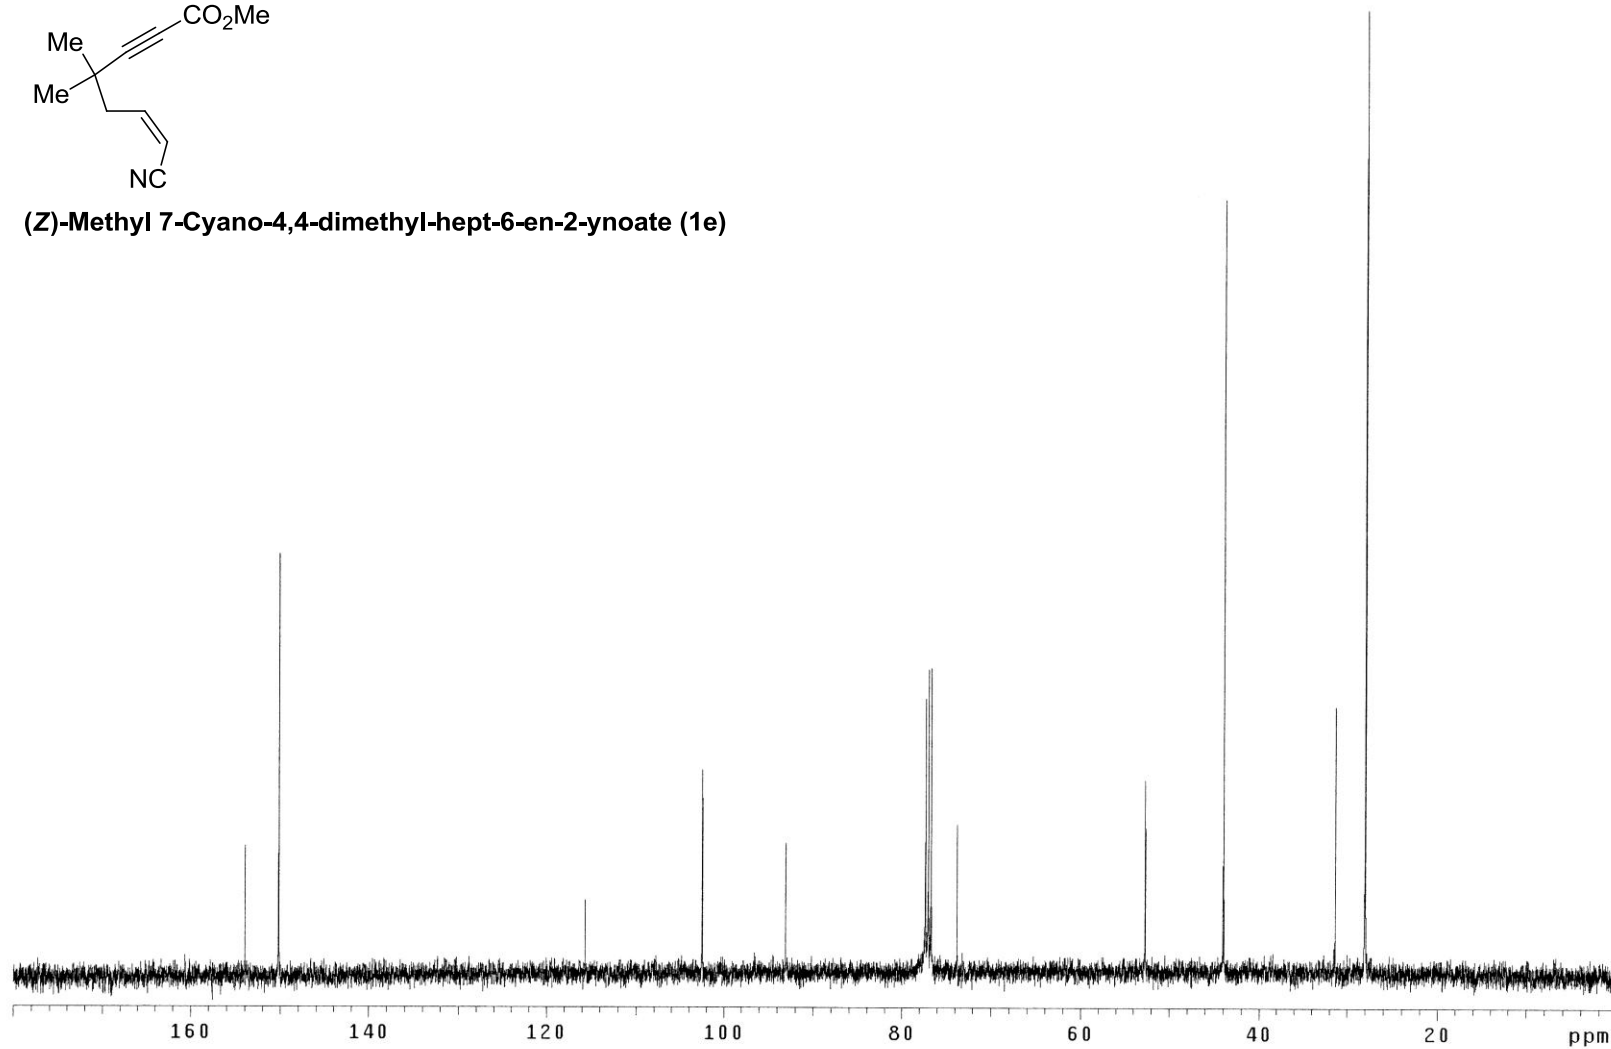



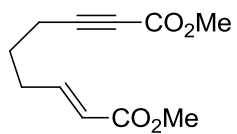

**(E)-Dimethyl non-2-en-7-ynedioate (1f)**

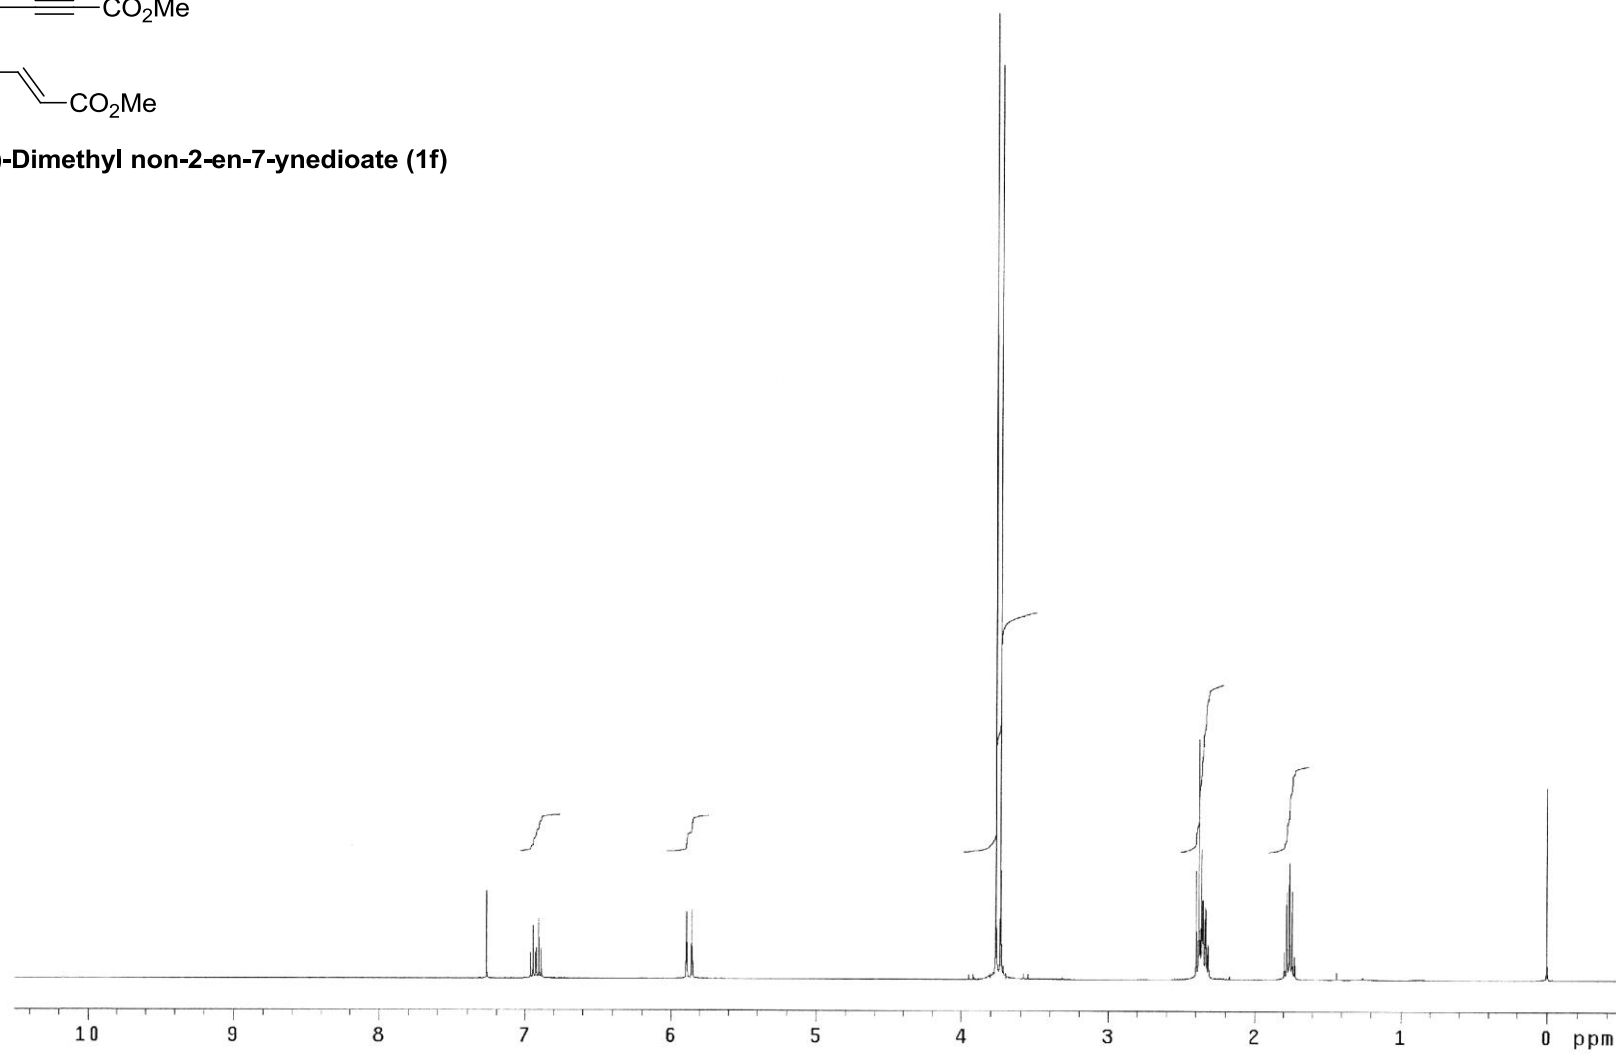

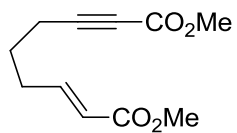

**(E)-Dimethyl non-2-en-7-ynedioate (1f)**

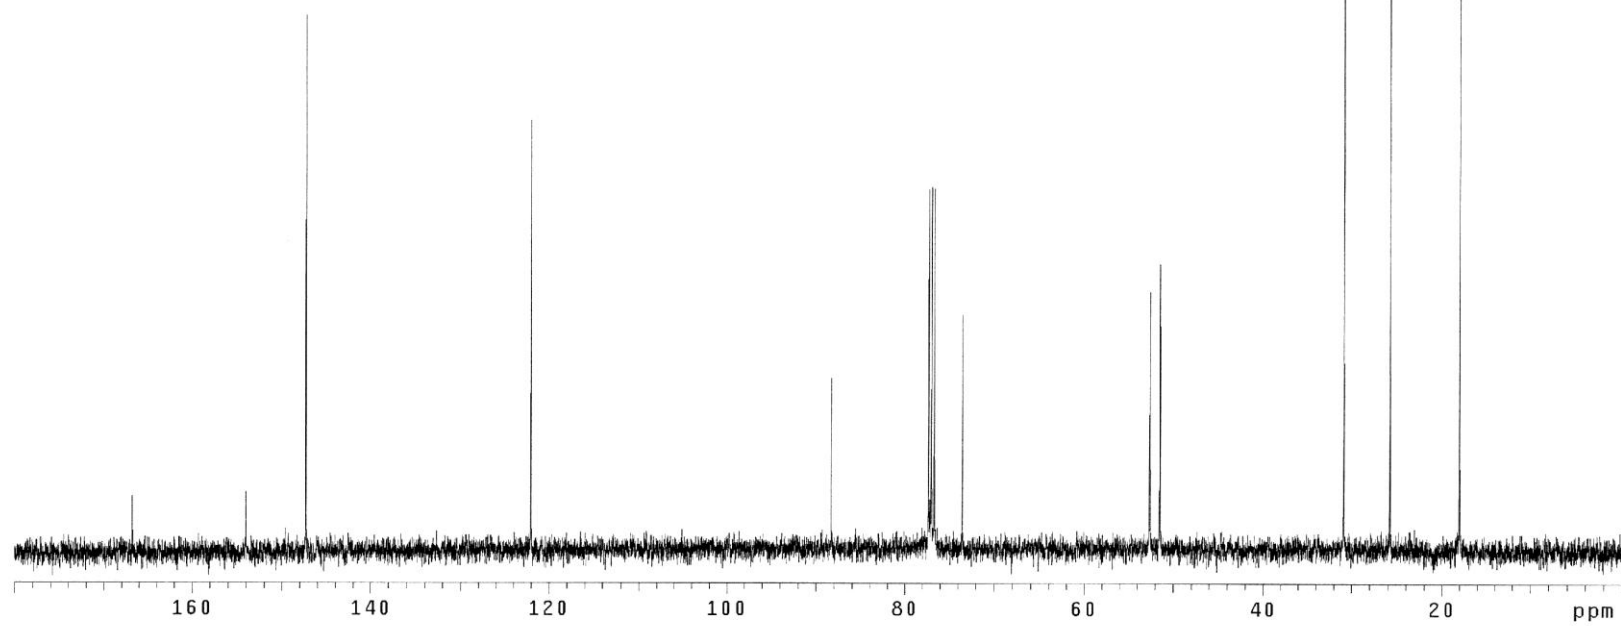

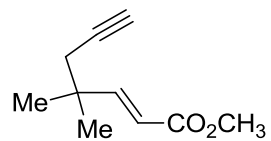

**(E)-Methyl 4,4-dimethylhept-2-en-6-ynoate (6a)**

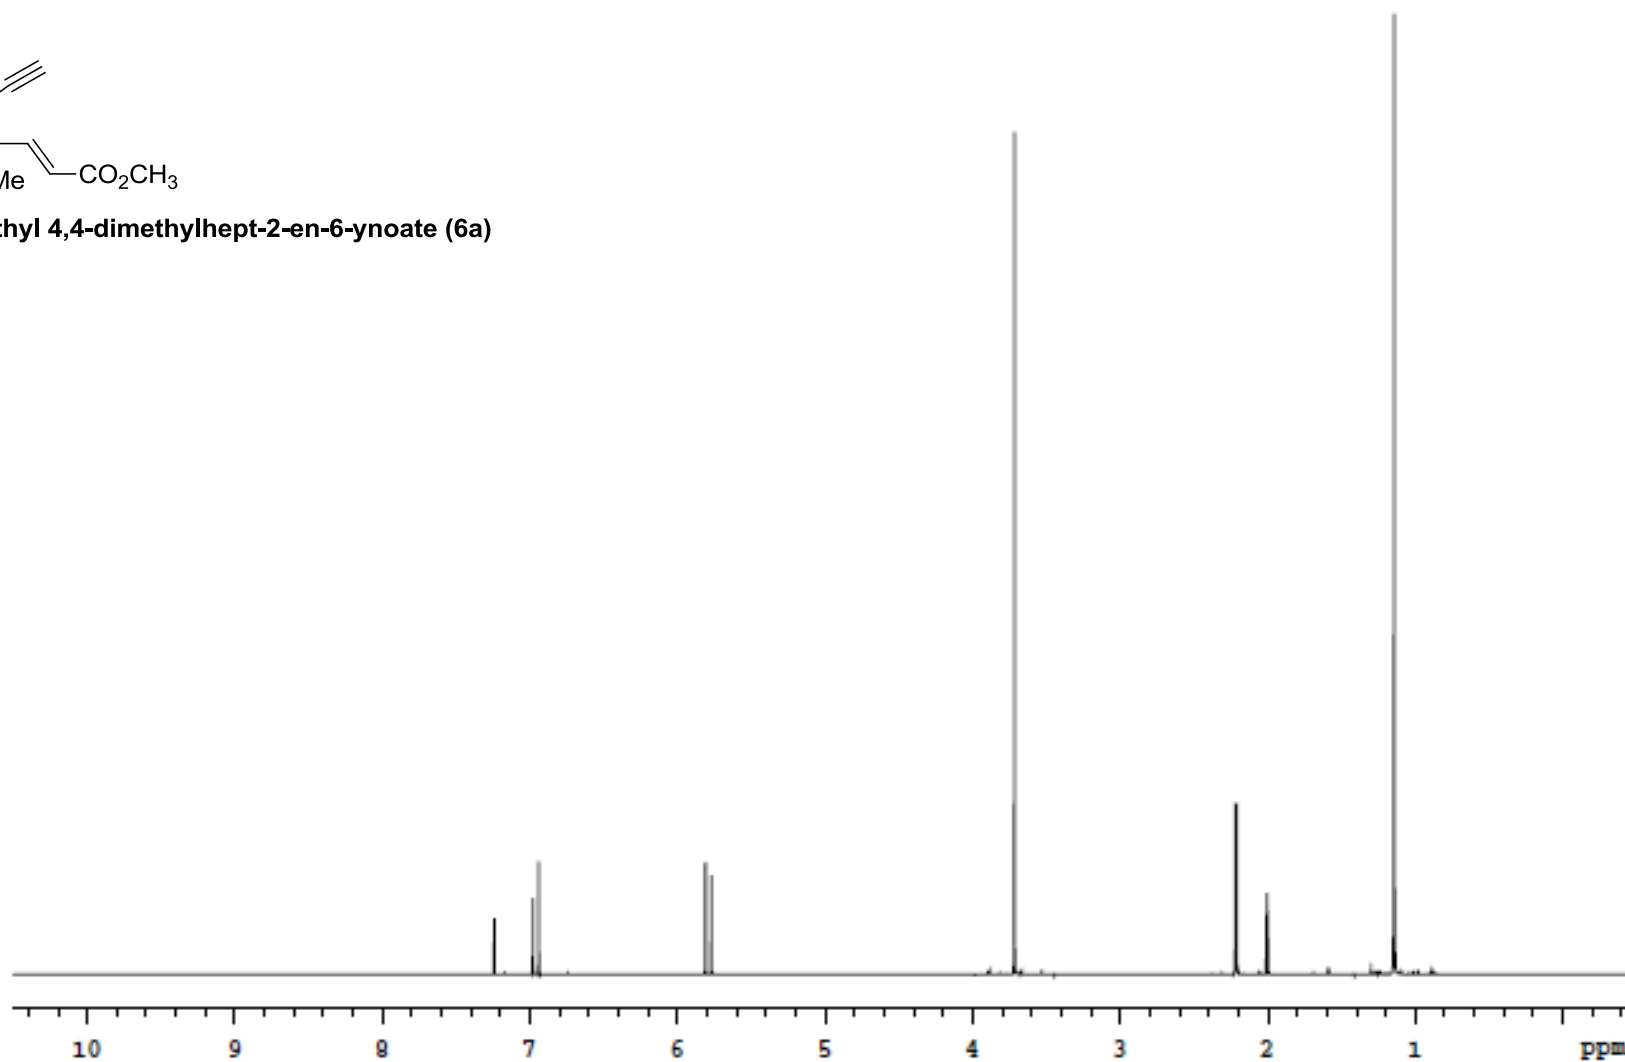

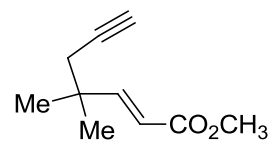

**(E)-Methyl 4,4-dimethylhept-2-en-6-ynoate (6a)**

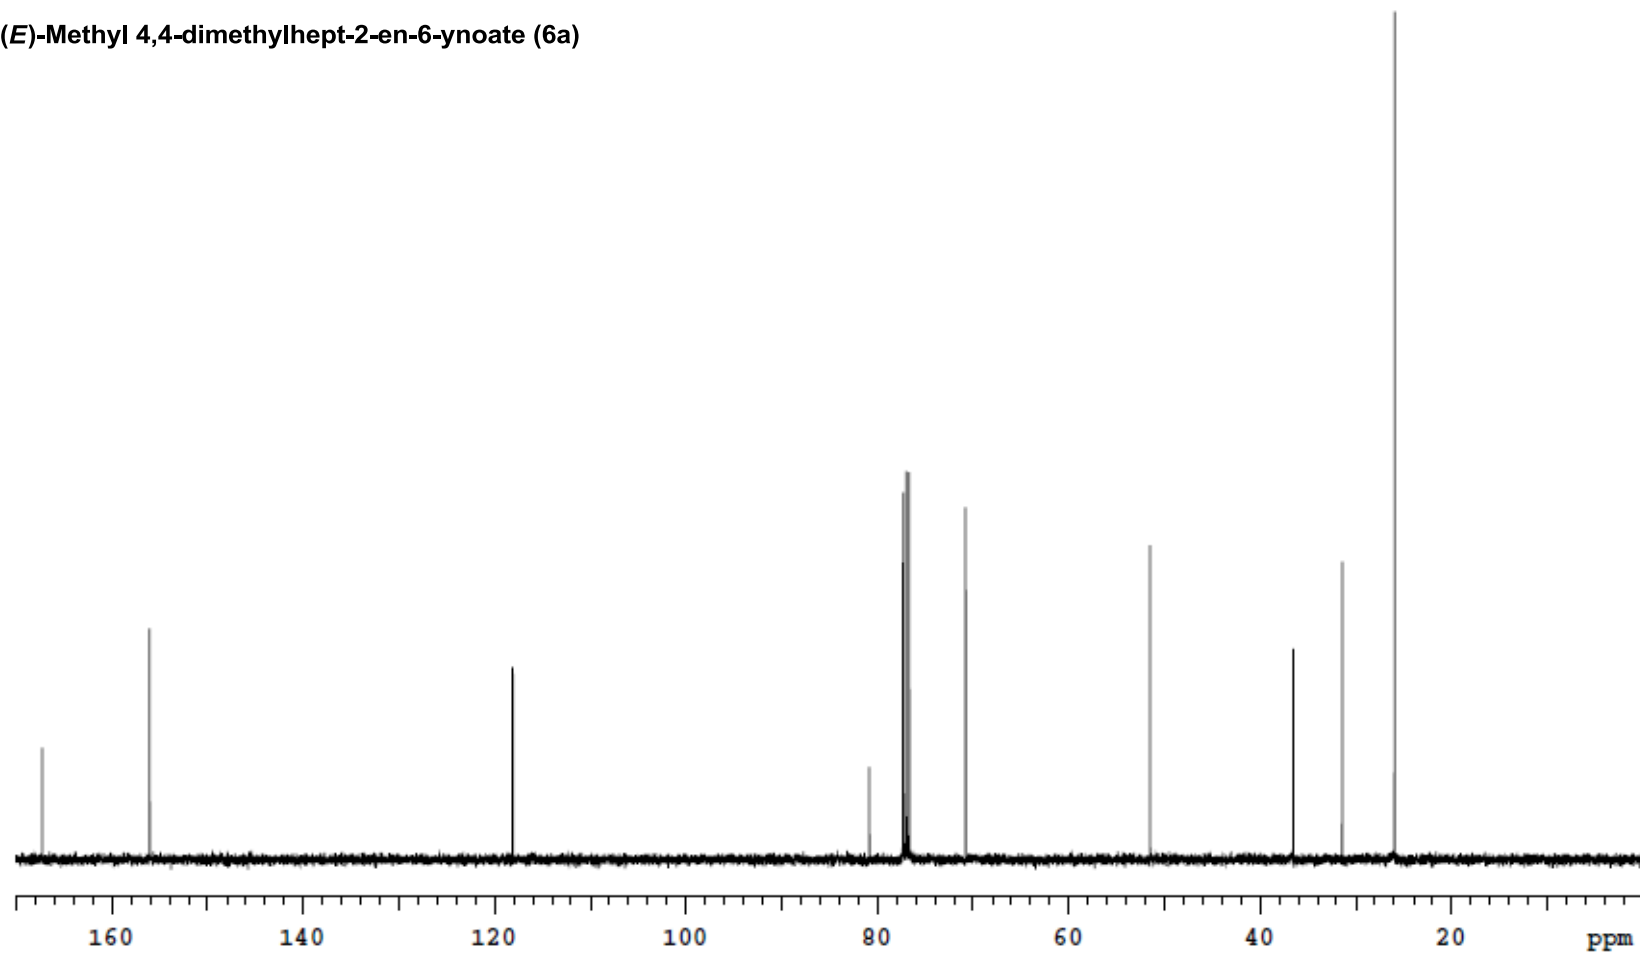

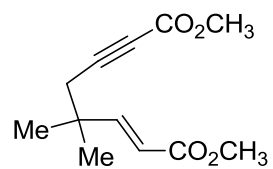

**(E)-Dimethyl 4,4-dimethyloct-2-en-6-ynedioate (1g)**

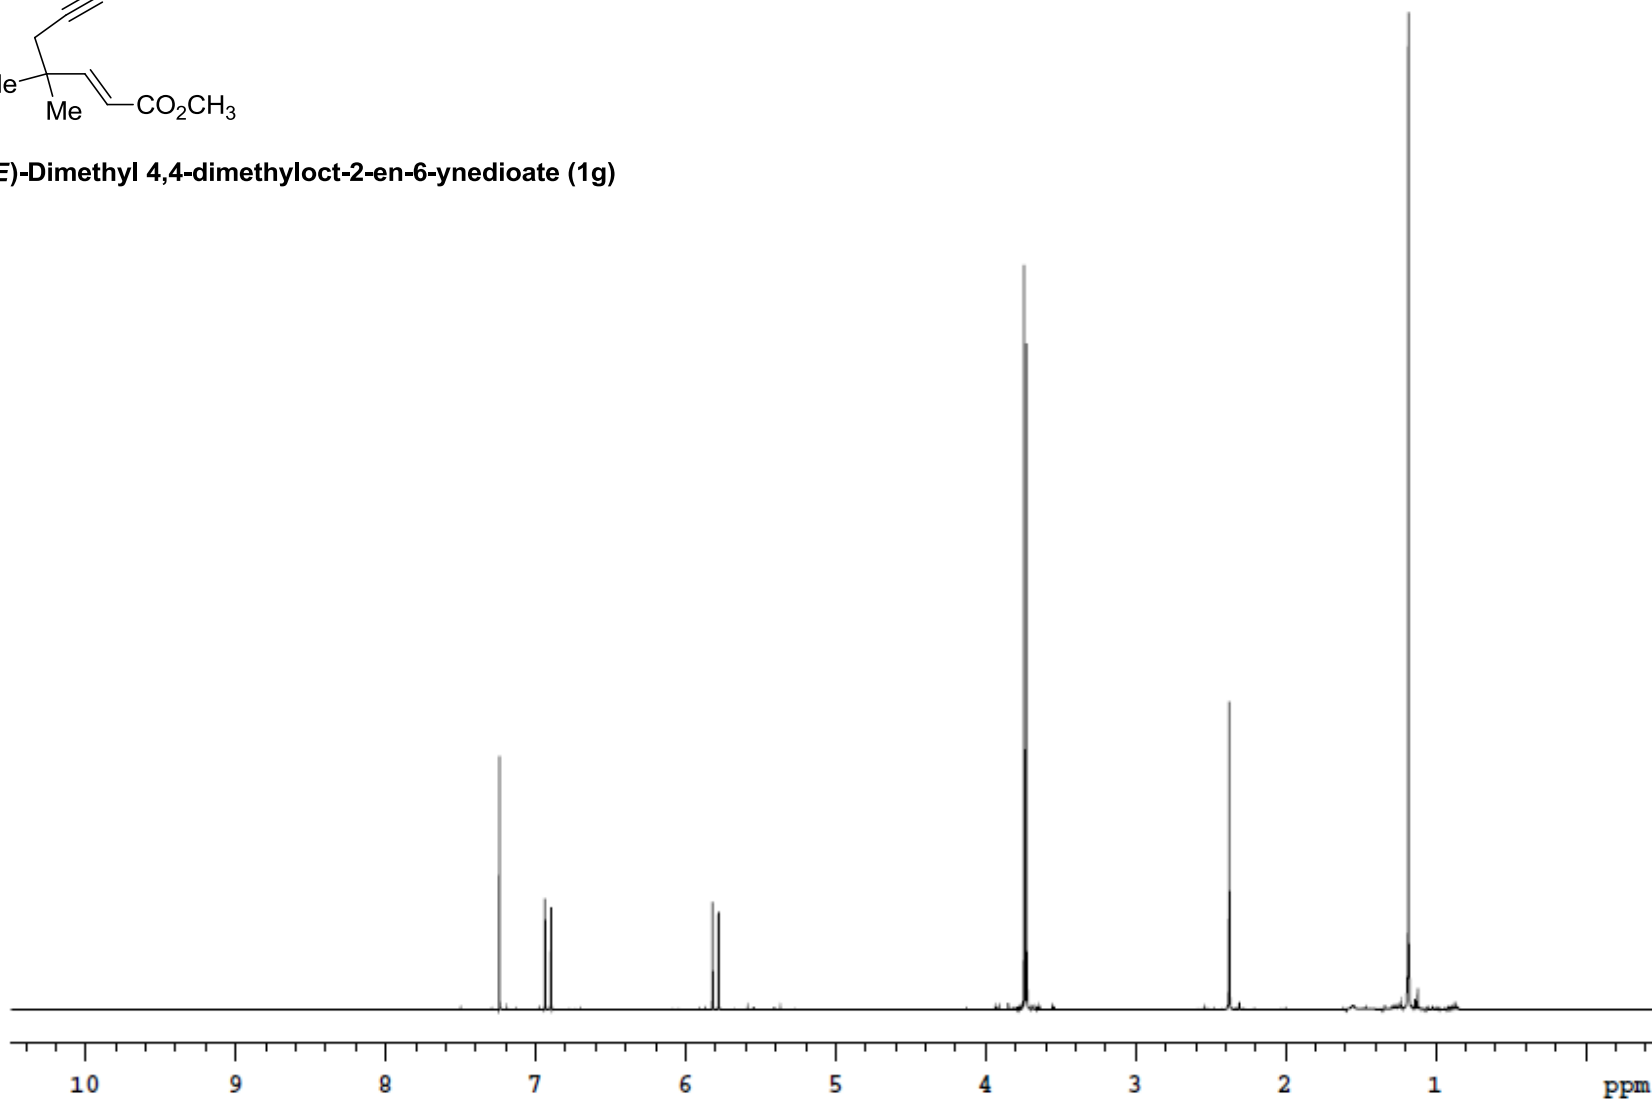

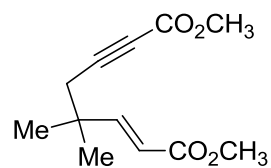

**(E)-Dimethyl 4,4-dimethyloct-2-en-6-ynedioate (1g)**

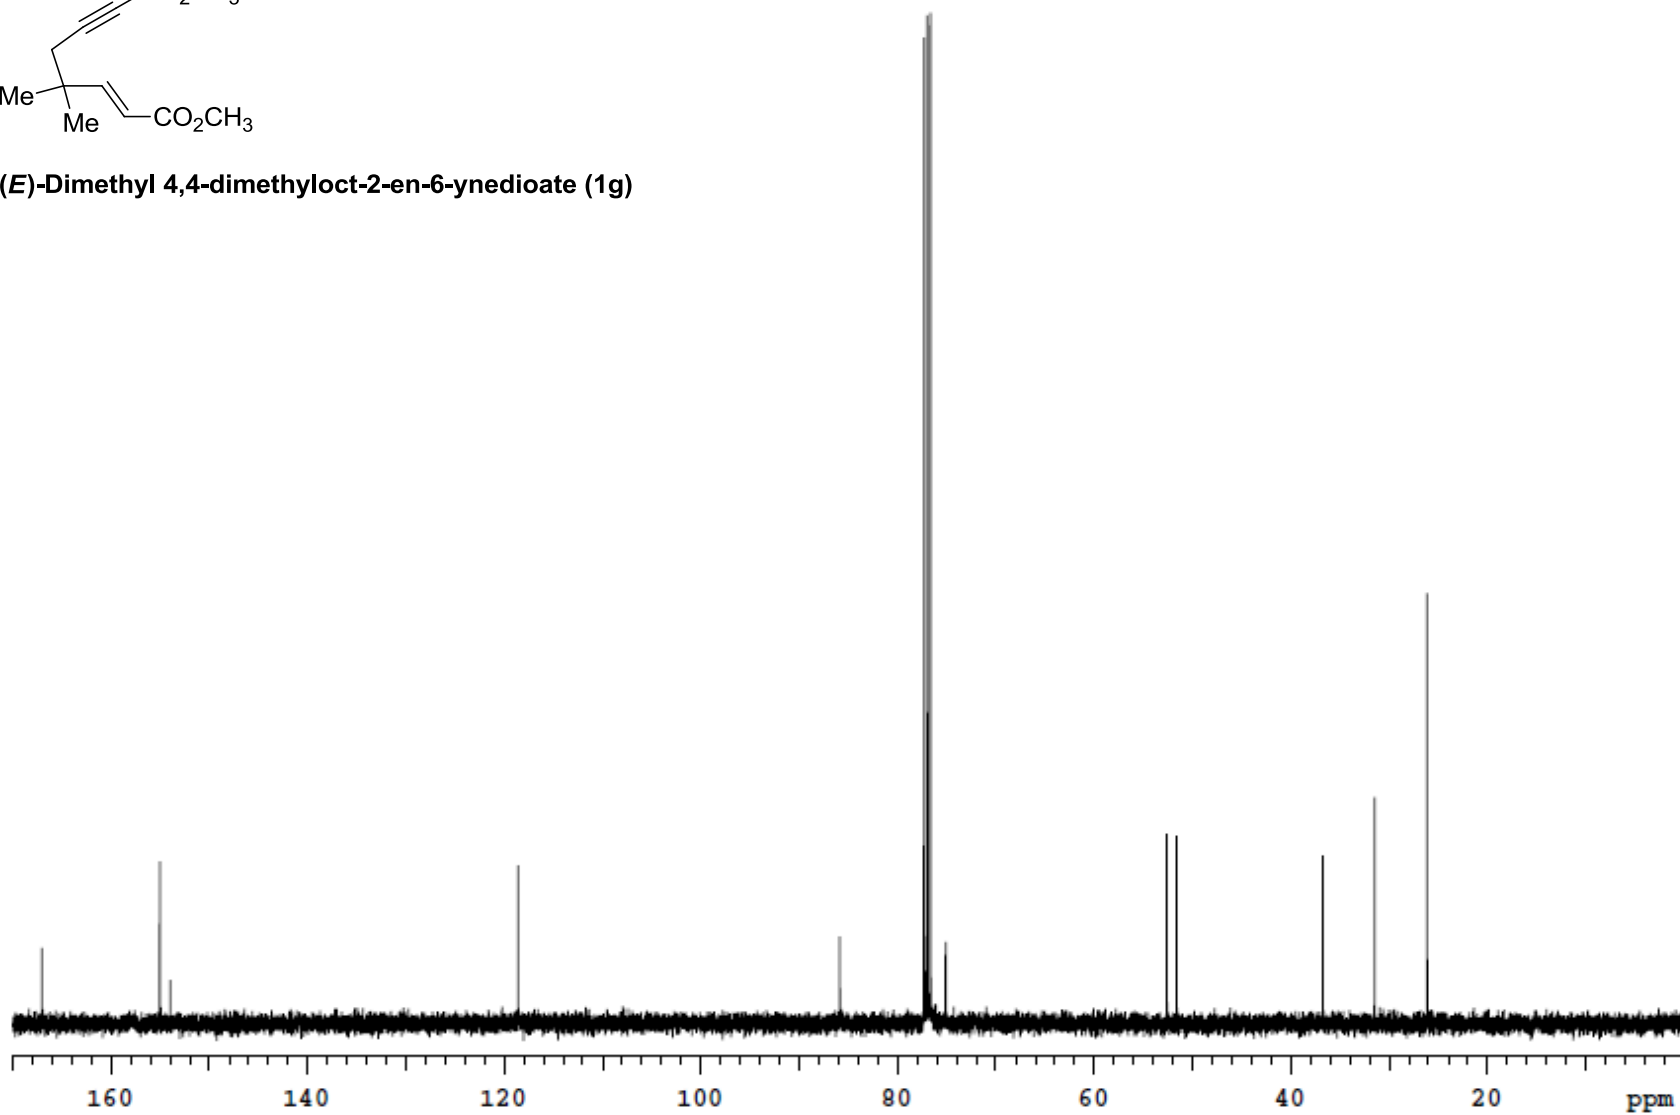

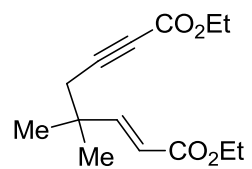

**(E)-Diethyl 4,4-dimethyloct-2-en-6-ynedioate (1h)**

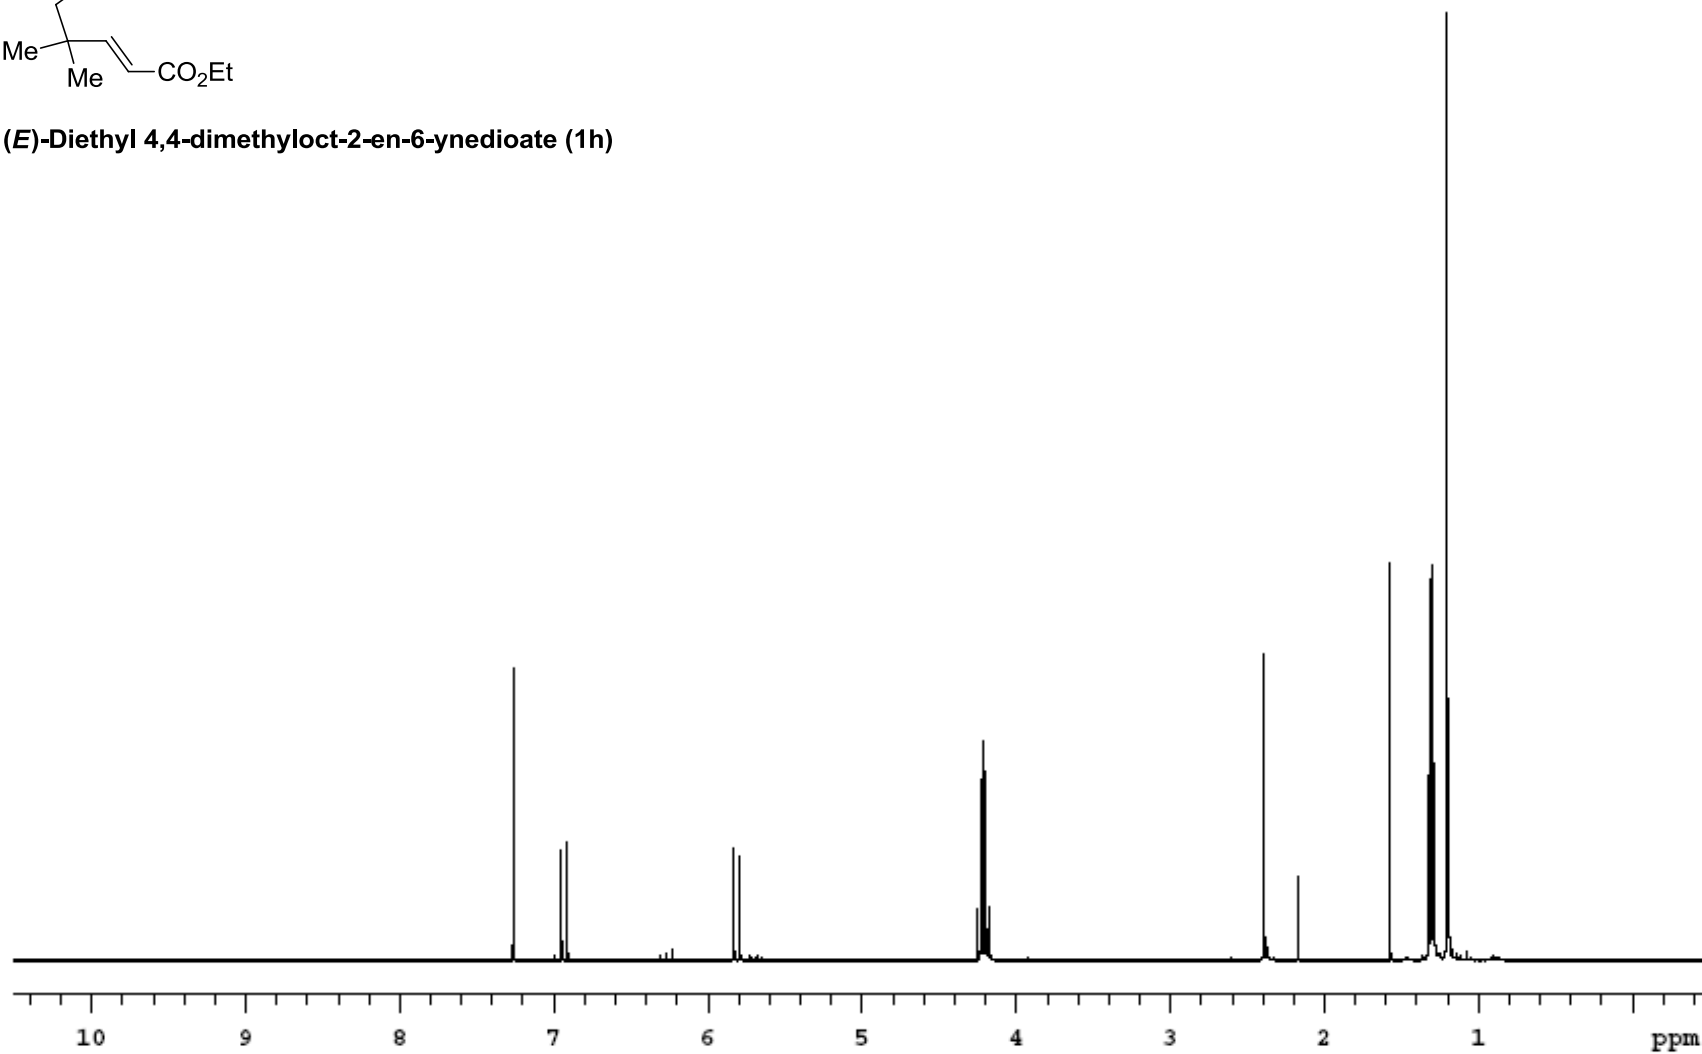



**(E)-Diethyl 4,4-dimethyloct-2-en-6-ynedioate (1h)**

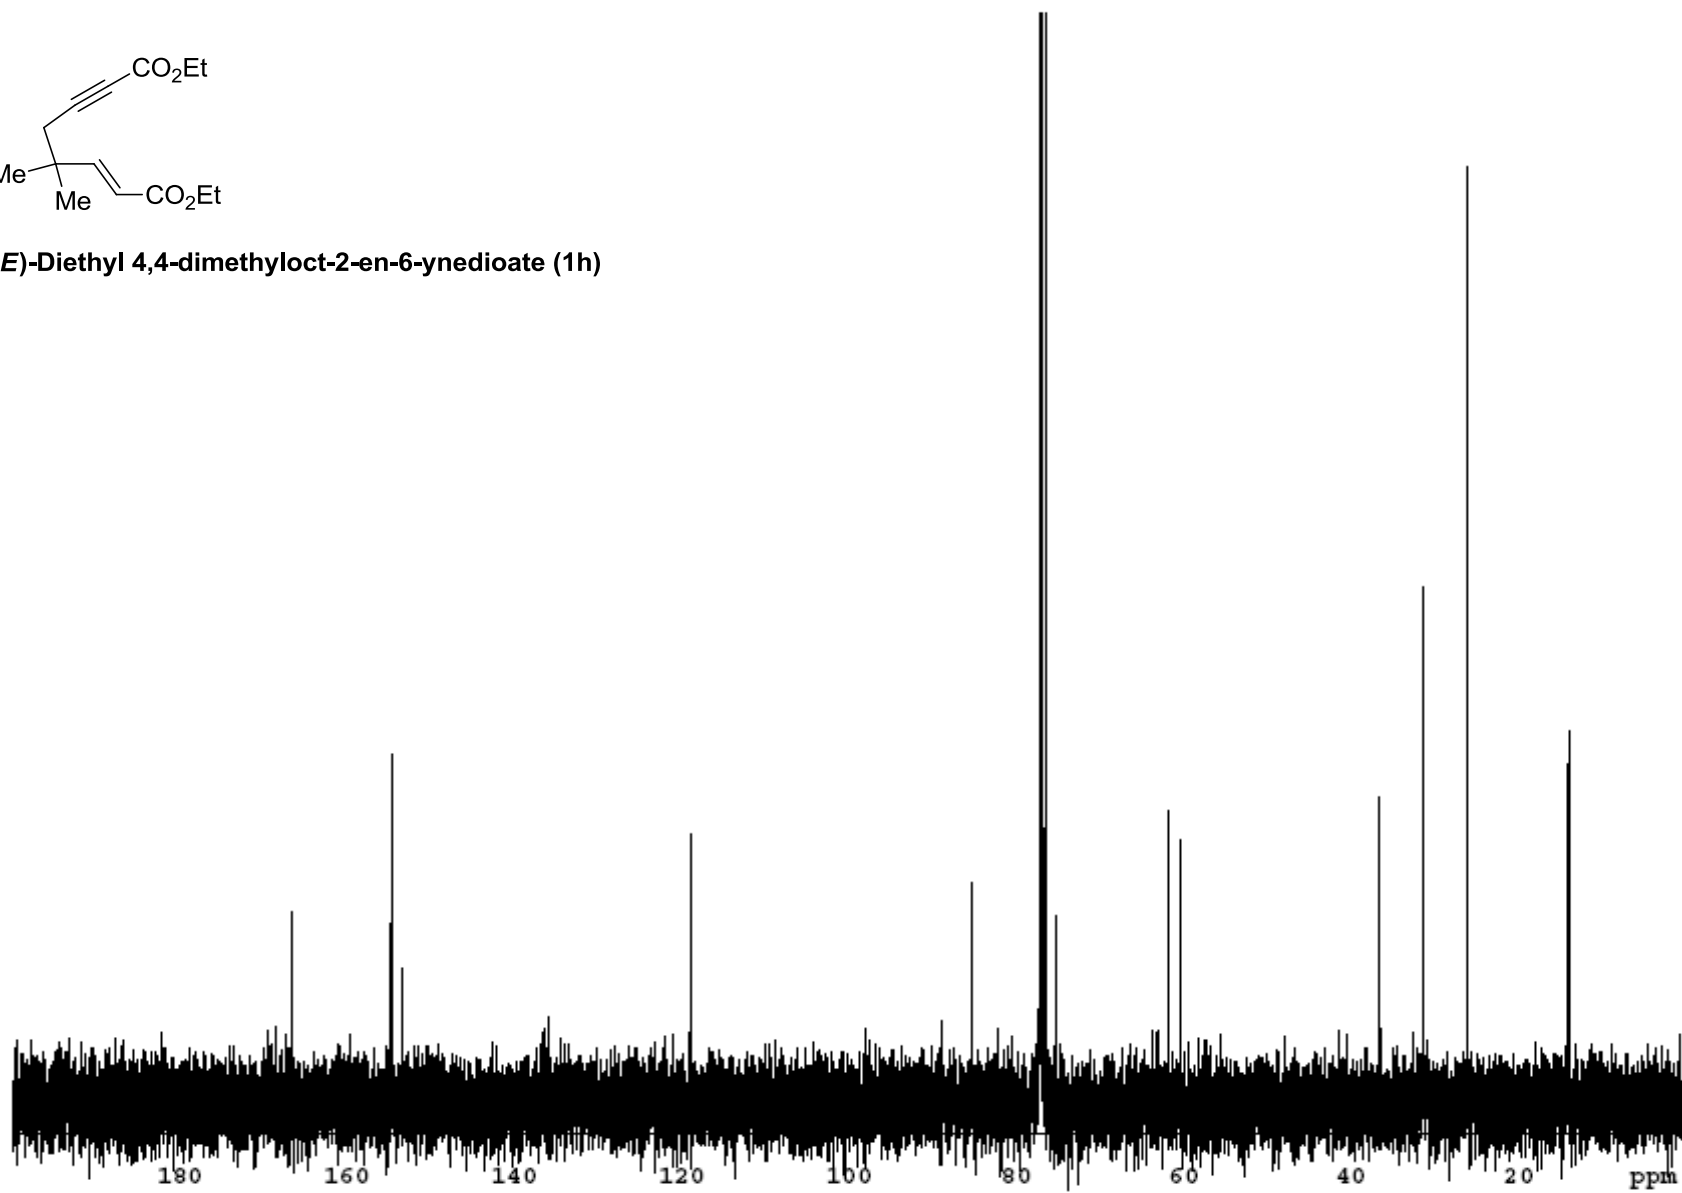



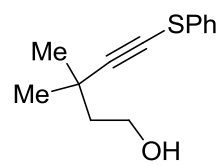

**3,3-Dimethyl-5-phenylsulfanyl-pent-4-yn-1-ol (7)**

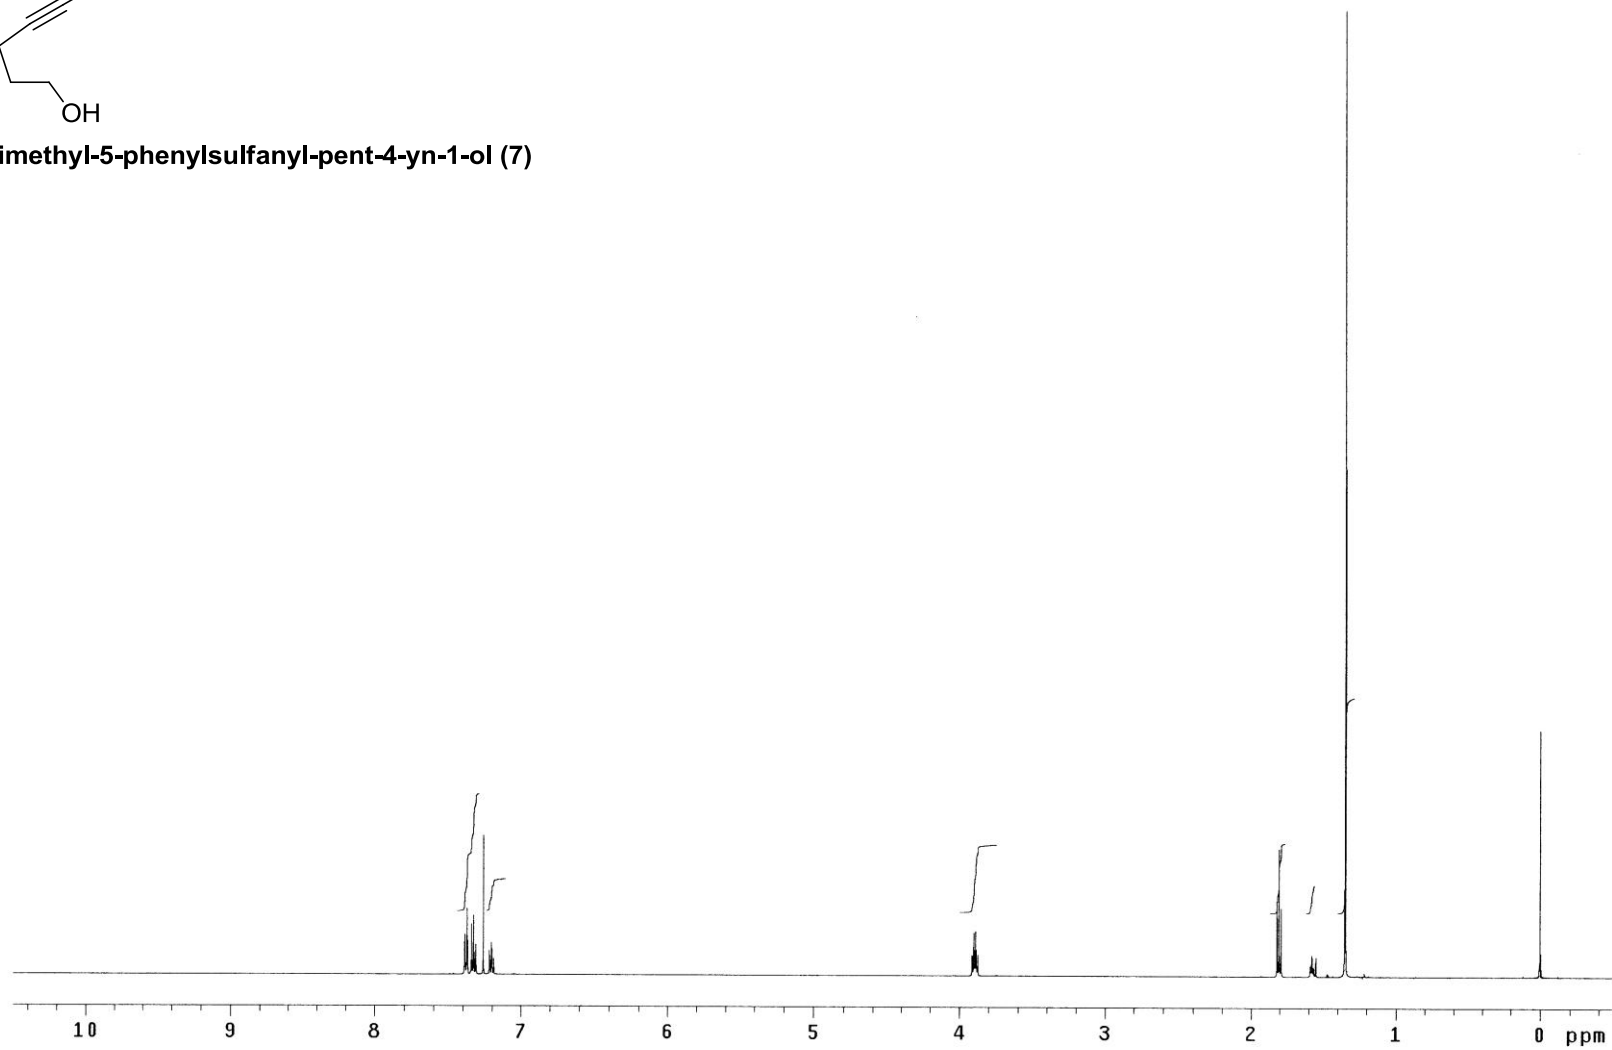

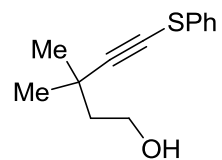

**3,3-Dimethyl-5-phenylsulfanyl-pent-4-yn-1-ol (7)**

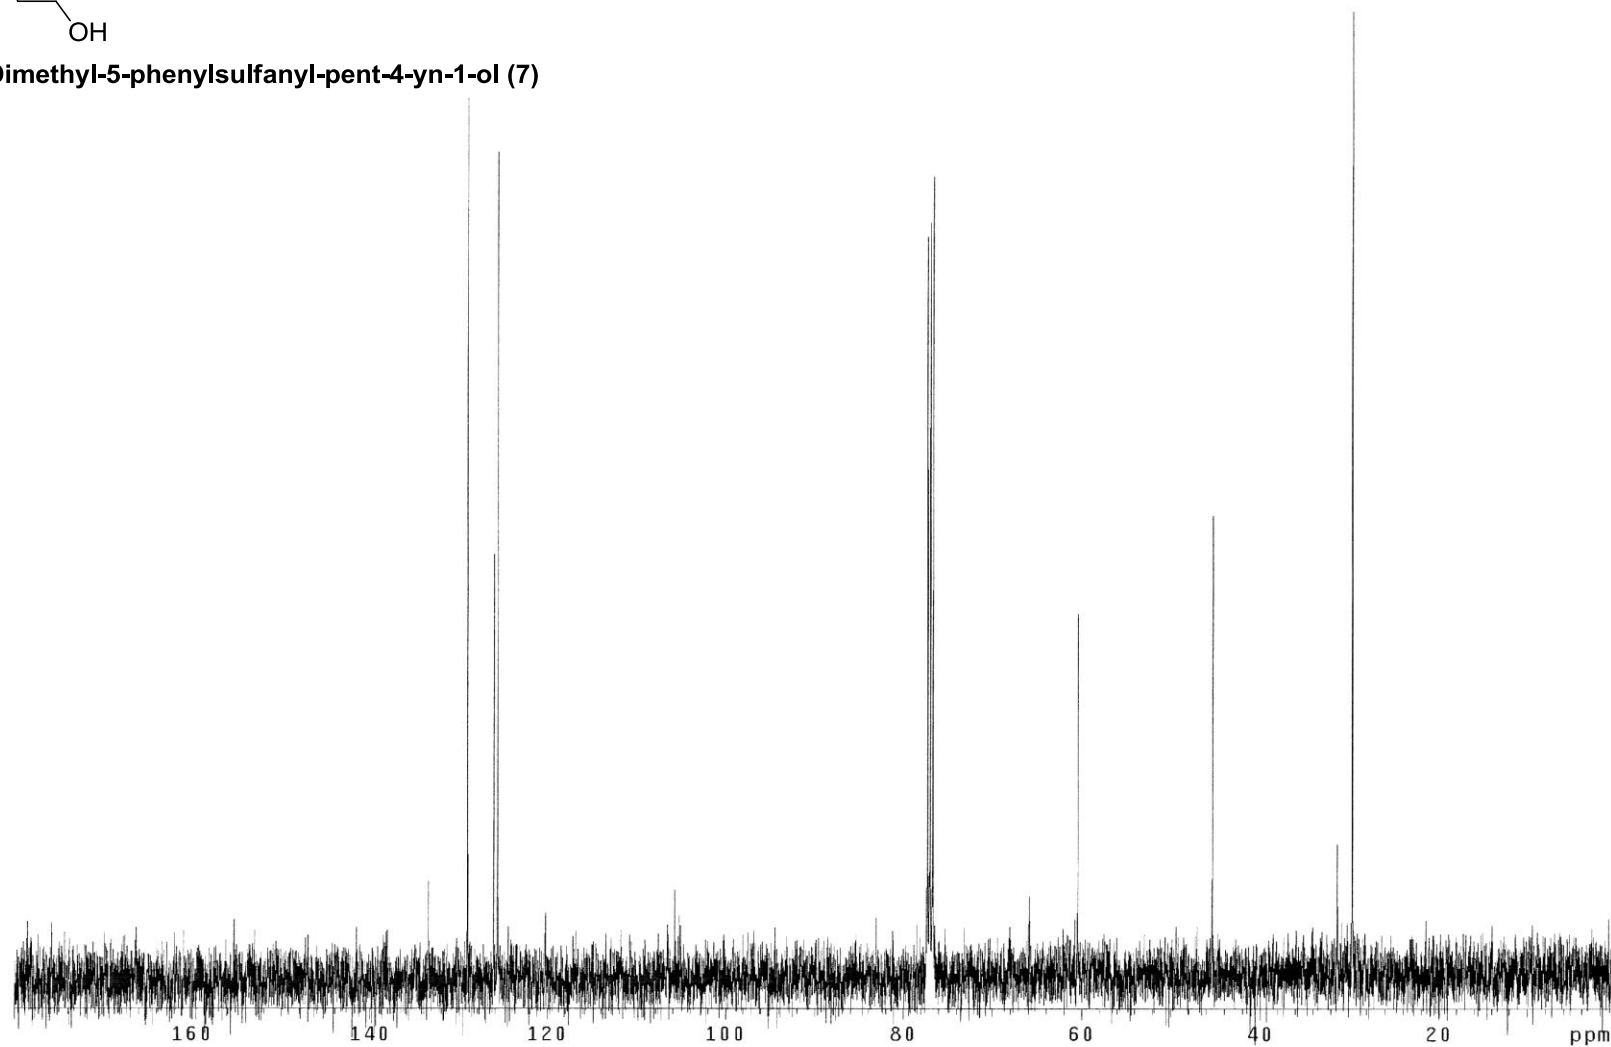

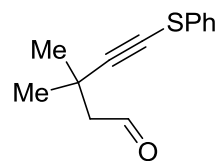

**3,3-dimethyl-5-(phenylthio)pent-4-ynal**

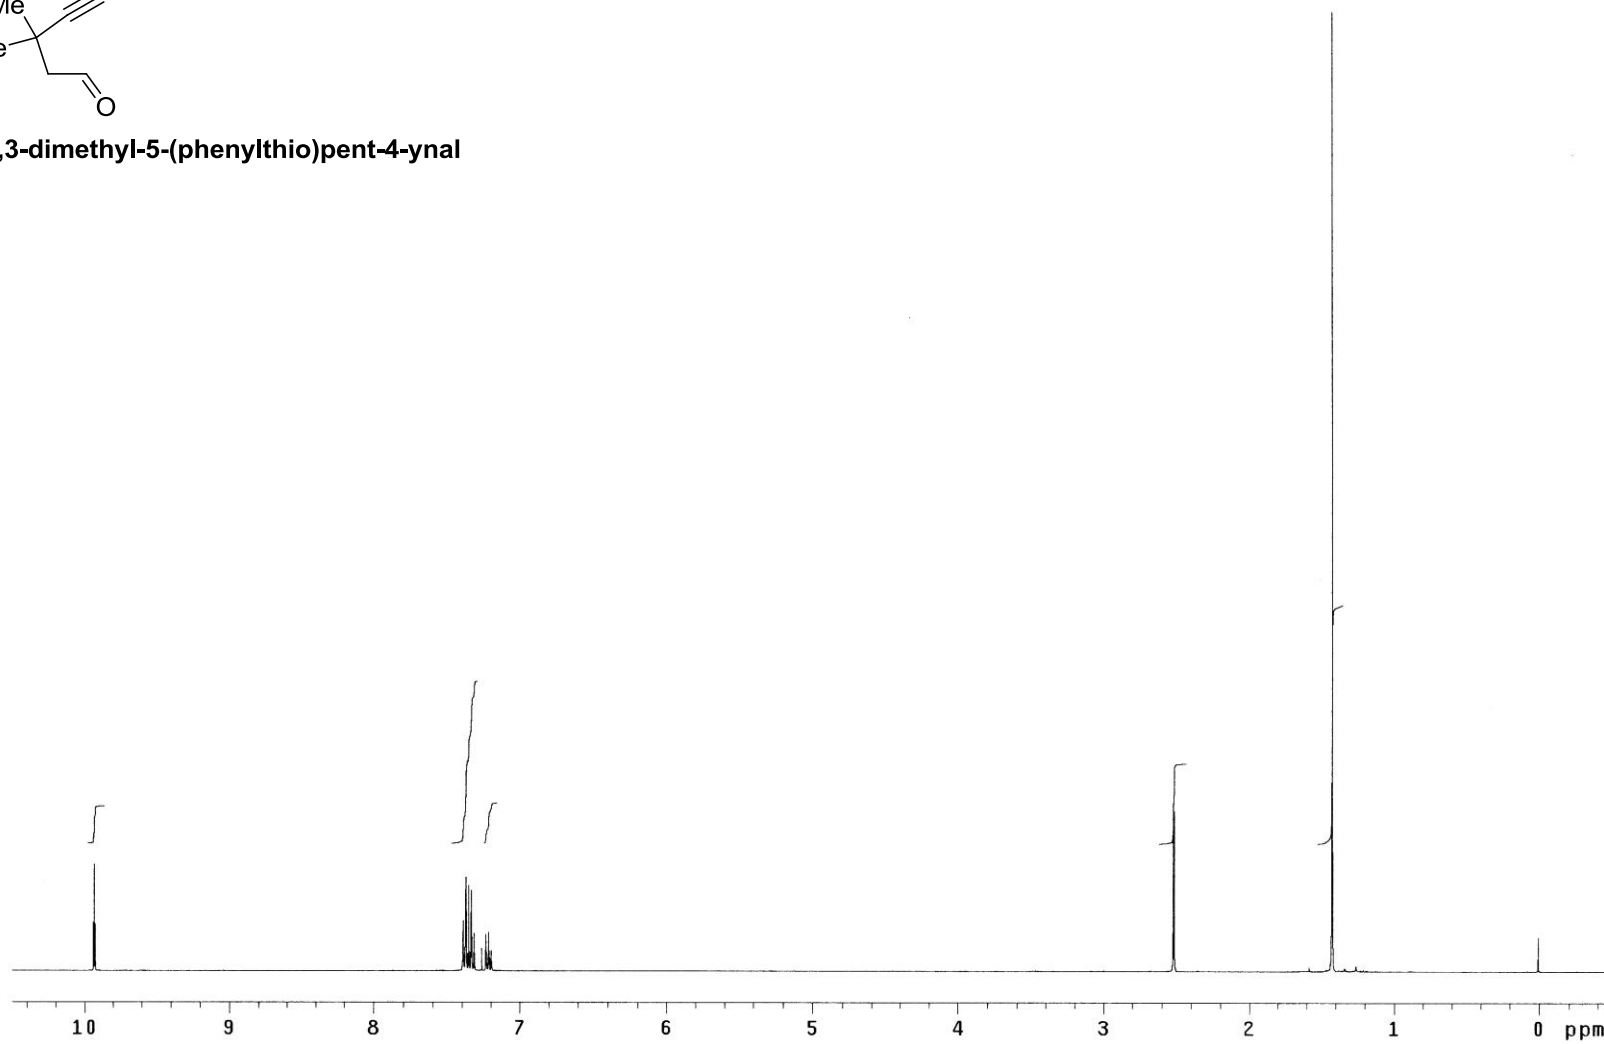

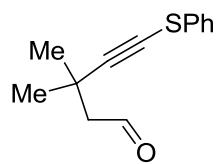

**3,3-dimethyl-5-(phenylthio)pent-4-ynal**

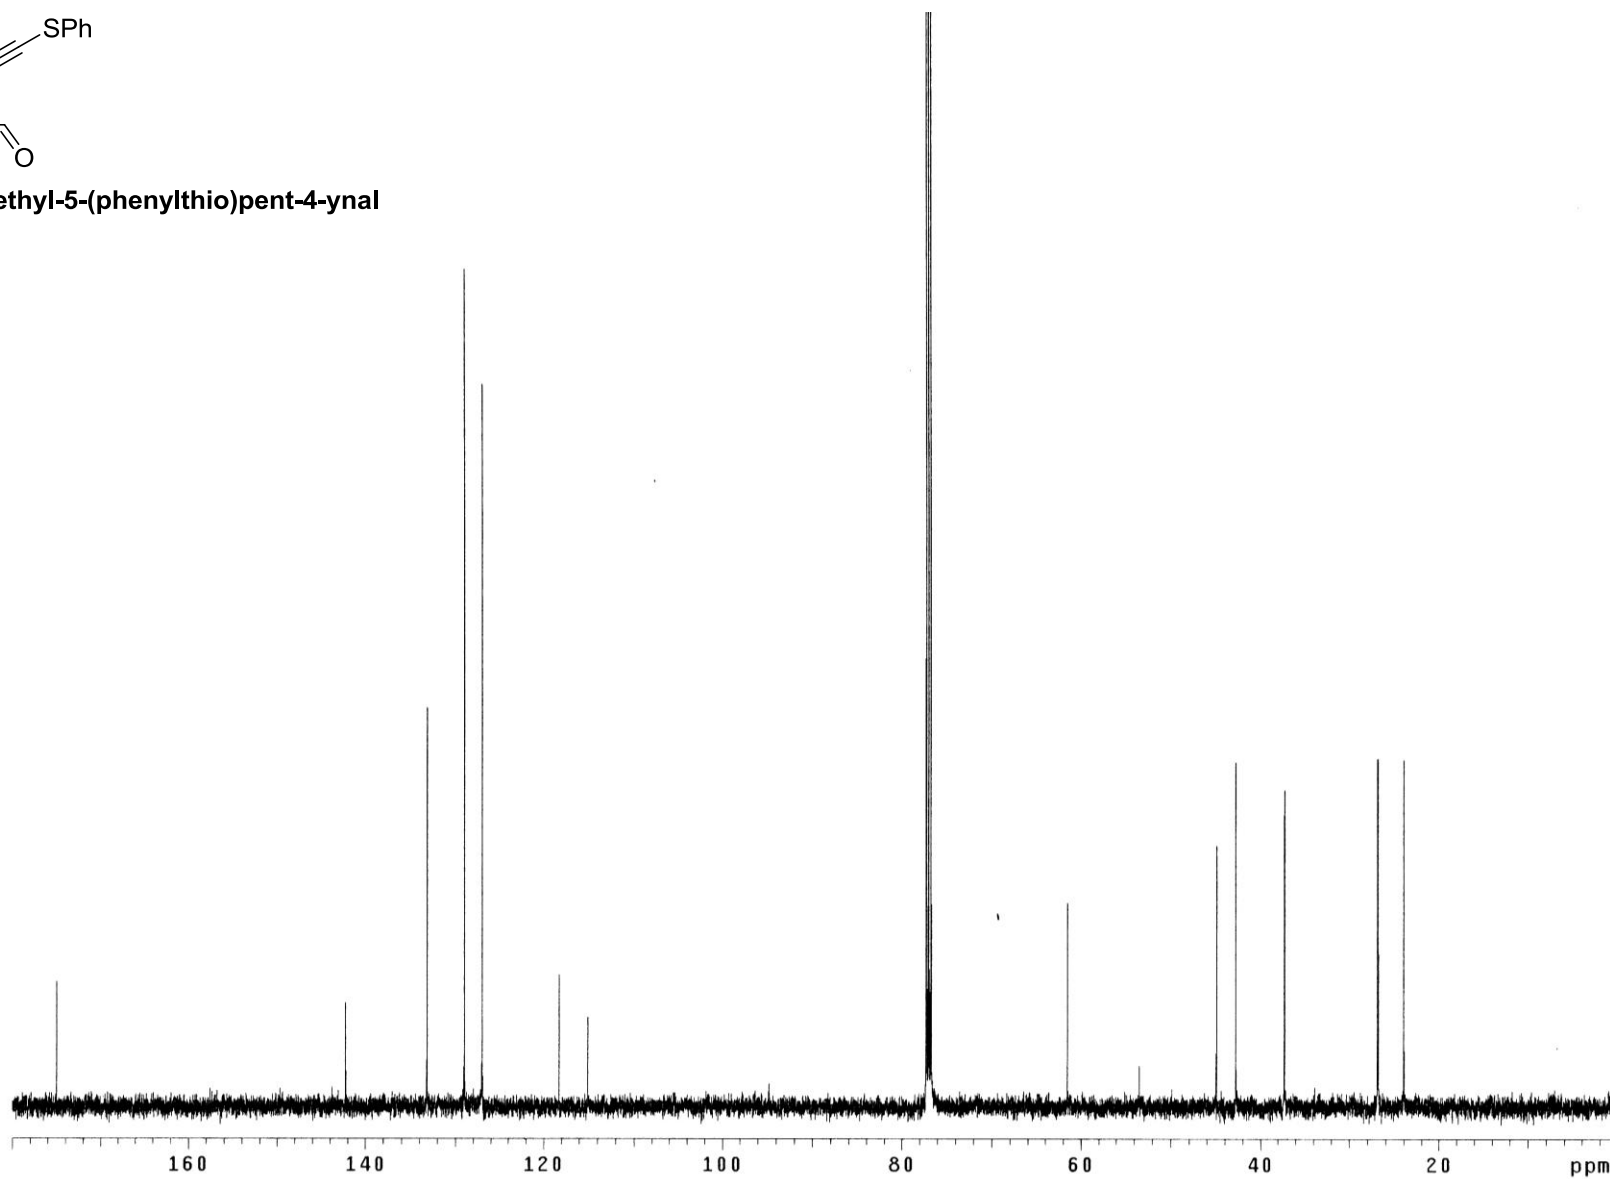

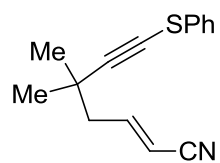

**(E)-5,5-dimethyl-7-(phenylthio)hept-2-en-6-ynenitrile**

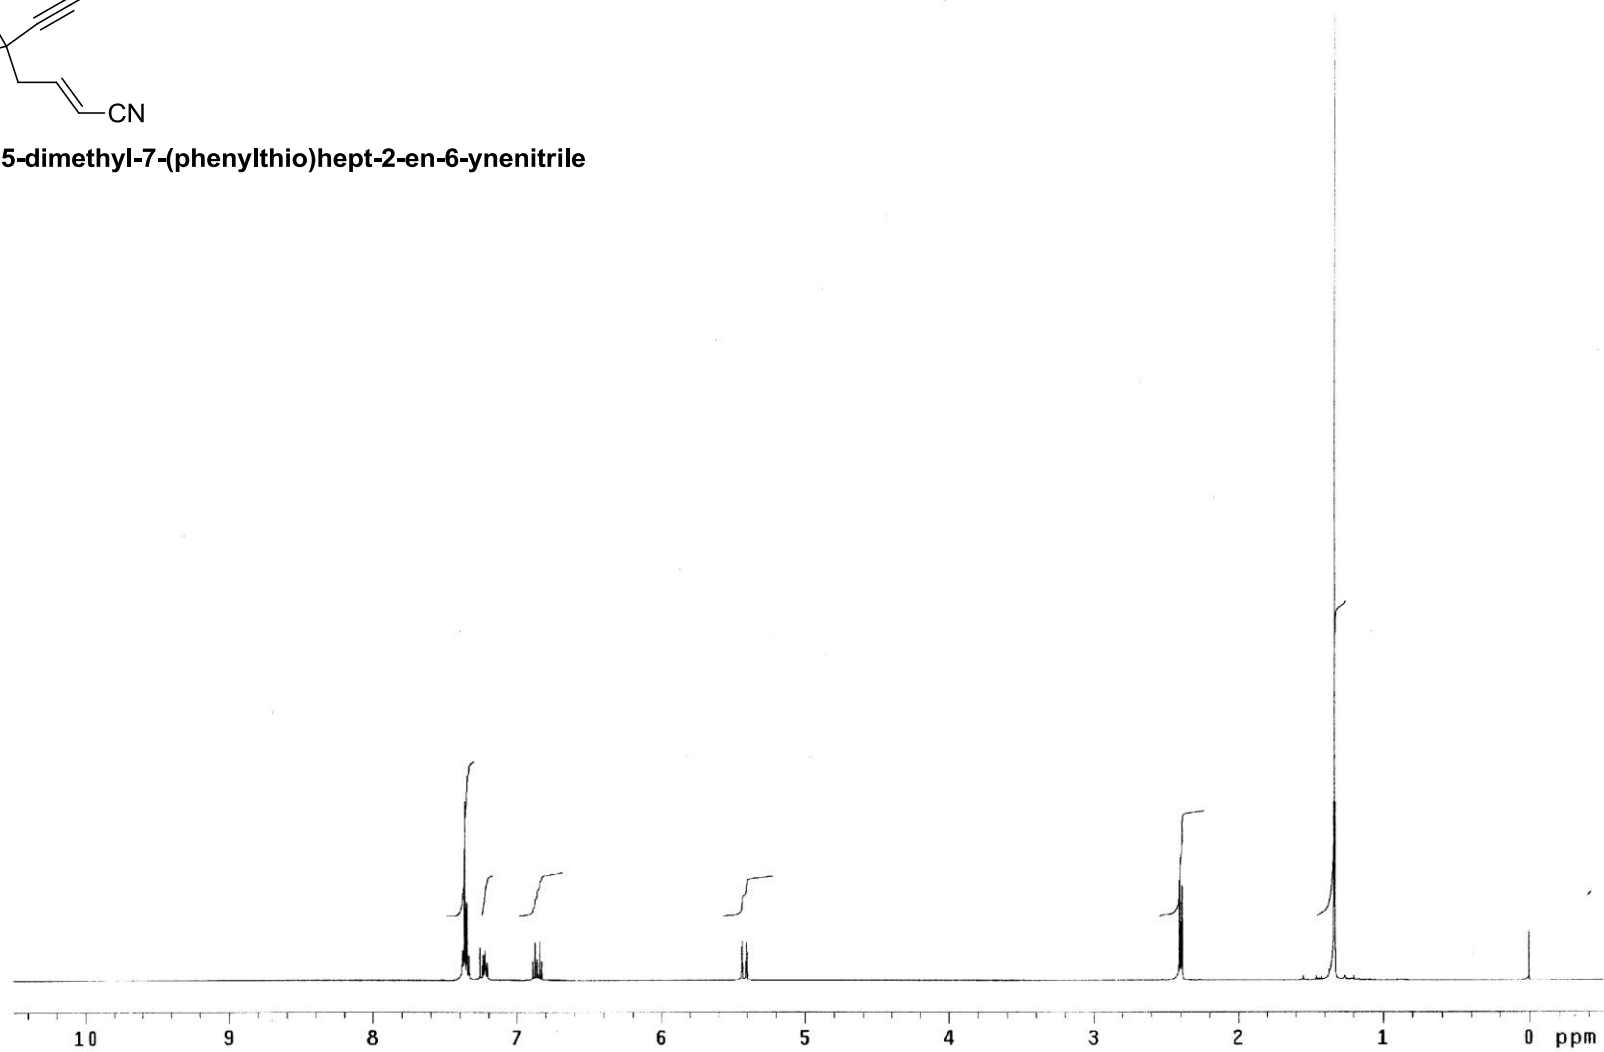

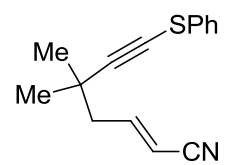

**(E)-5,5-dimethyl-7-(phenylthio)hept-2-en-6-ynenitrile**

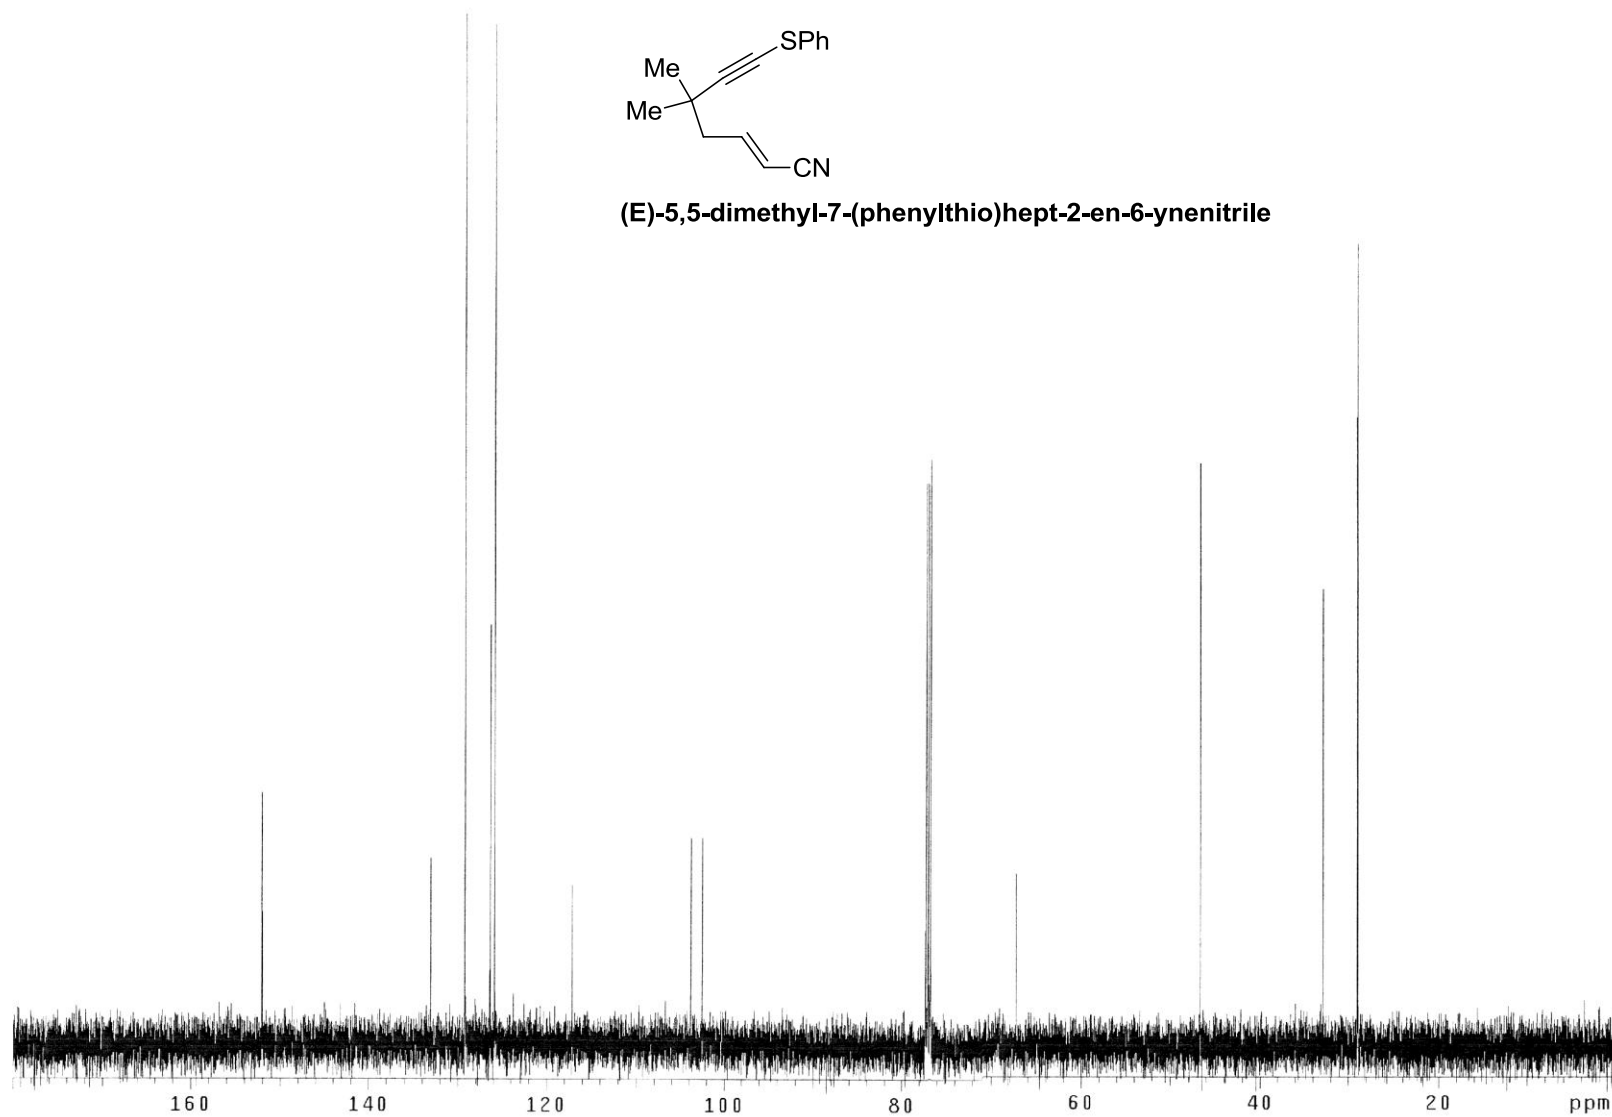

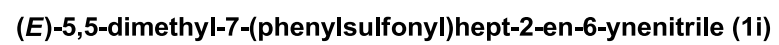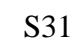

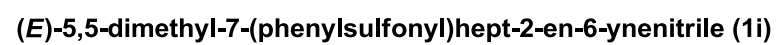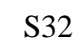



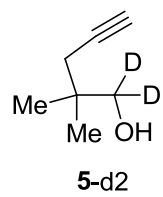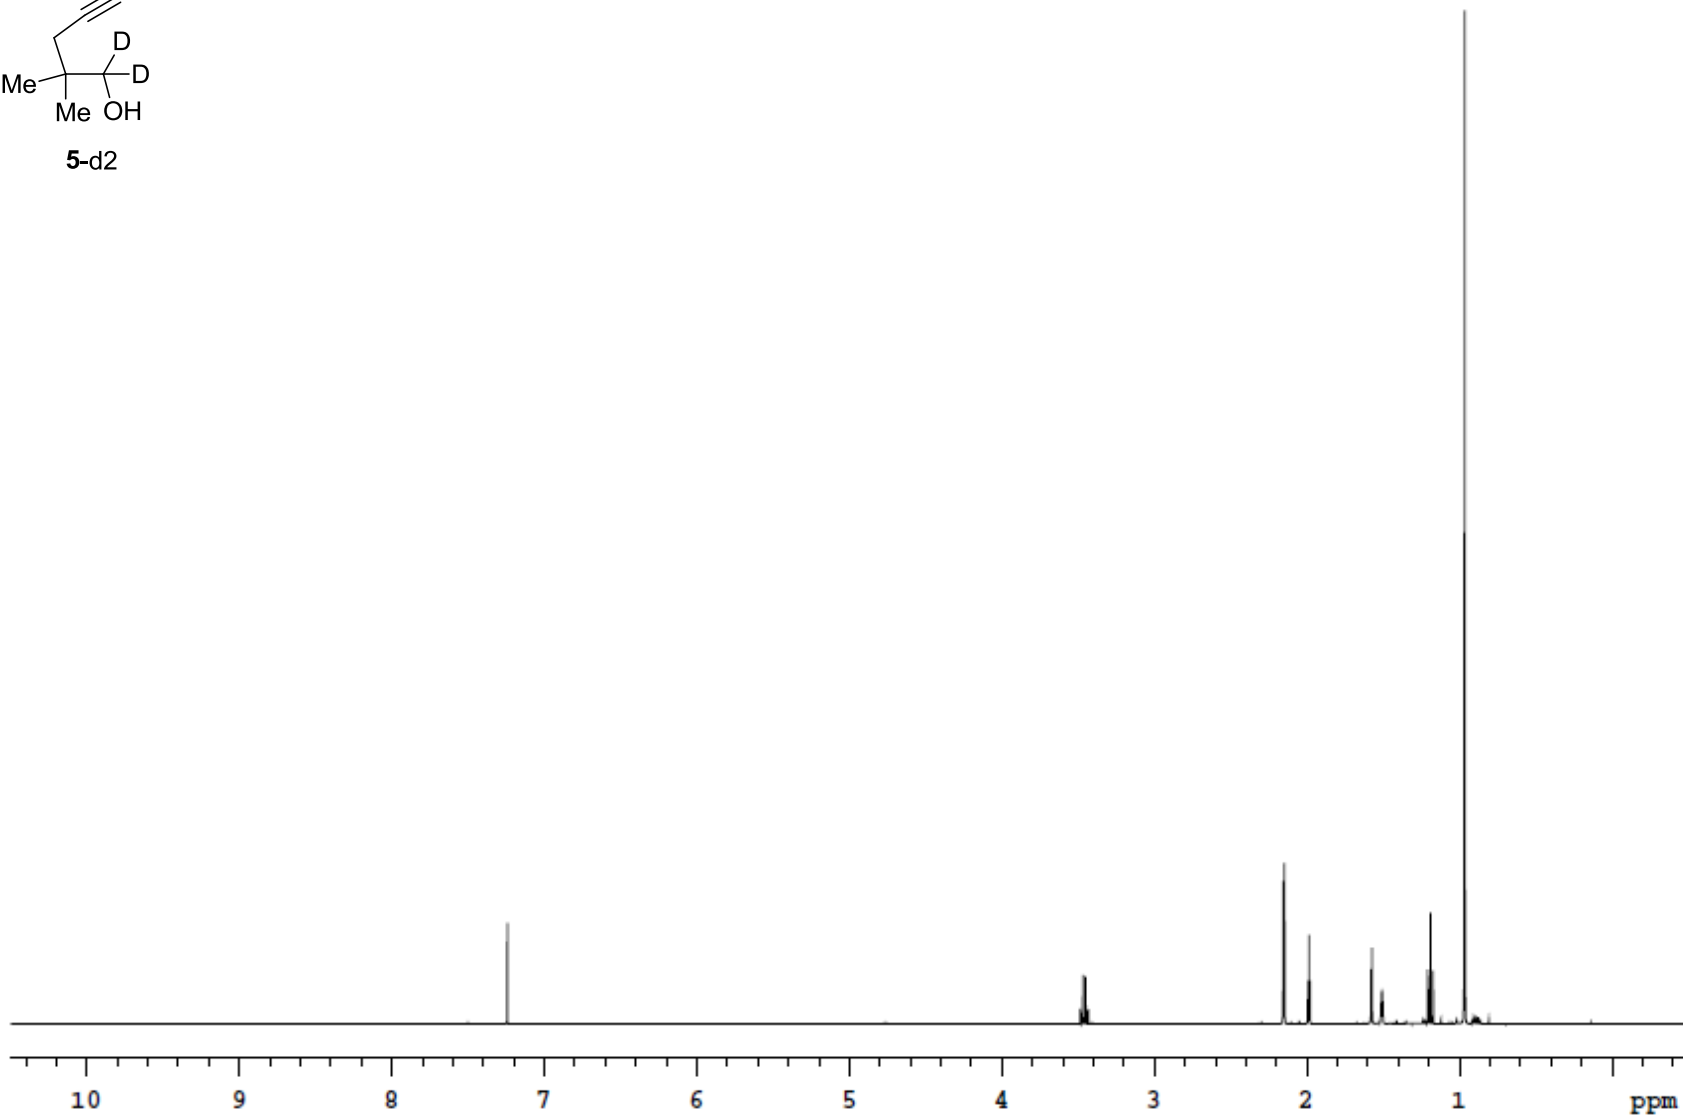

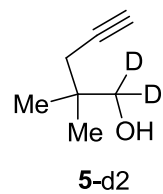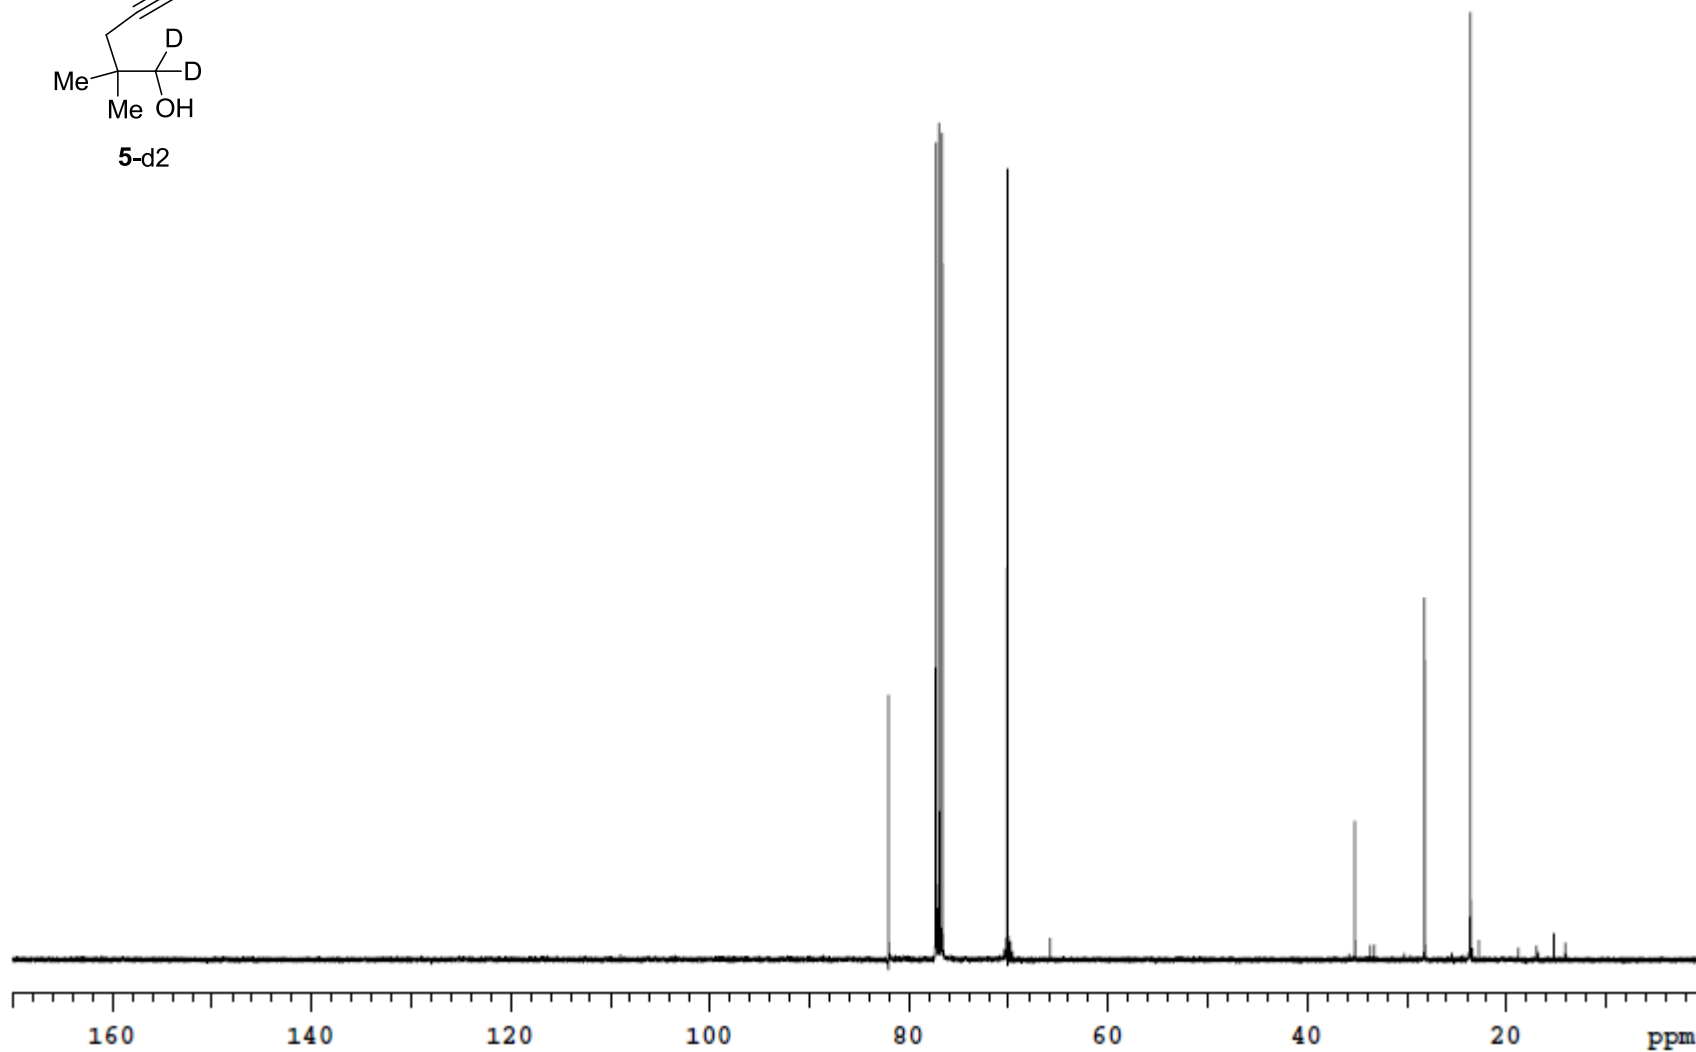

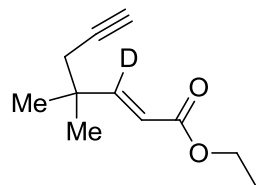

**(E)-diethyl 4,4-dimethyloct-2-en-6-ynedioate-(3-d1) (10)**

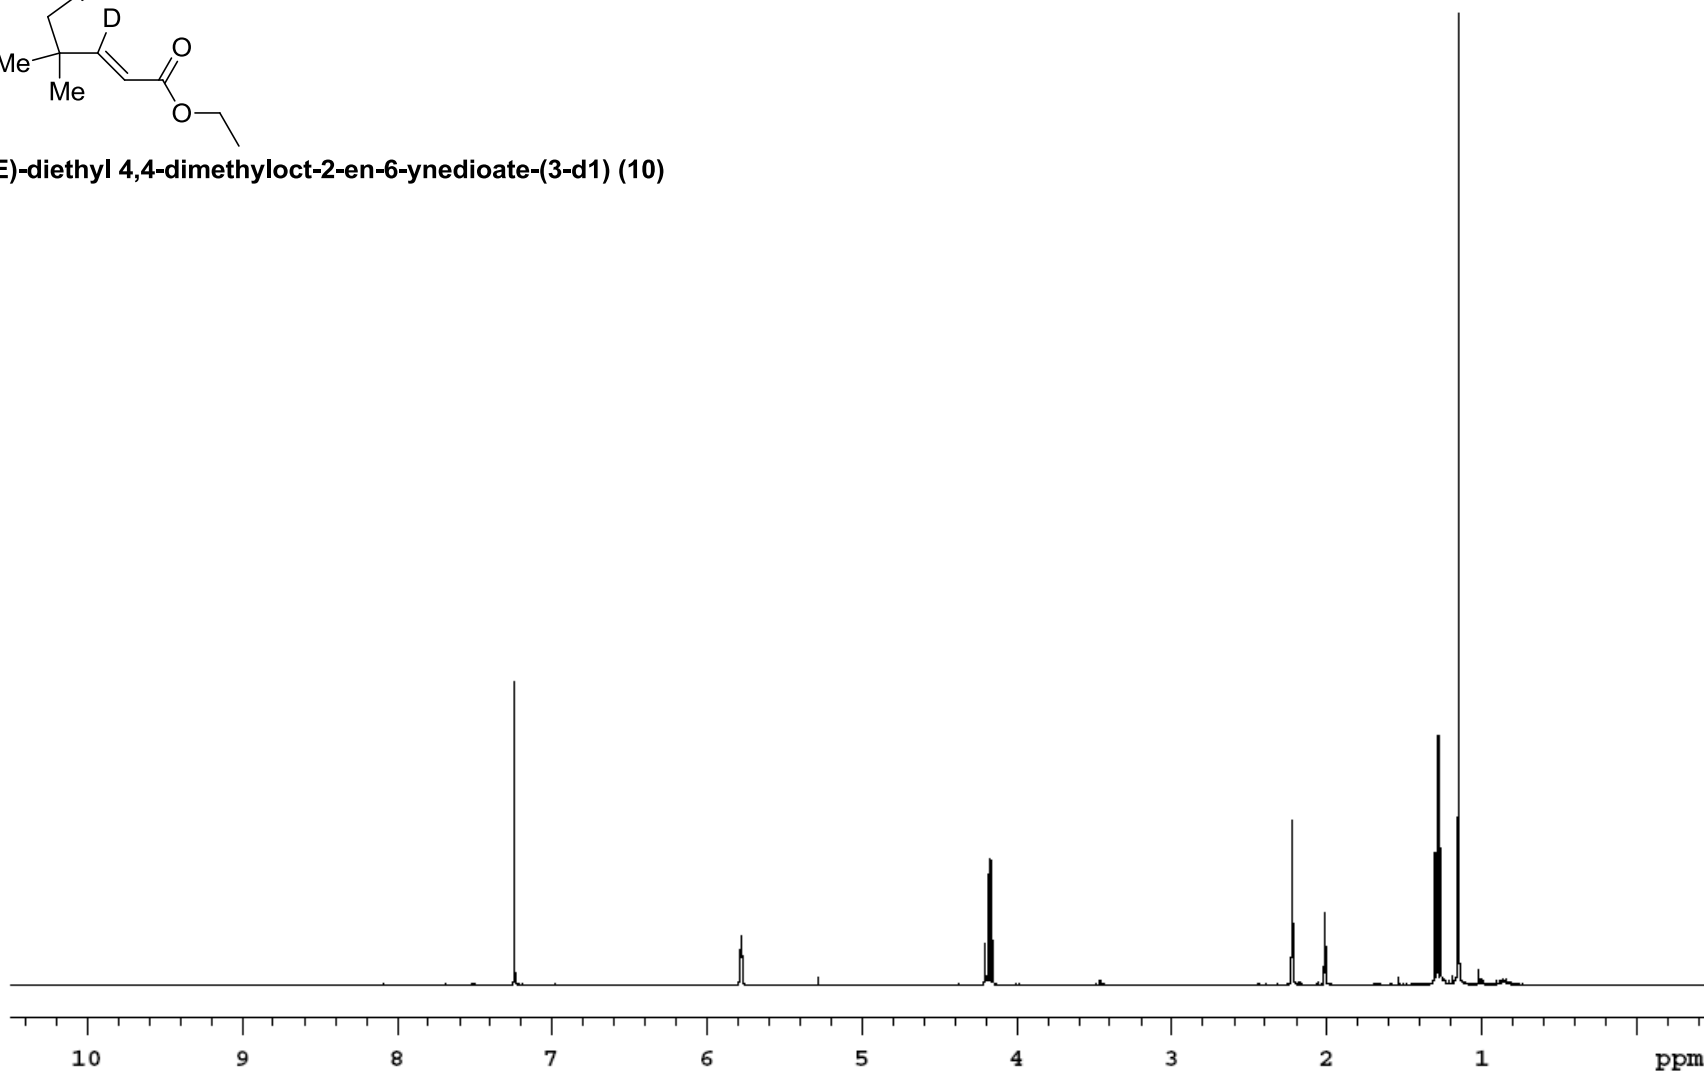

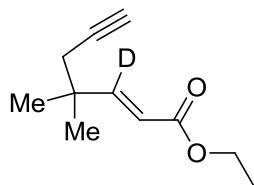

**(E)-diethyl 4,4-dimethyloct-2-en-6-ynedioate-(3-d1) (10)**

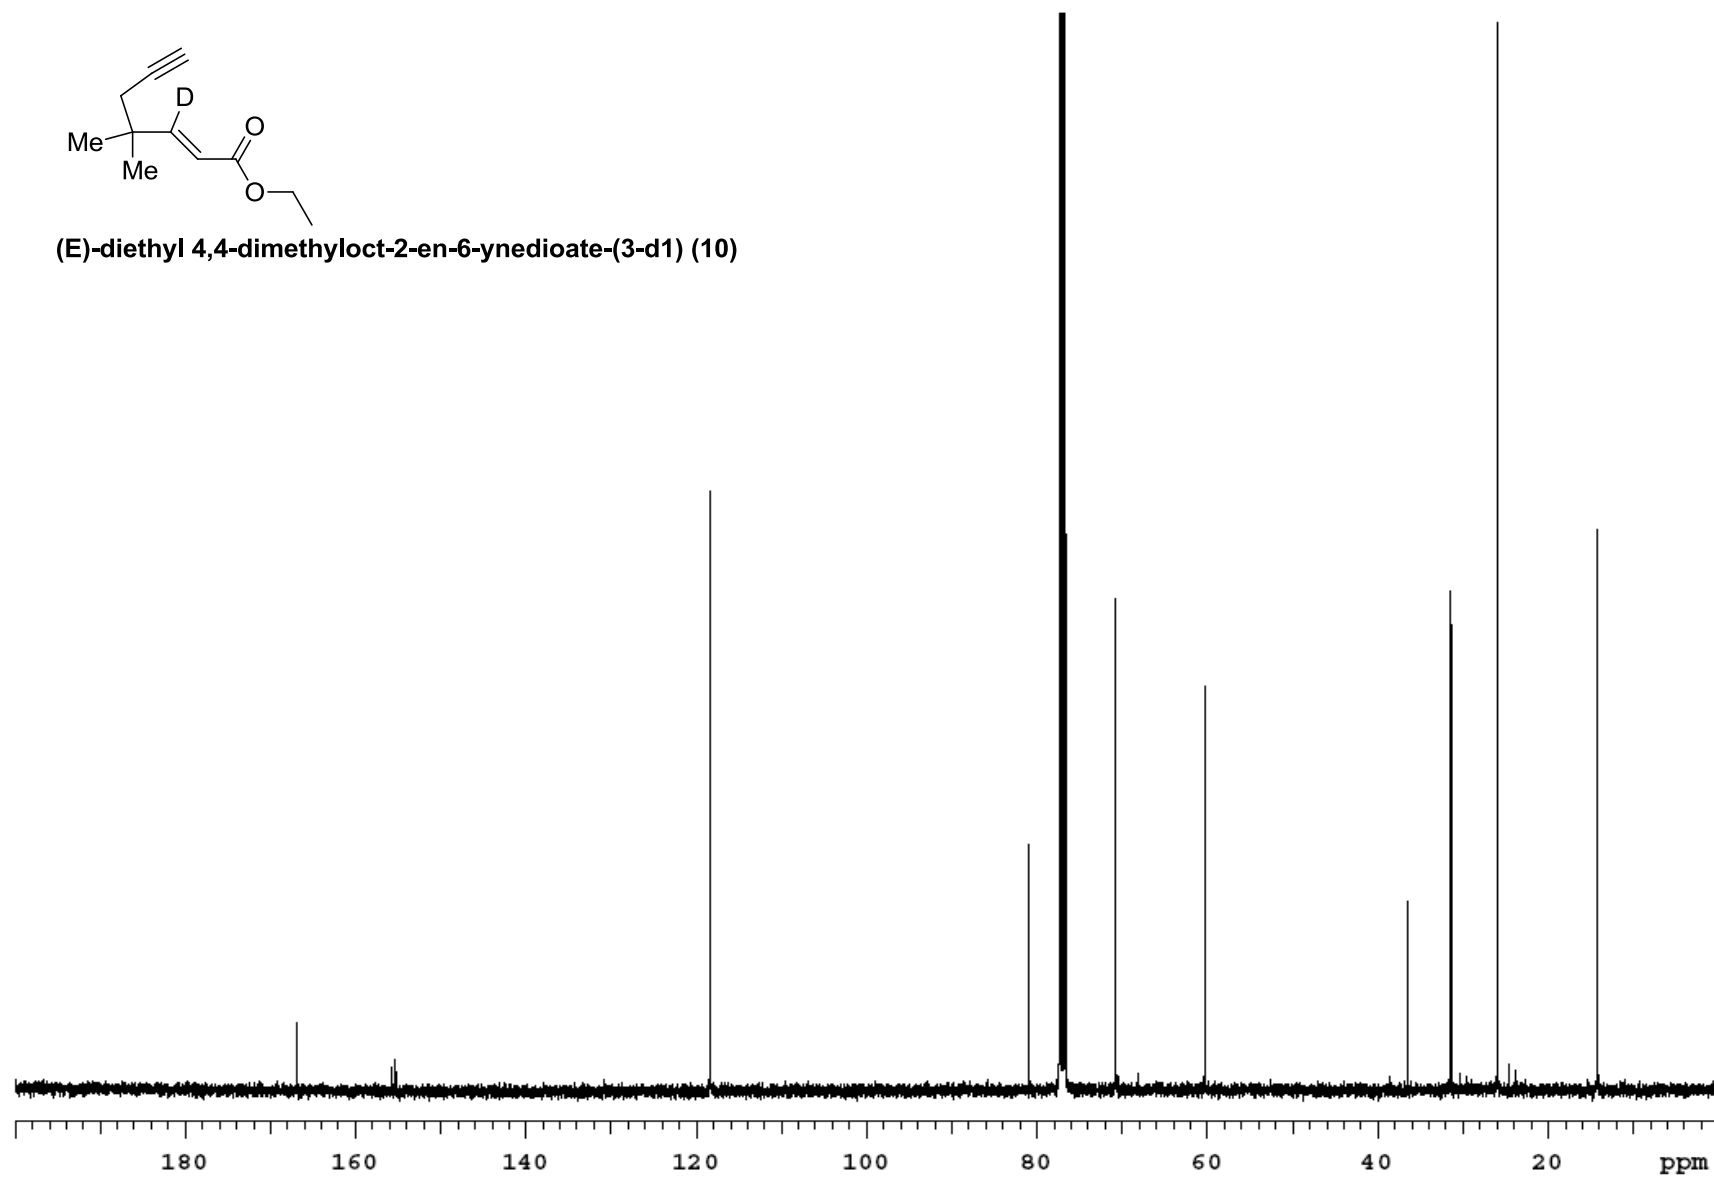

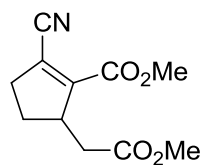

**Methyl 2-cyano-5-(2-methoxy-2-oxoethyl)cyclopent-1-enecarboxylate  
(2a)**

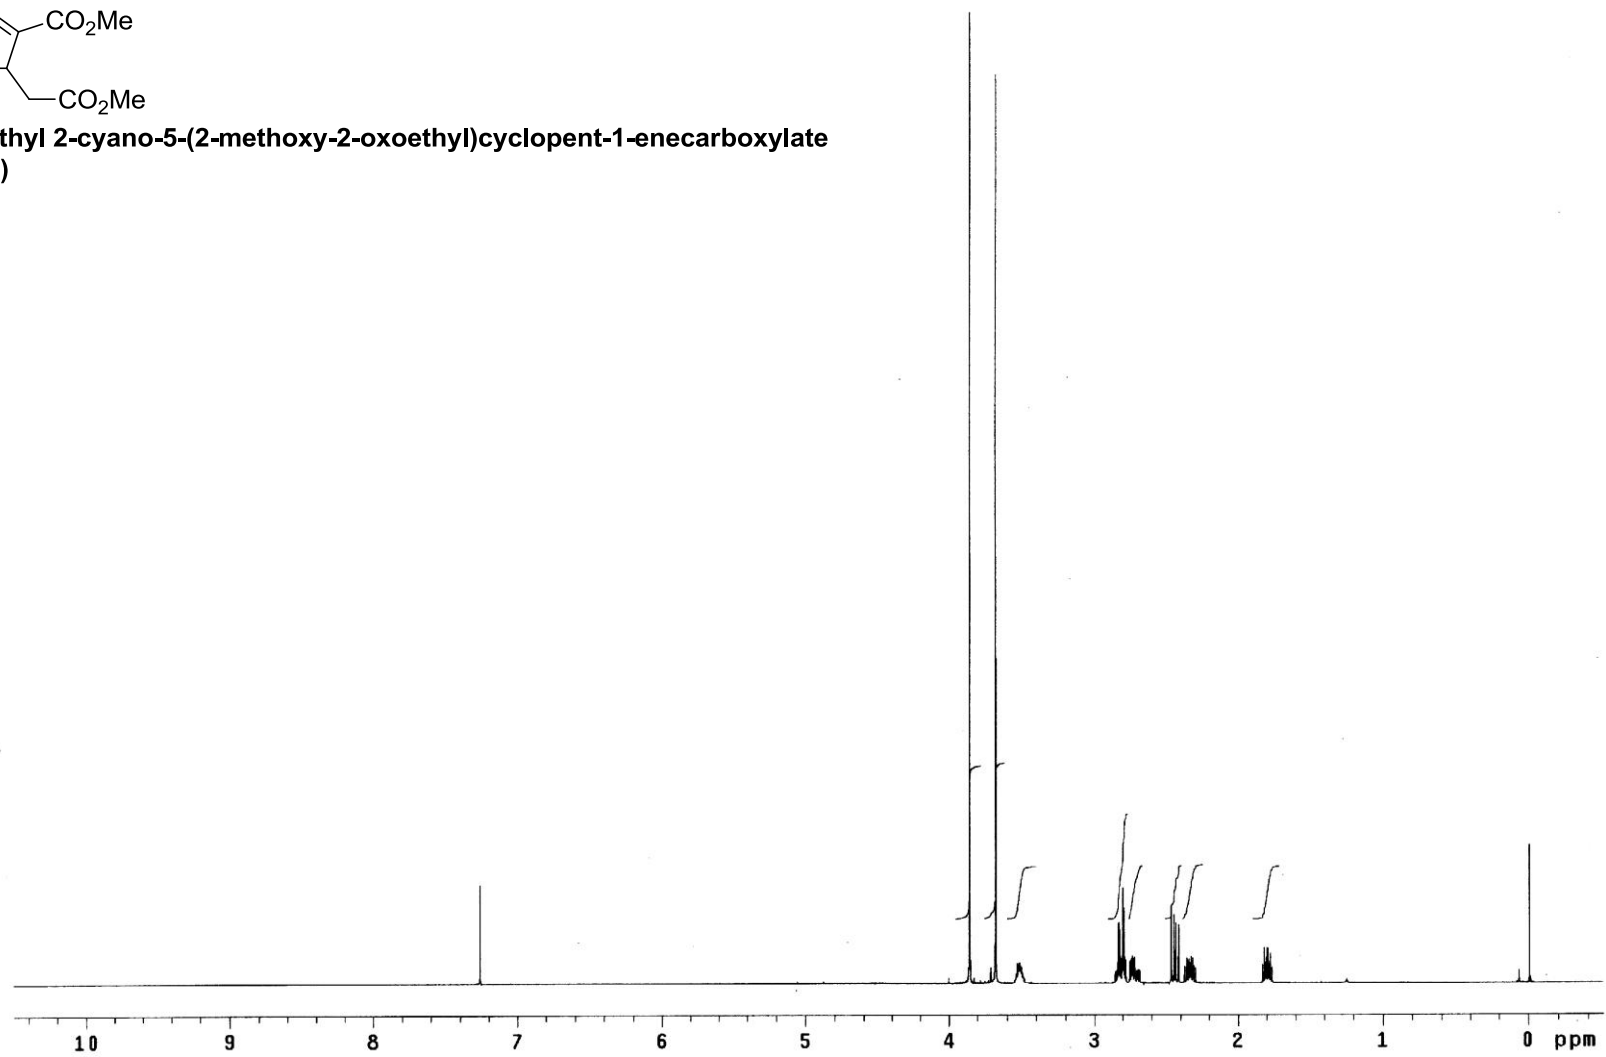

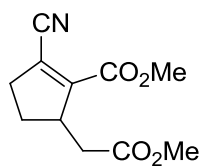

**Methyl 2-cyano-5-(2-methoxy-2-oxoethyl)cyclopent-1-enecarboxylate (2a)**

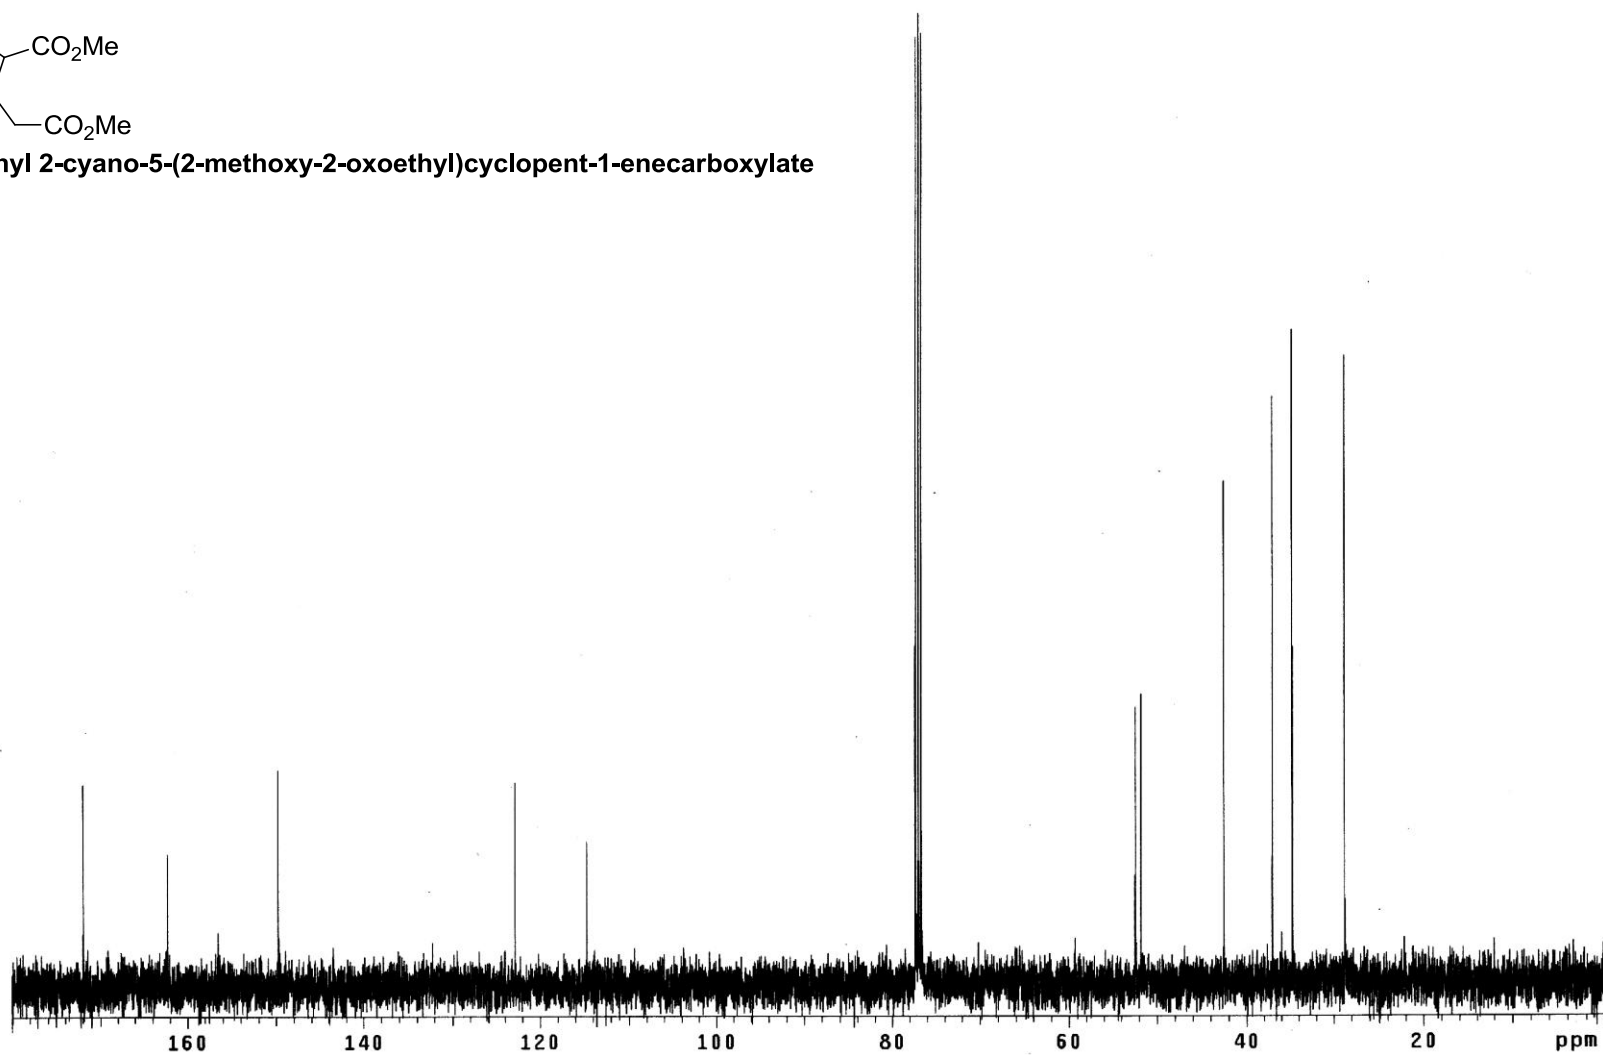

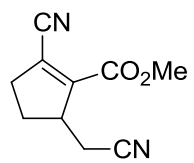

**methyl 2-cyano-5-(cyanomethyl)cyclopent-1-enecarboxylate (2b)**

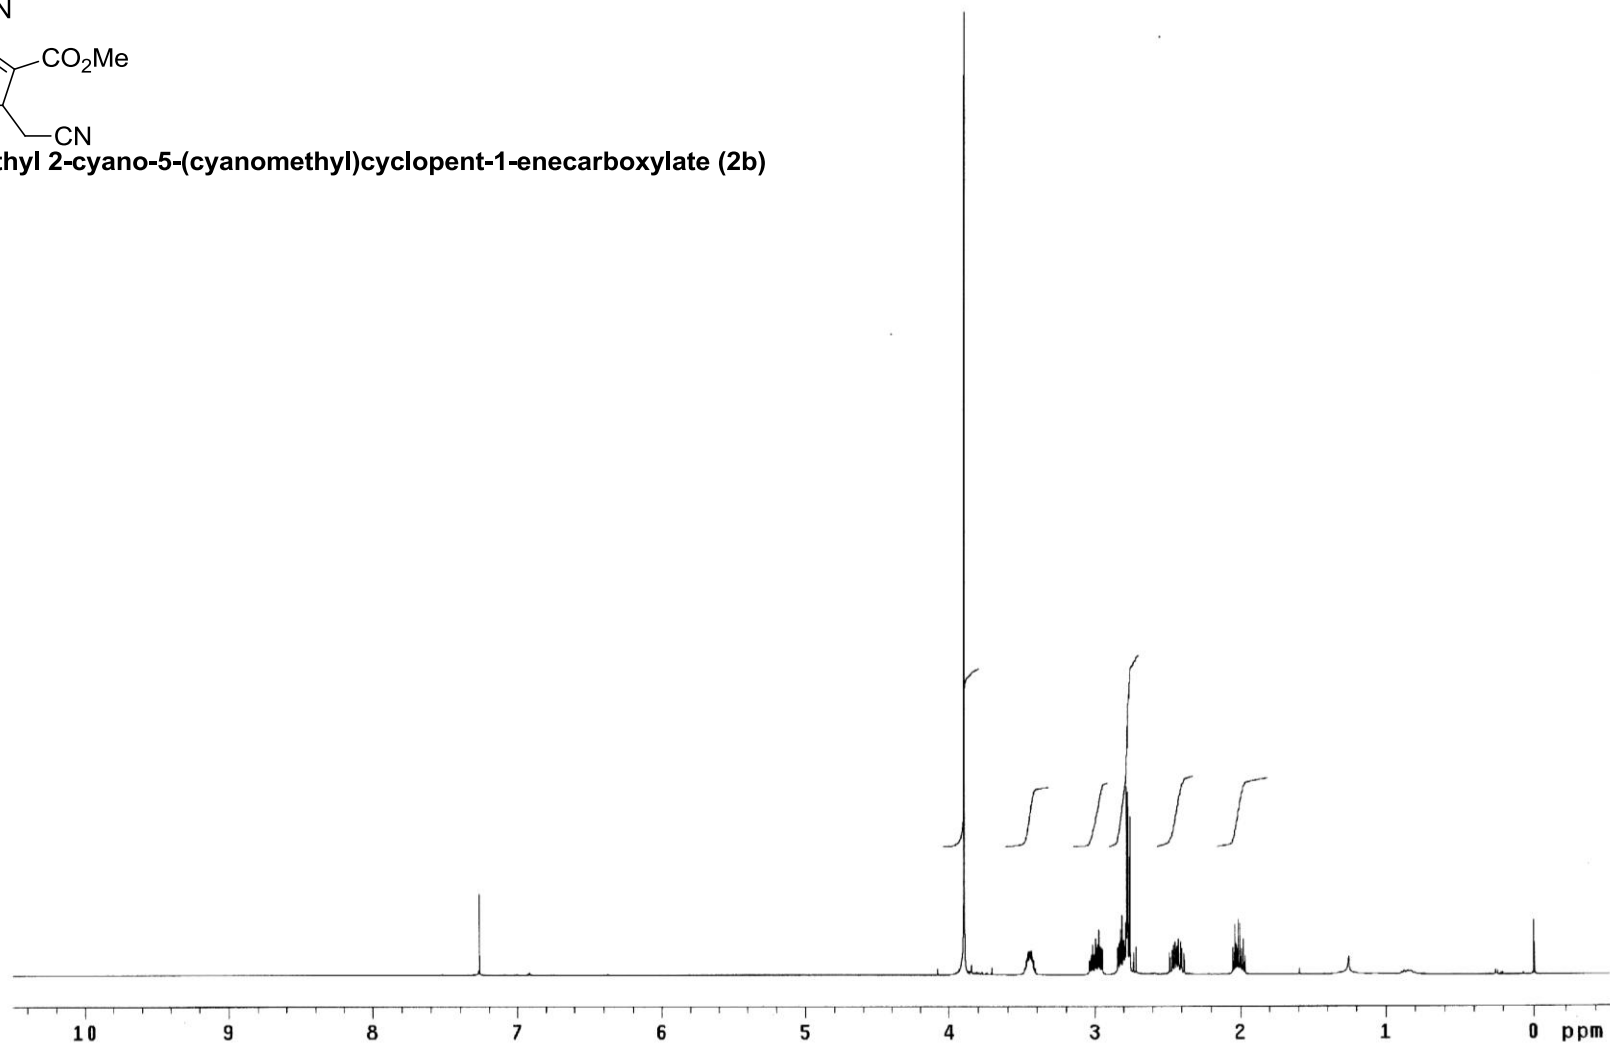

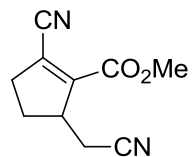

**methyl 2-cyano-5-(cyanomethyl)cyclopent-1-enecarboxylate (2b)**

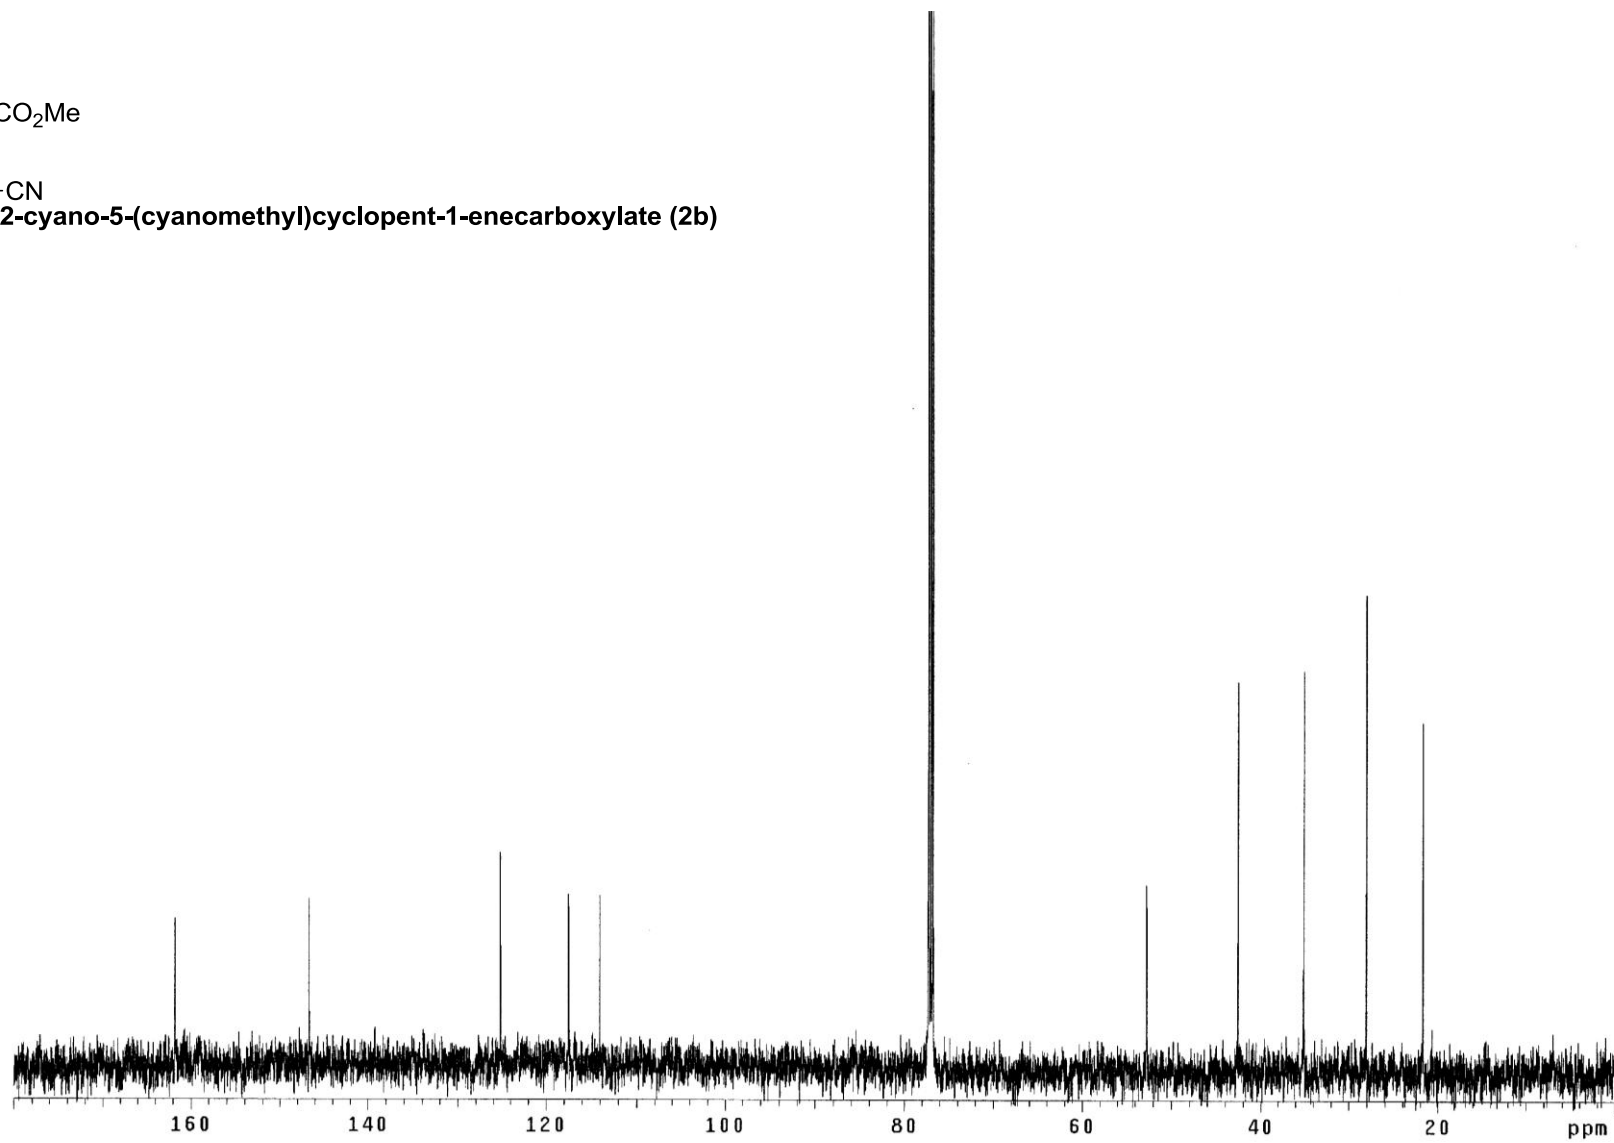



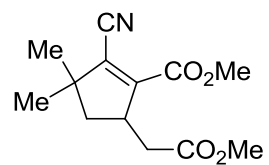

**methyl 2-cyano-5-(2-methoxy-2-oxoethyl)-3,3-dimethylcyclopent-1-enecarboxylate (2c)**

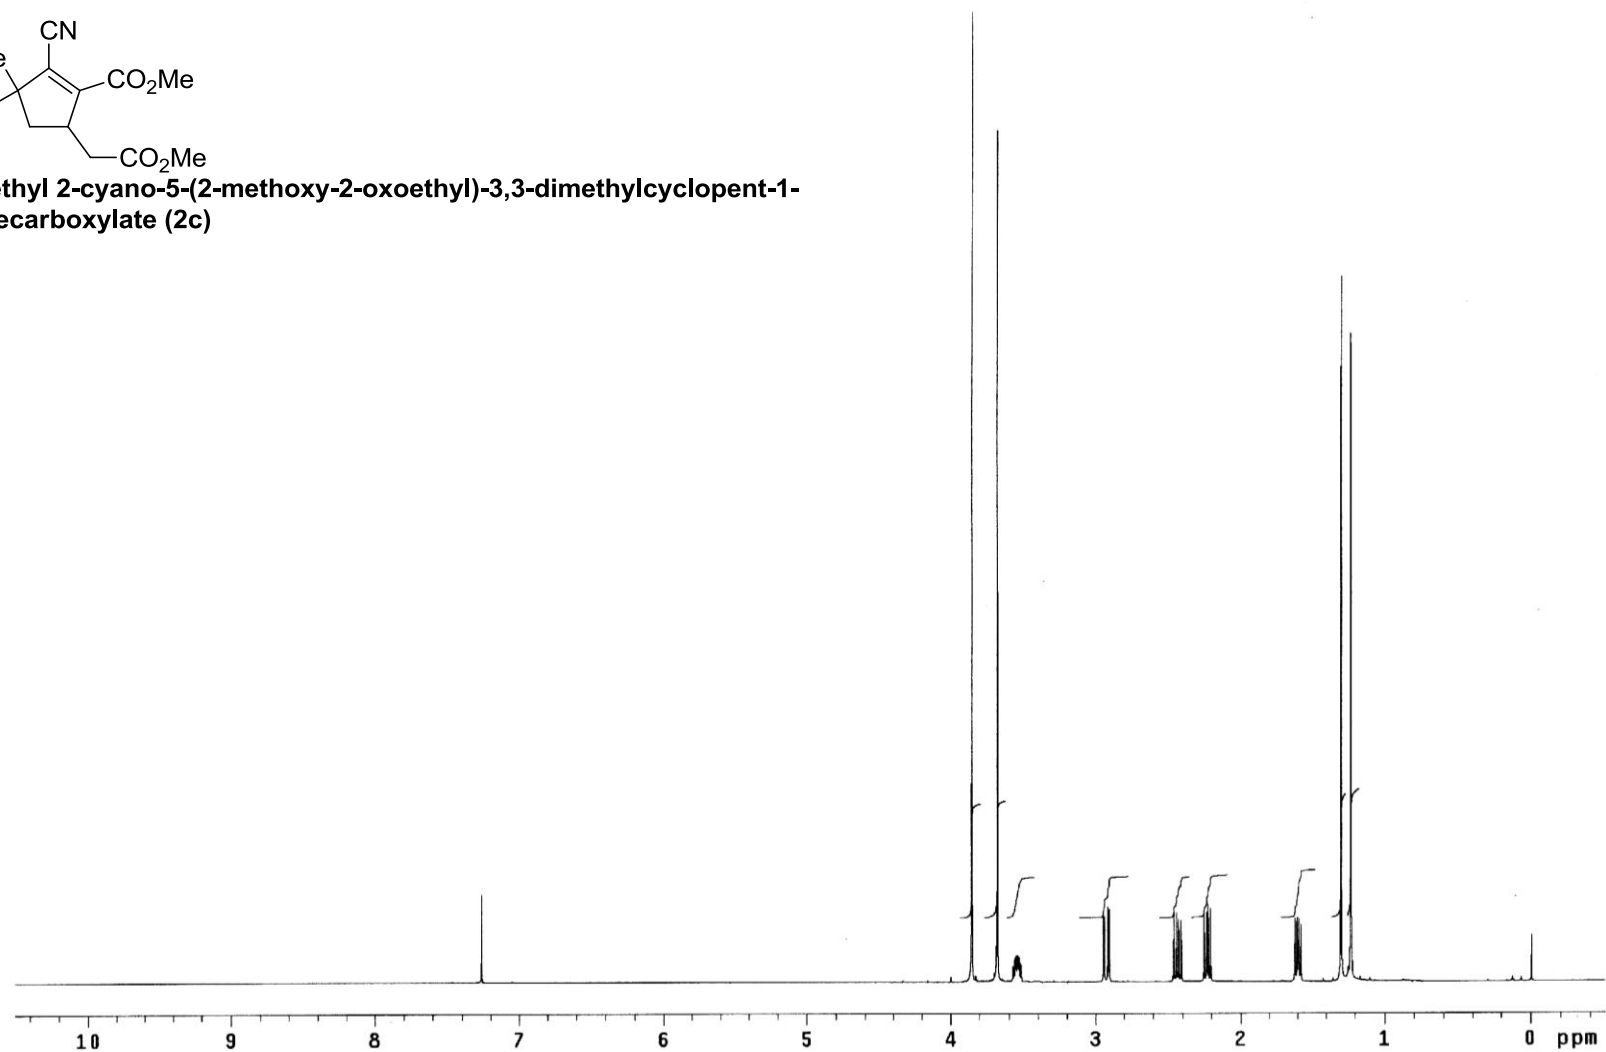

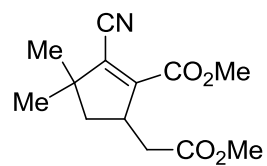

**methyl 2-cyano-5-(2-methoxy-2-oxoethyl)-3,3-dimethylcyclopent-1-enecarboxylate (2c)**

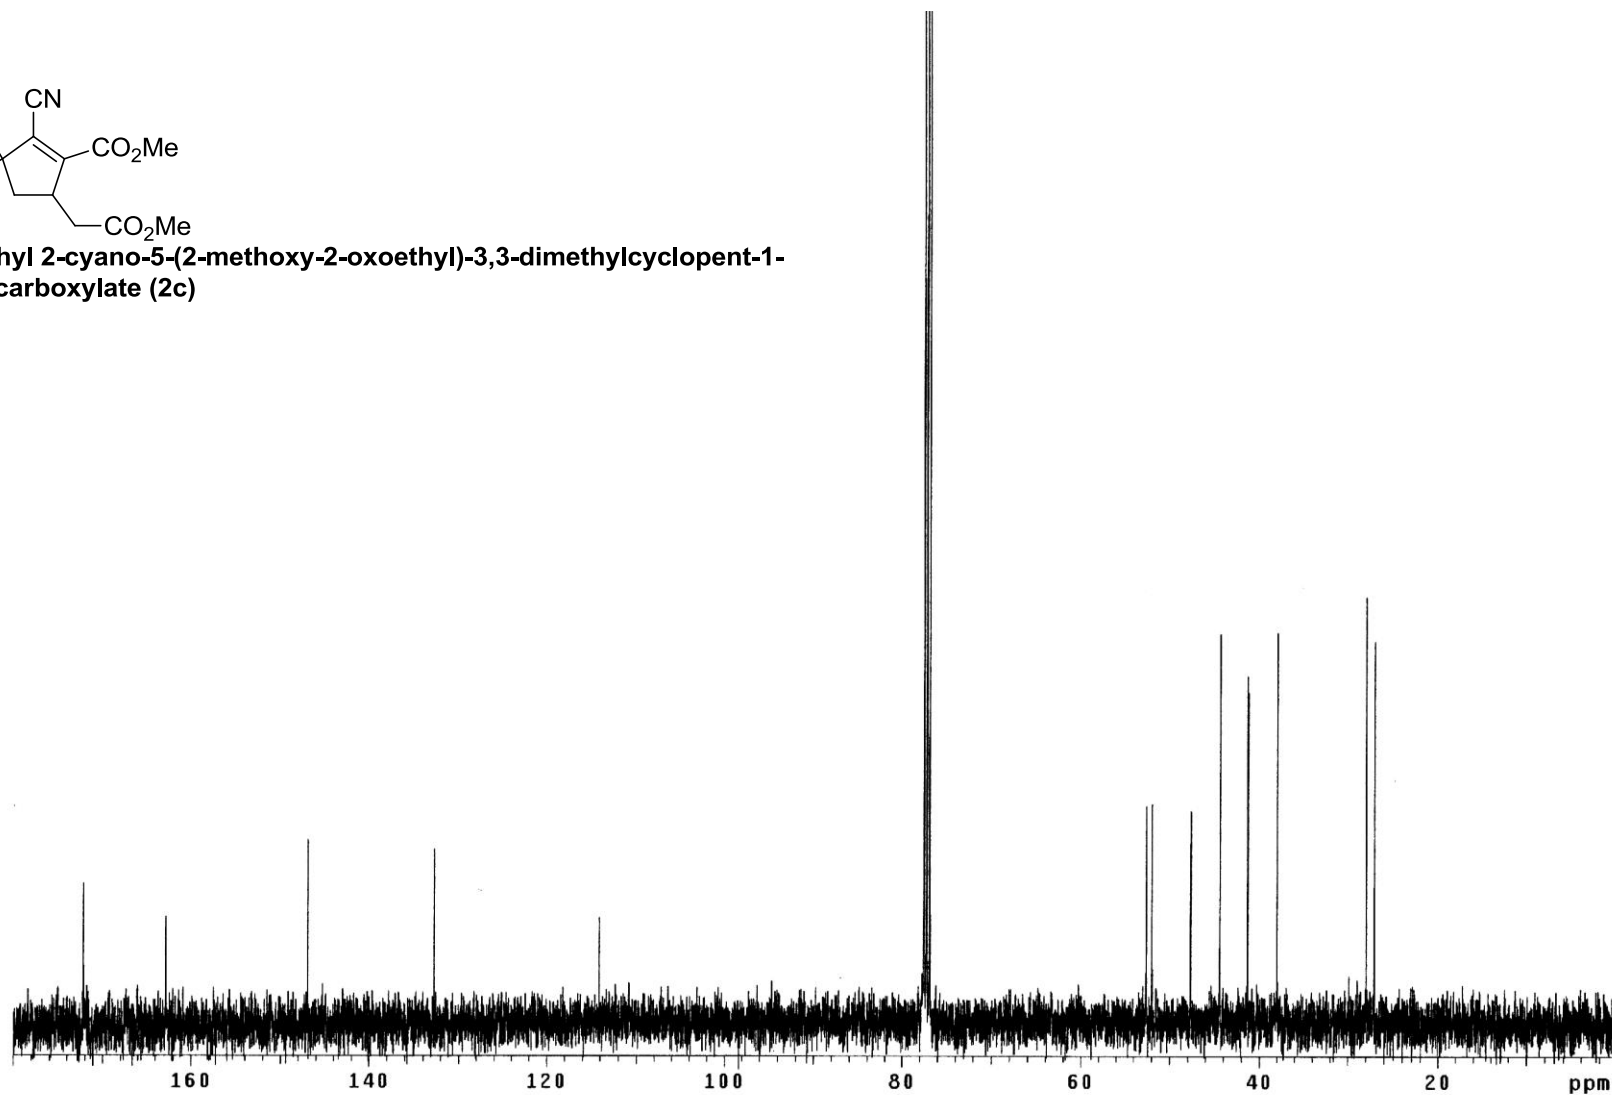

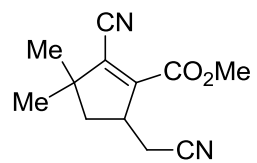

**methyl 2-cyano-5-(cyanomethyl)-3,3-dimethylcyclopent-1-enecarboxylate (2d)**

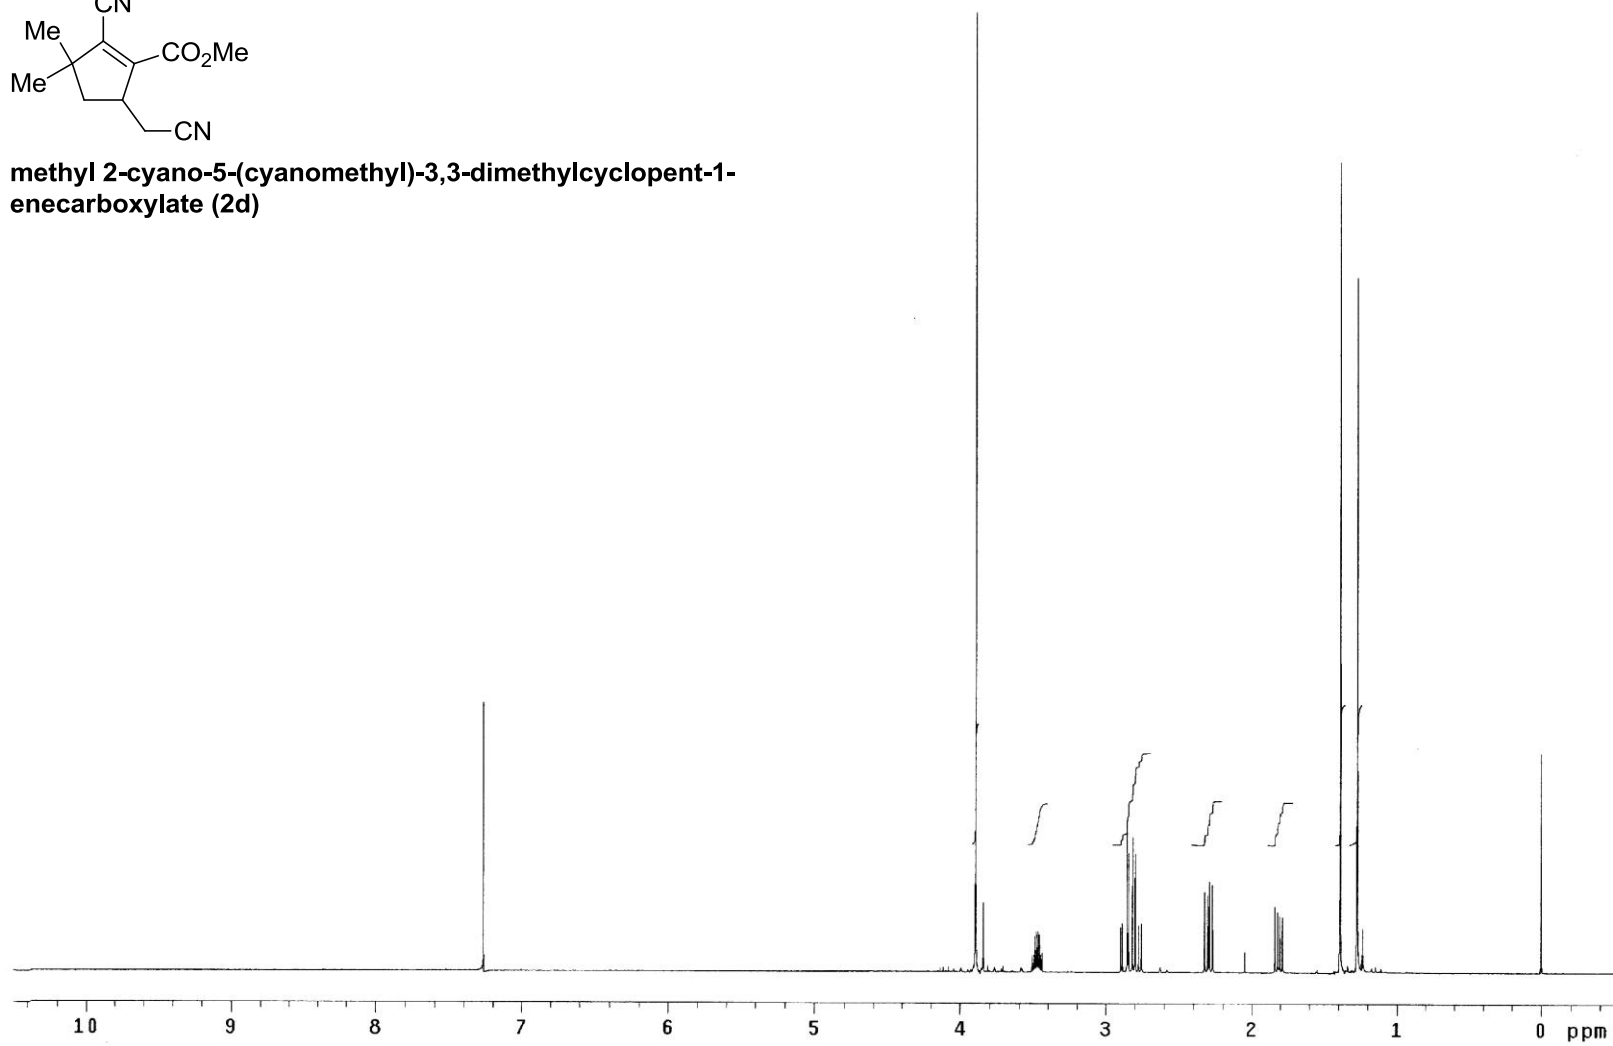

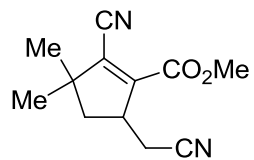

**methyl 2-cyano-5-(cyanomethyl)-3,3-dimethylcyclopent-1-enecarboxylate (2d)**

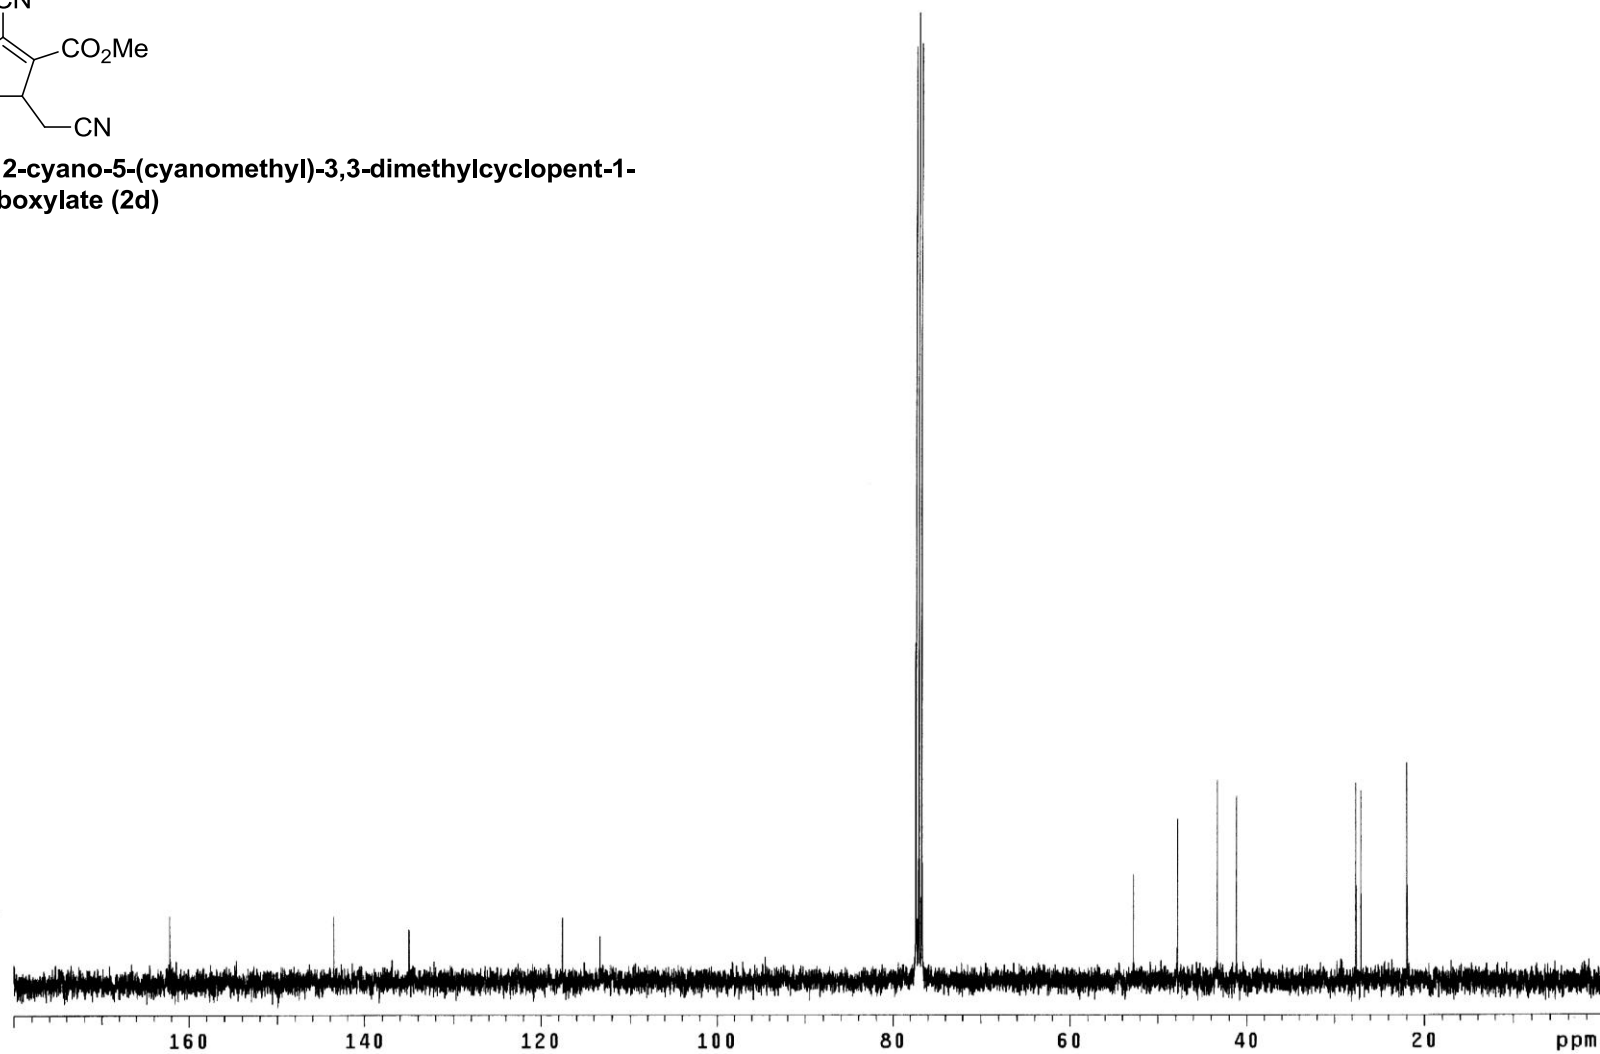

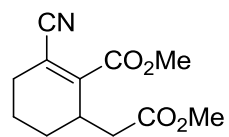

**methyl 2-cyano-6-(2-methoxy-2-oxoethyl)cyclohex-1-enecarboxylate (2f)**

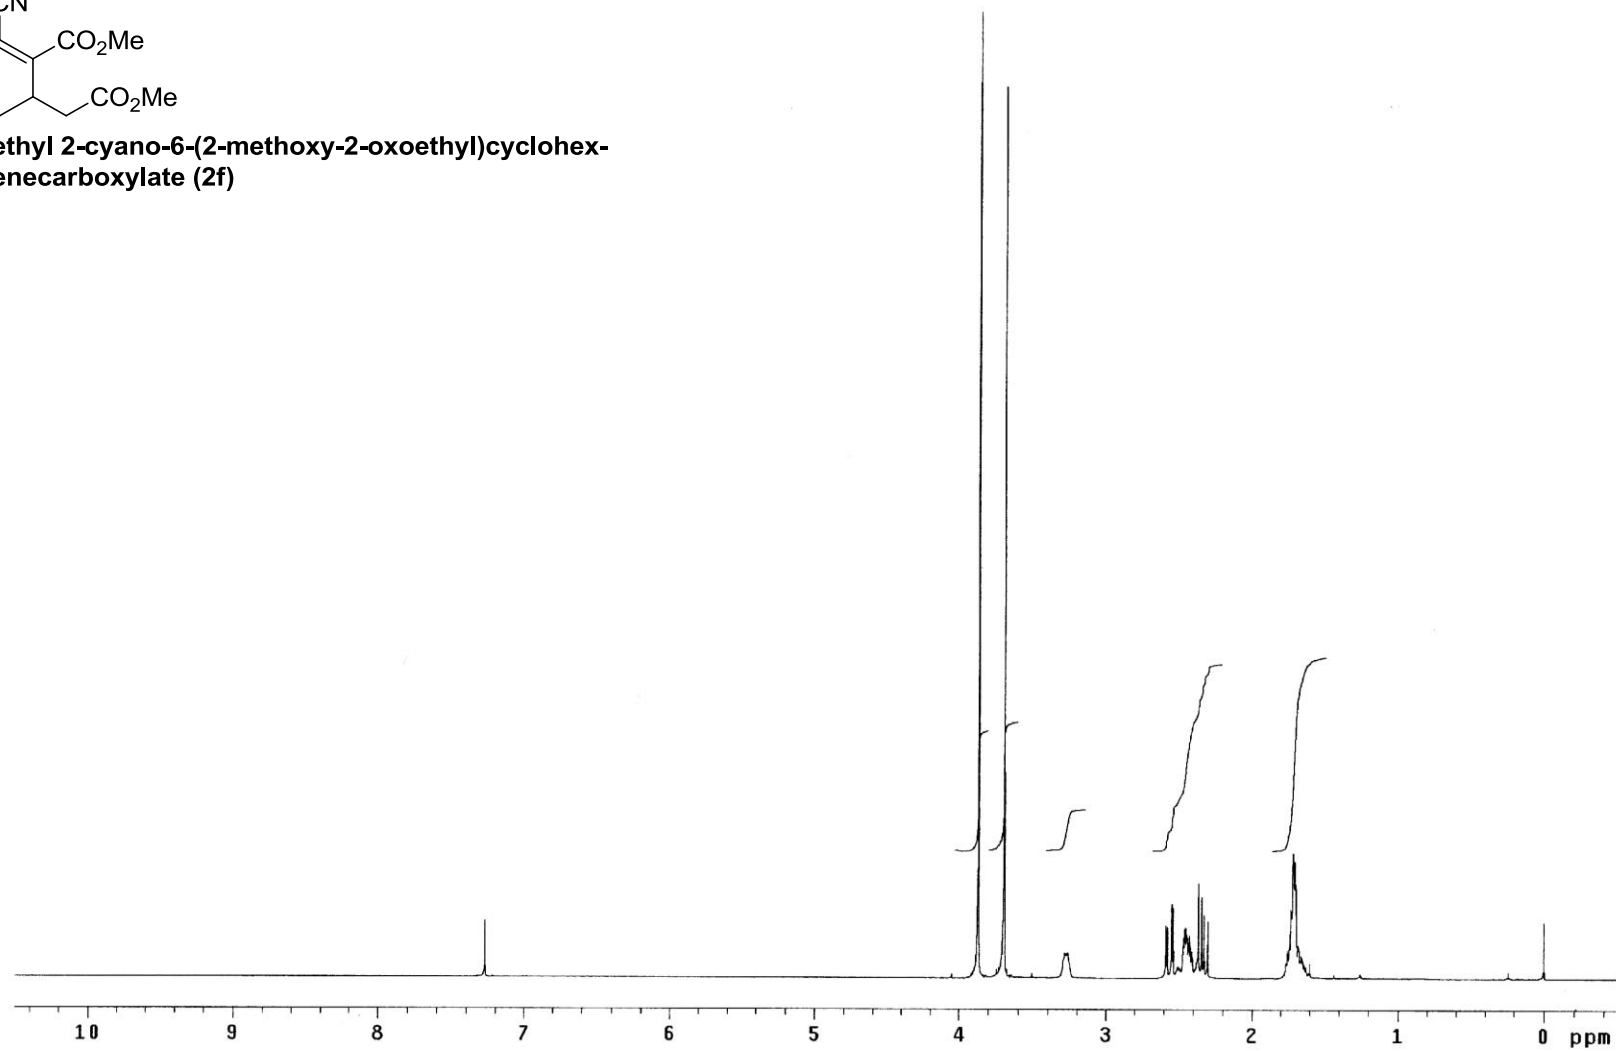

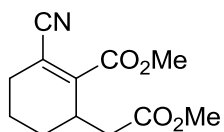

**methyl 2-cyano-6-(2-methoxy-2-oxoethyl)cyclohex-1-enecarboxylate (2f)**

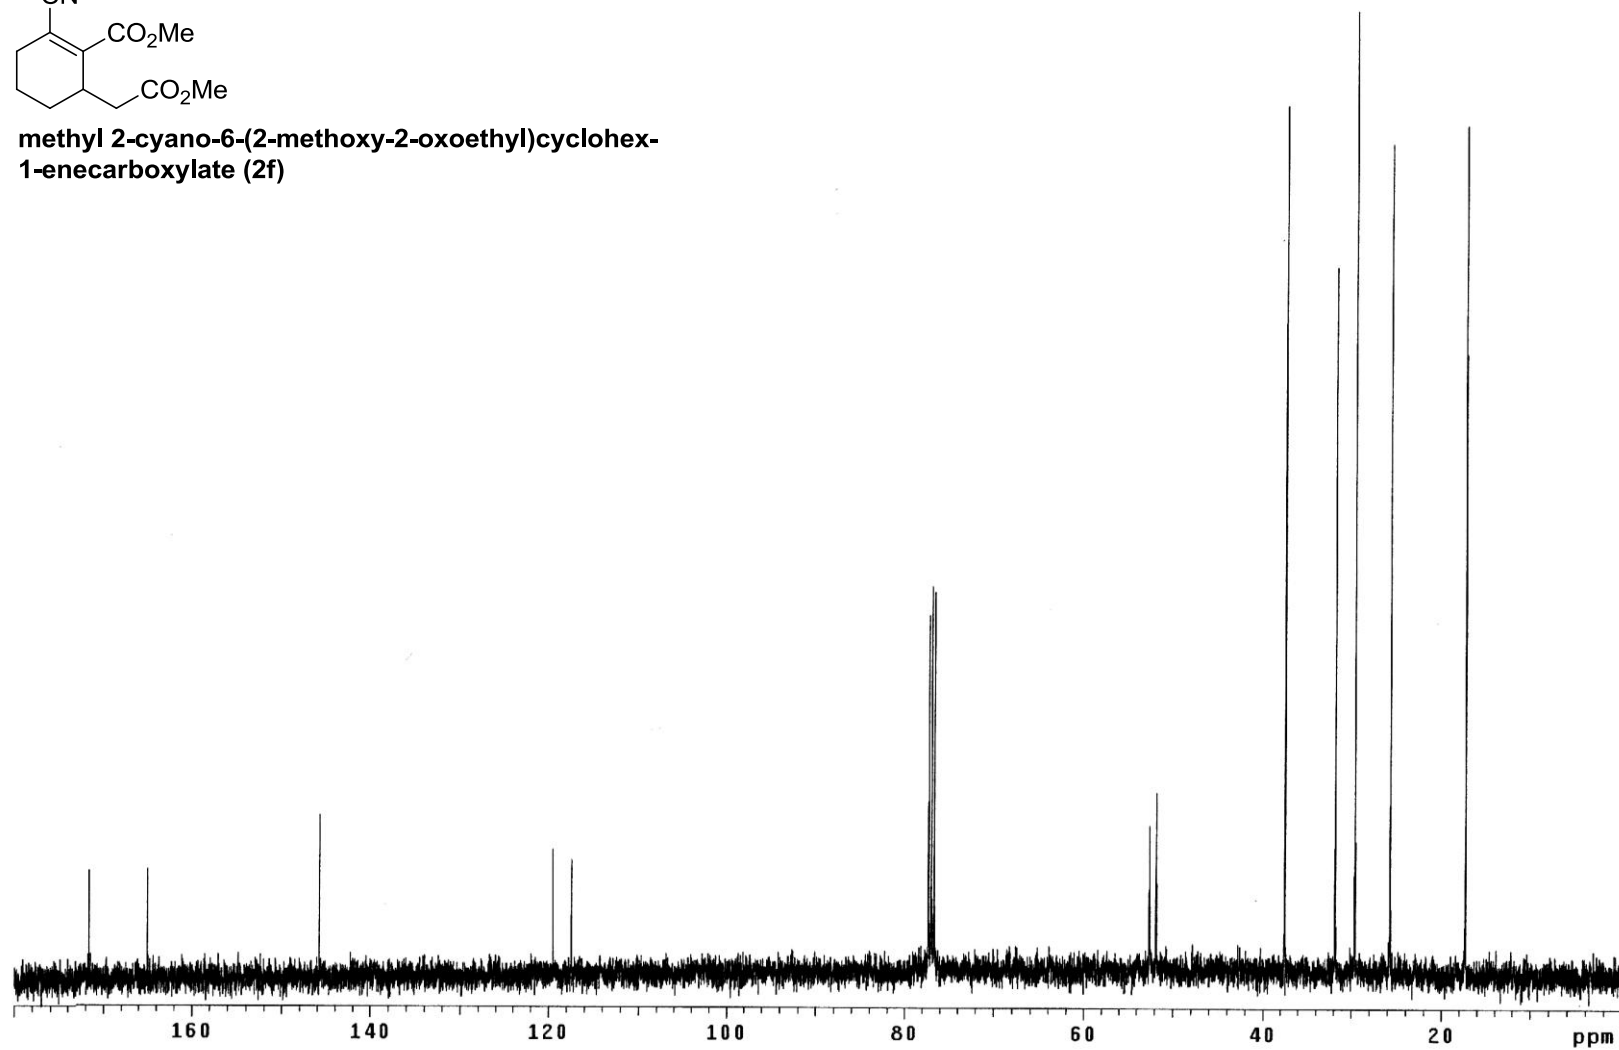

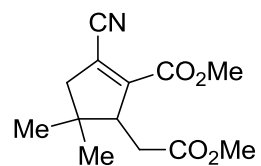

**methyl 2-cyano-5-(2-methoxy-2-oxoethyl)-4,4-dimethylcyclopent-1-enecarboxylate (2g)**

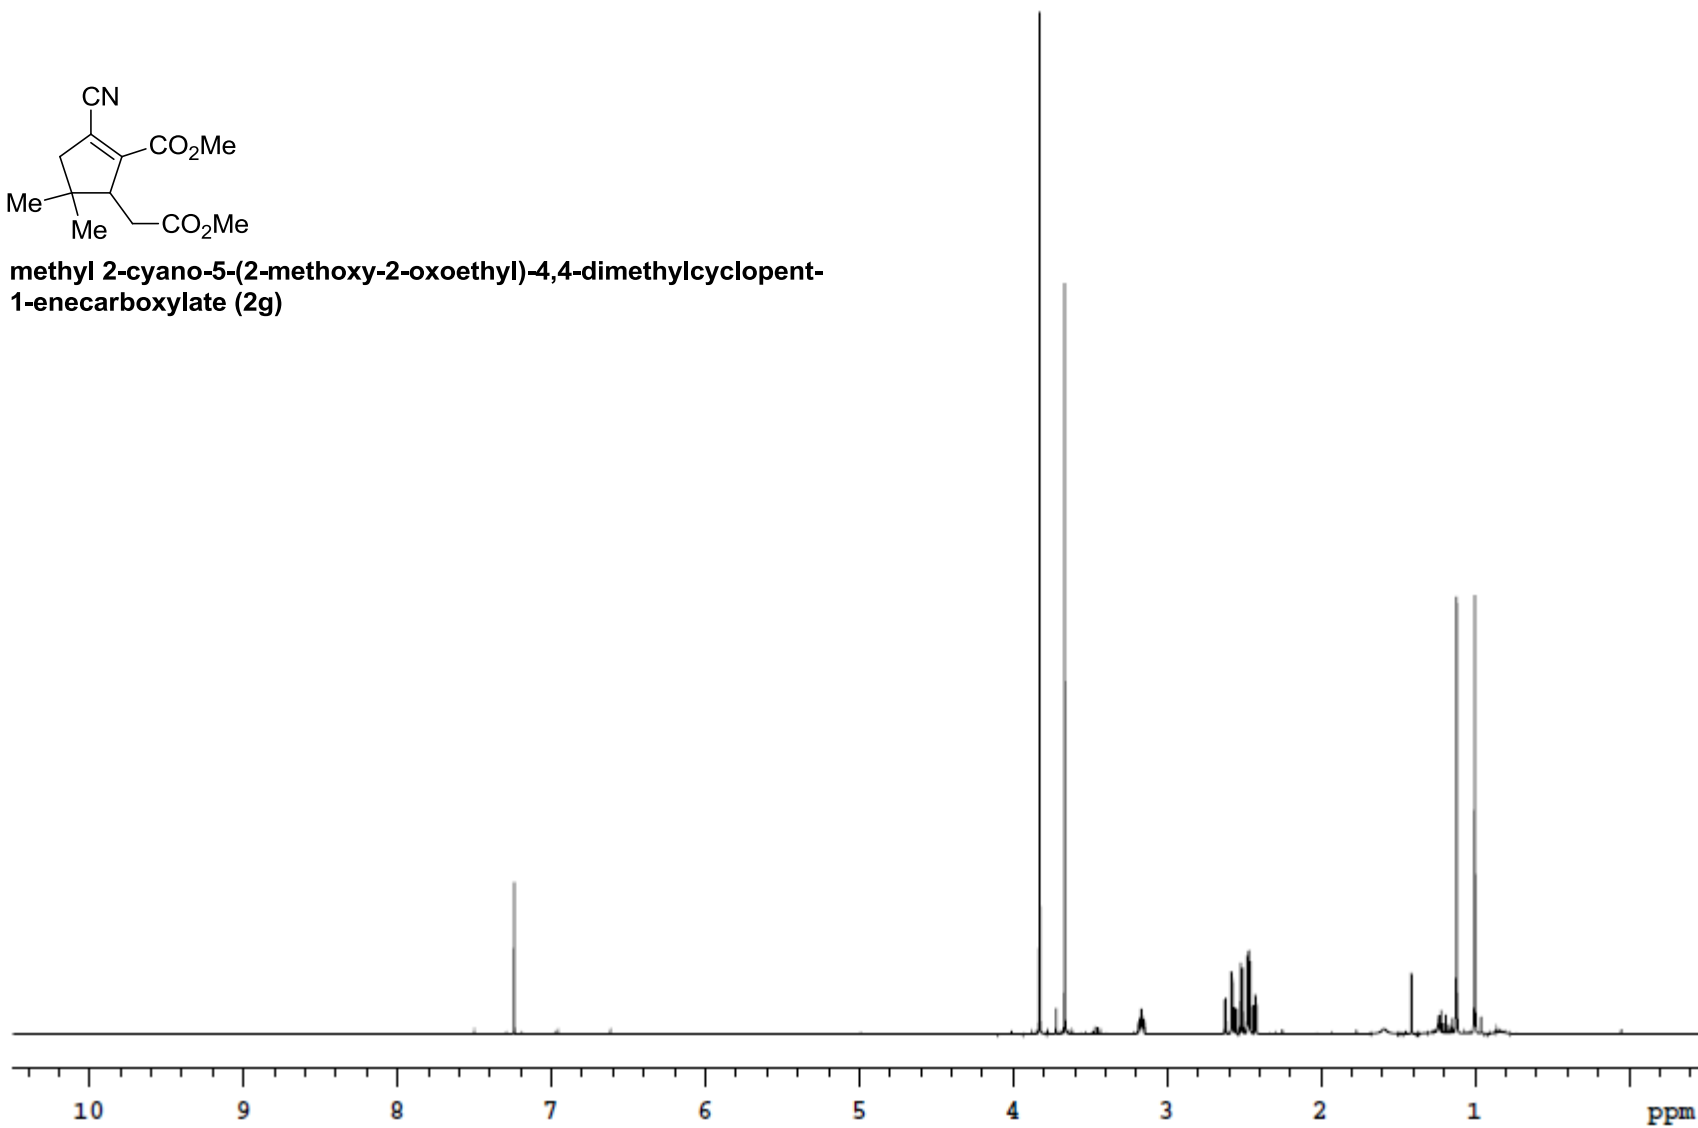



**methyl 2-cyano-5-(2-methoxy-2-oxoethyl)-4,4-dimethylcyclopent-1-enecarboxylate (2g)**

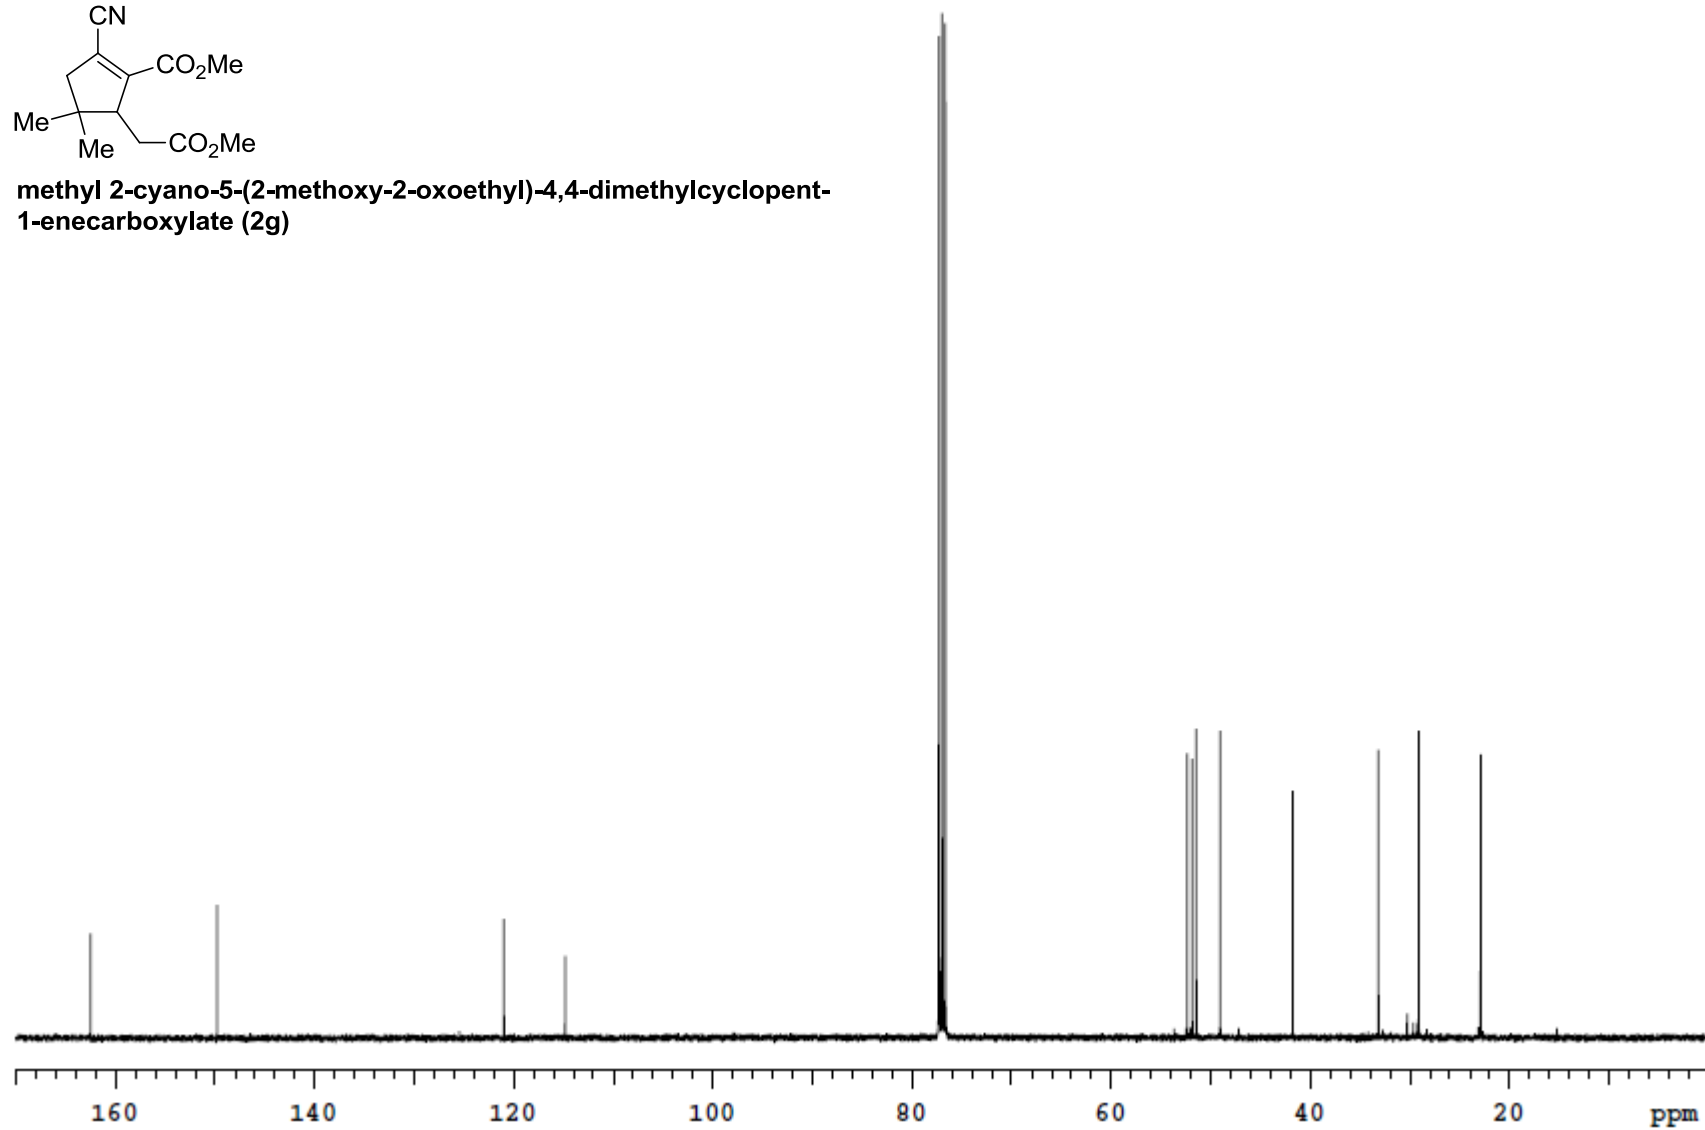



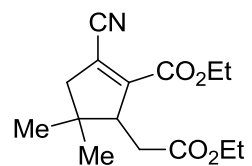

**ethyl 2-cyano-5-(2-ethoxy-2-oxoethyl)-4,4-dimethylcyclopent-1-enecarboxylate (2h)**

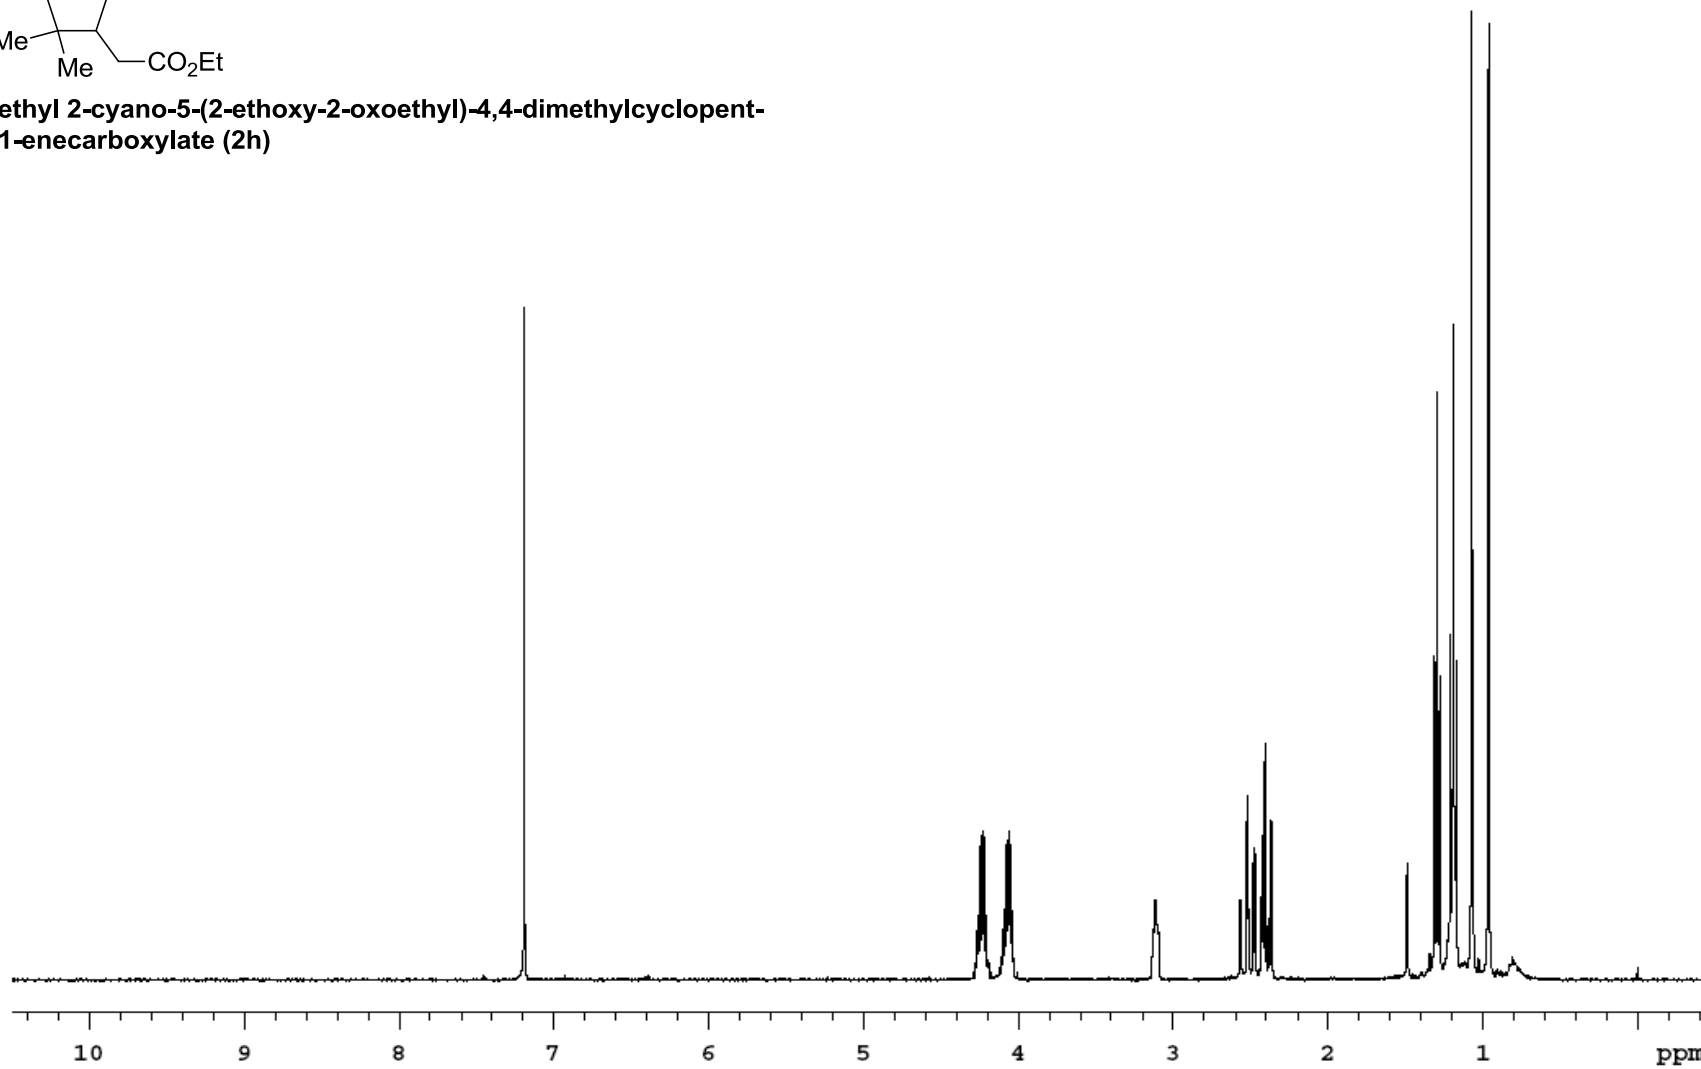

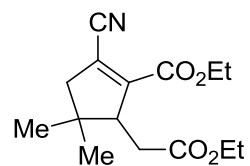

**ethyl 2-cyano-5-(2-ethoxy-2-oxoethyl)-4,4-dimethylcyclopent-1-enecarboxylate (2h)**

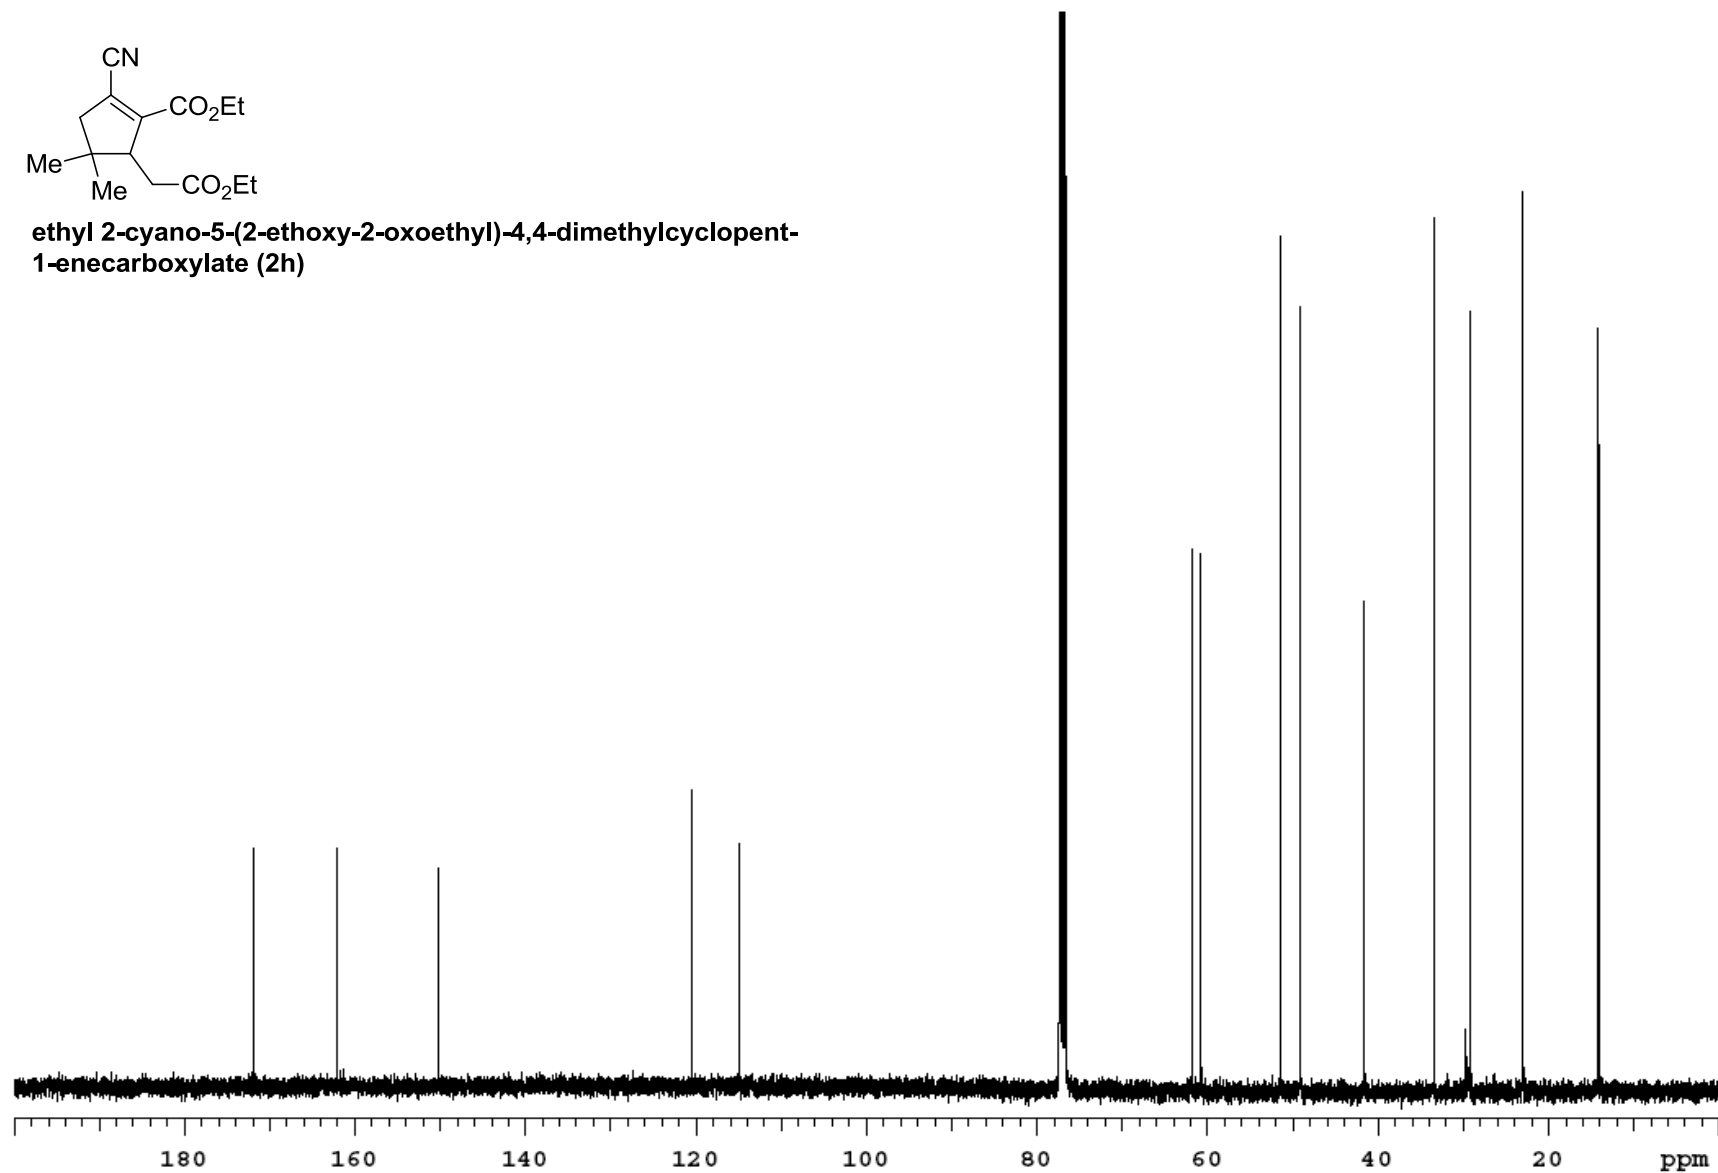

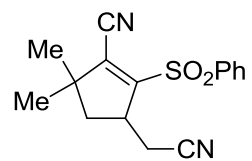

**3-(cyanomethyl)-5,5-dimethyl-2-(phenylsulfonyl)cyclopent-1-enecarbonitrile (2i)**

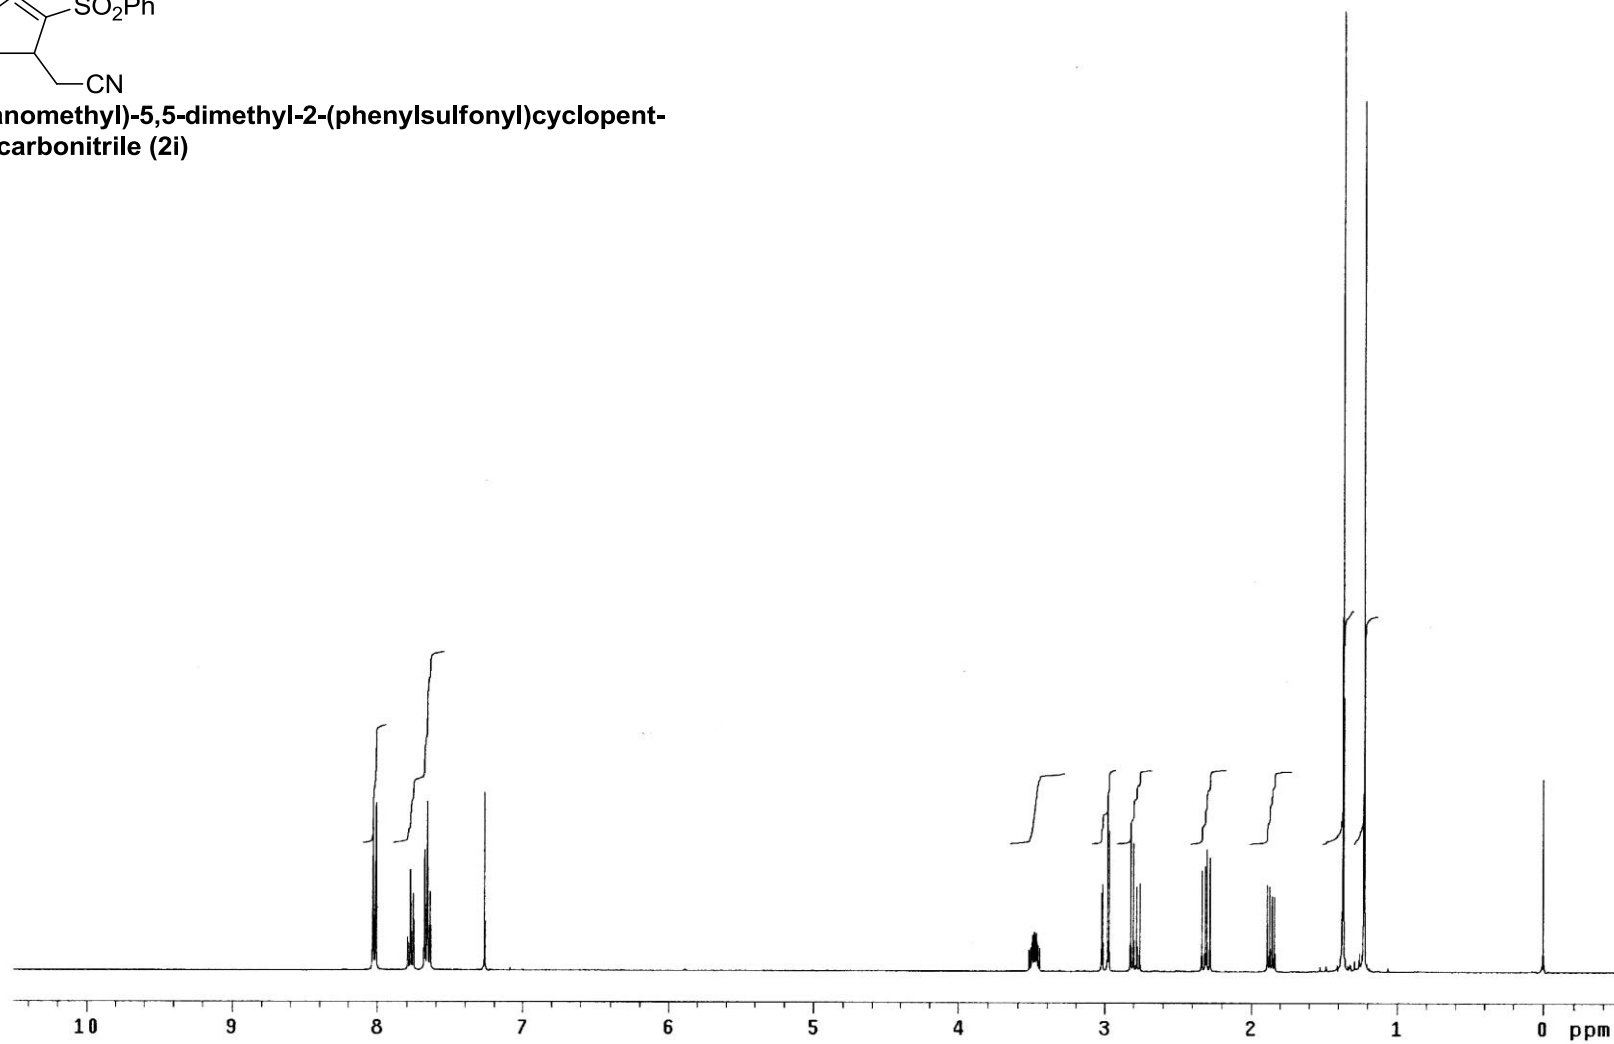

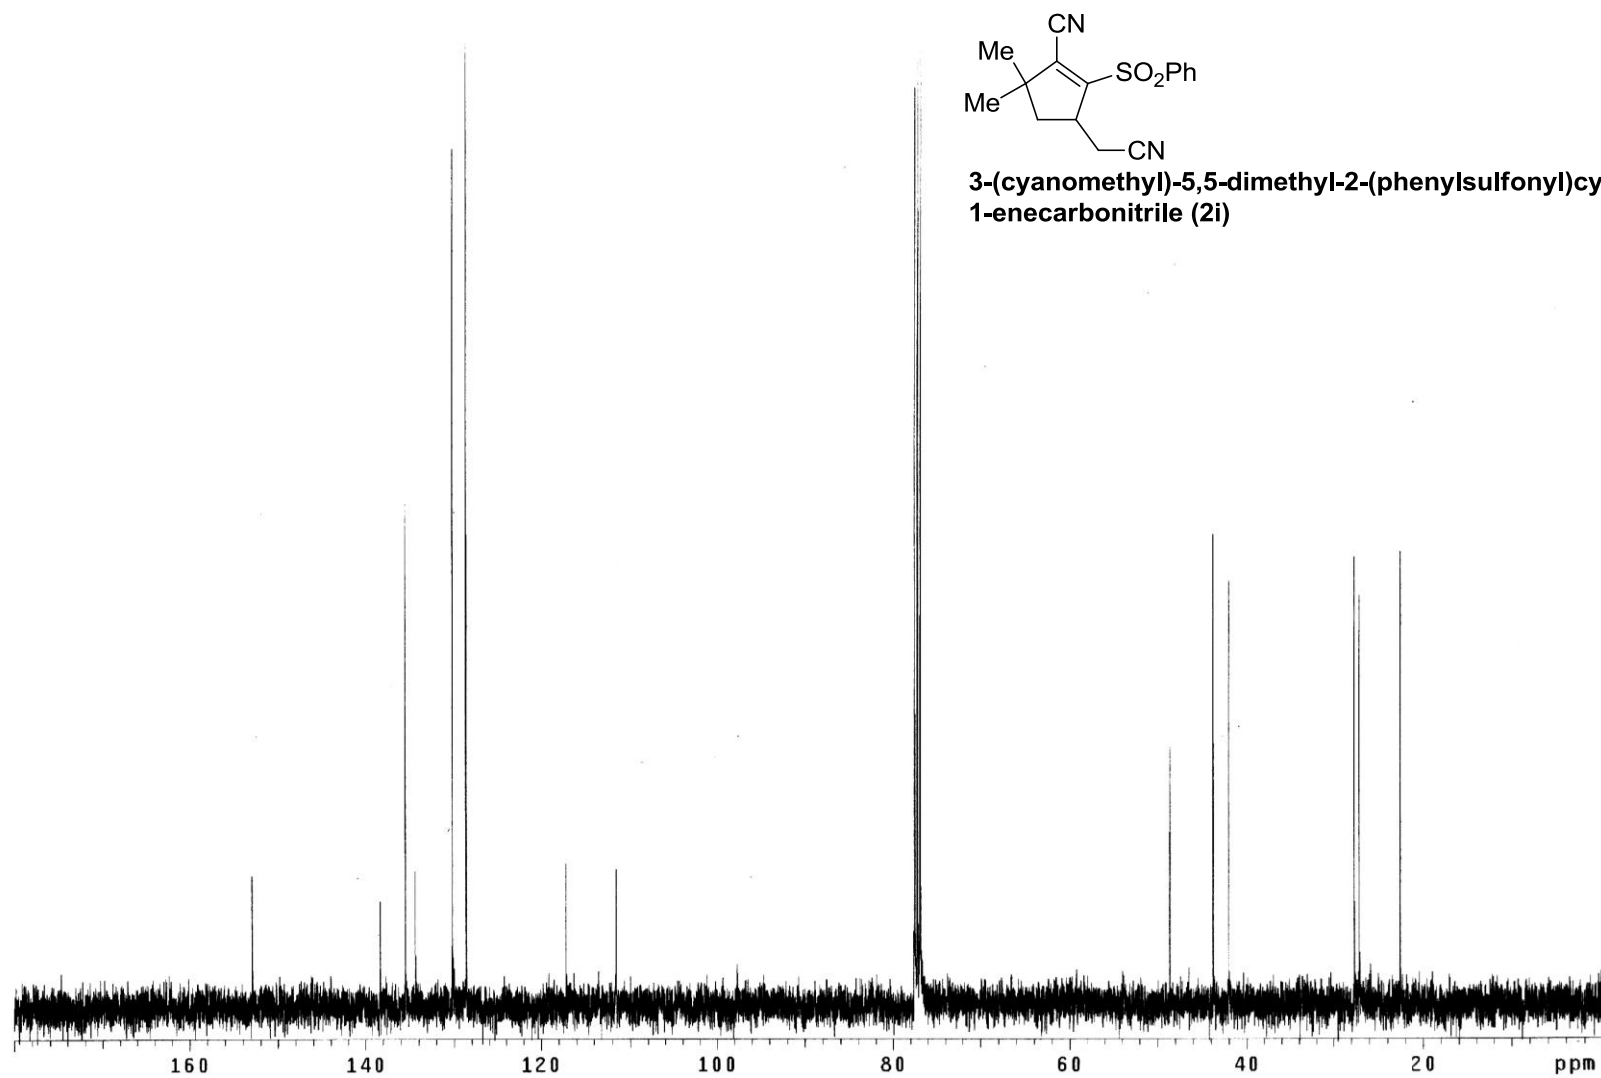

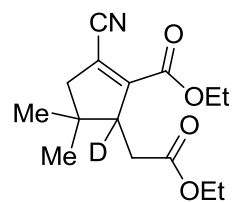

**Ethyl 2-cyano-5-(2-ethoxy-2-oxoethyl)-4,4-dimethylcyclopent-1-enecarboxylate-(5-d1) (11)**

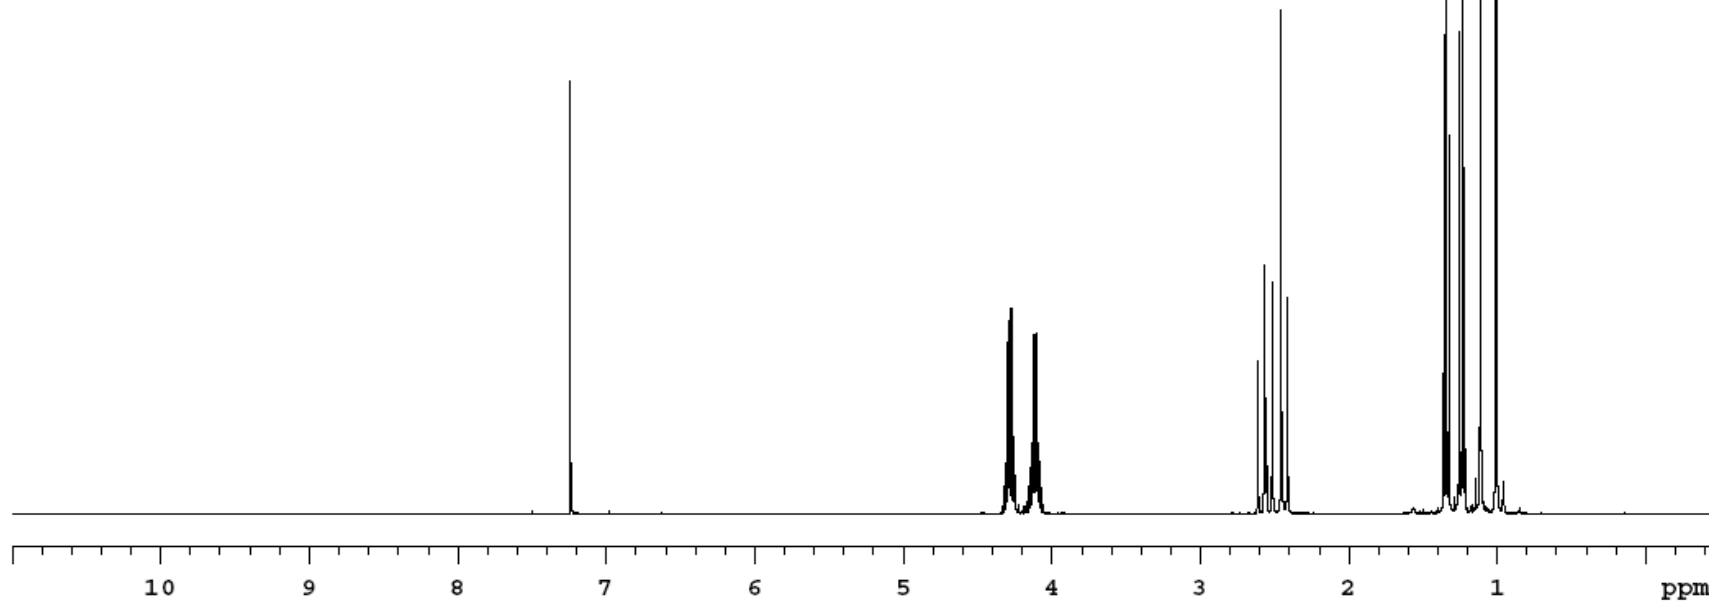

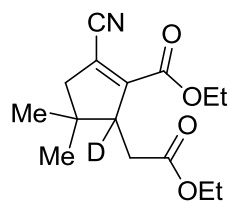

**Ethyl 2-cyano-5-(2-ethoxy-2-oxoethyl)-4,4-dimethylcyclopent-1-enecarboxylate-(5-d1) (11)**

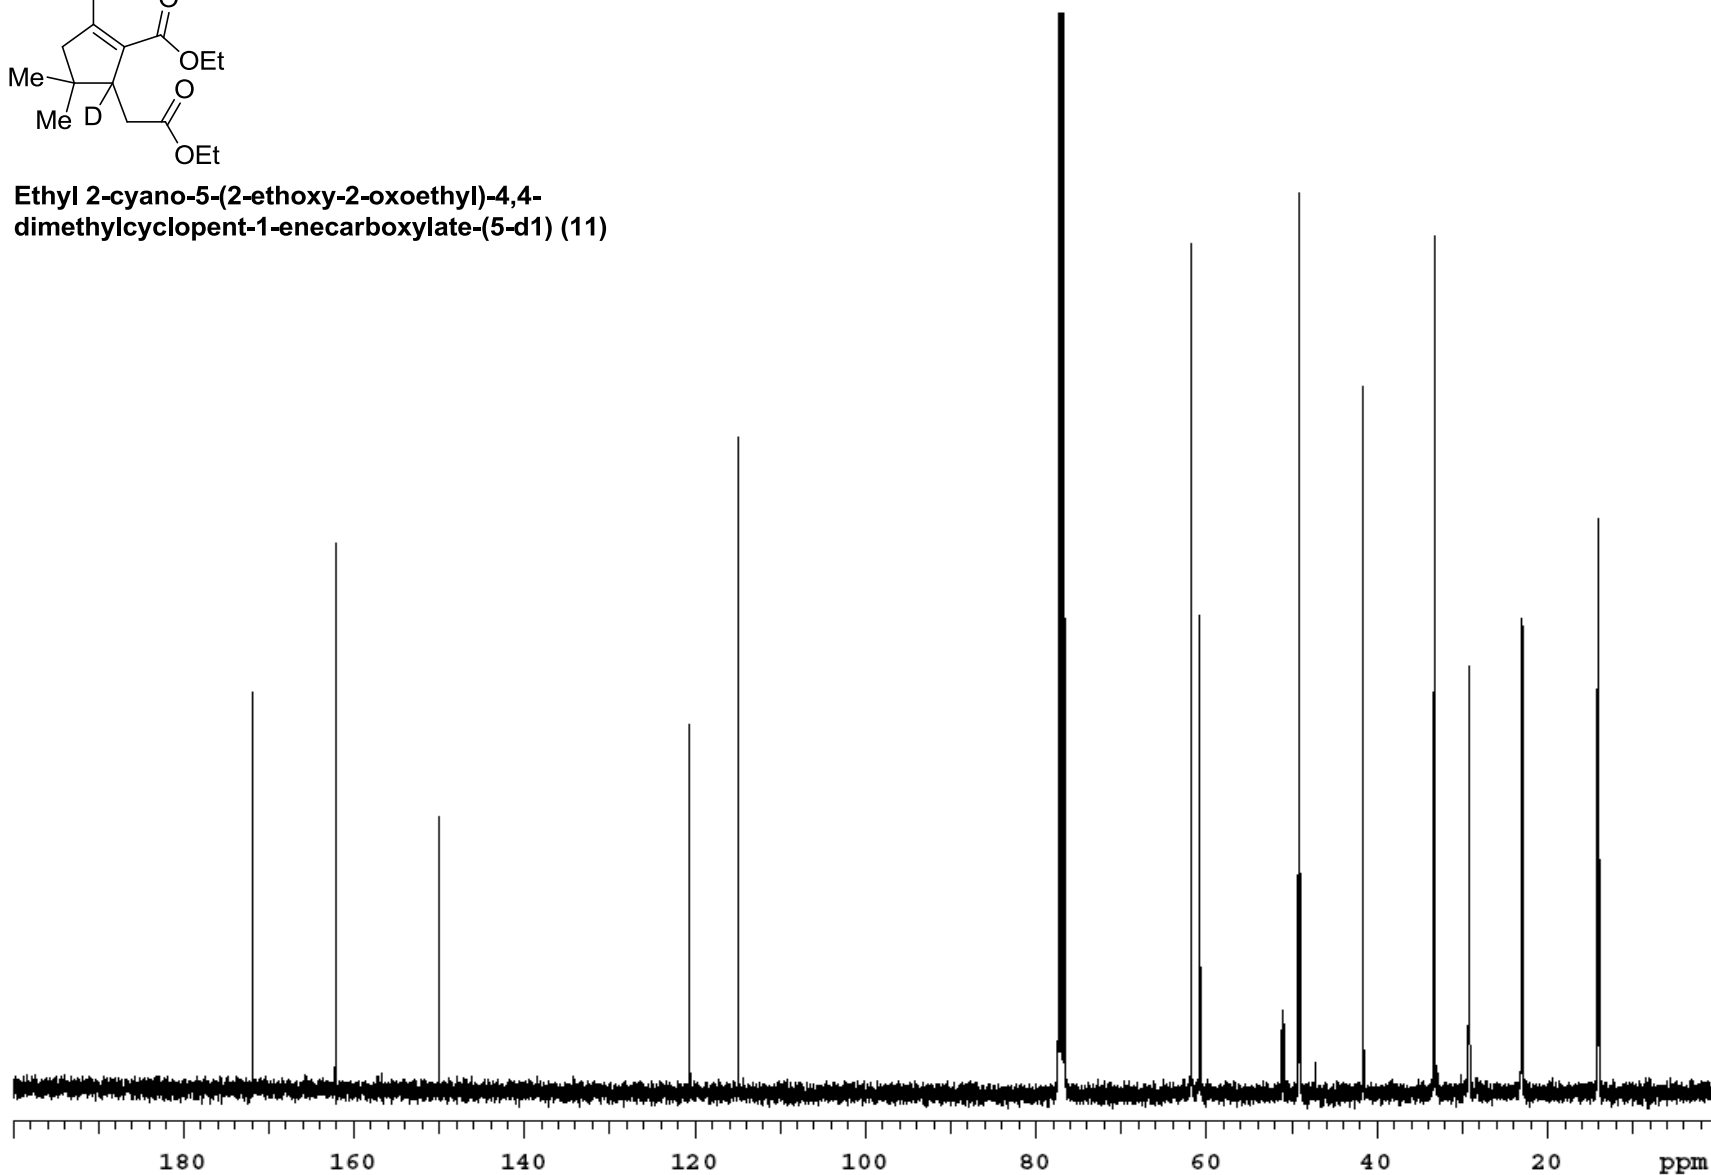

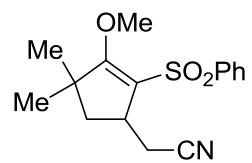

**(2-Benzenesulfonyl-3-methoxy-4,4-dimethylcyclopent-2-enyl)acetonitrile (8)**

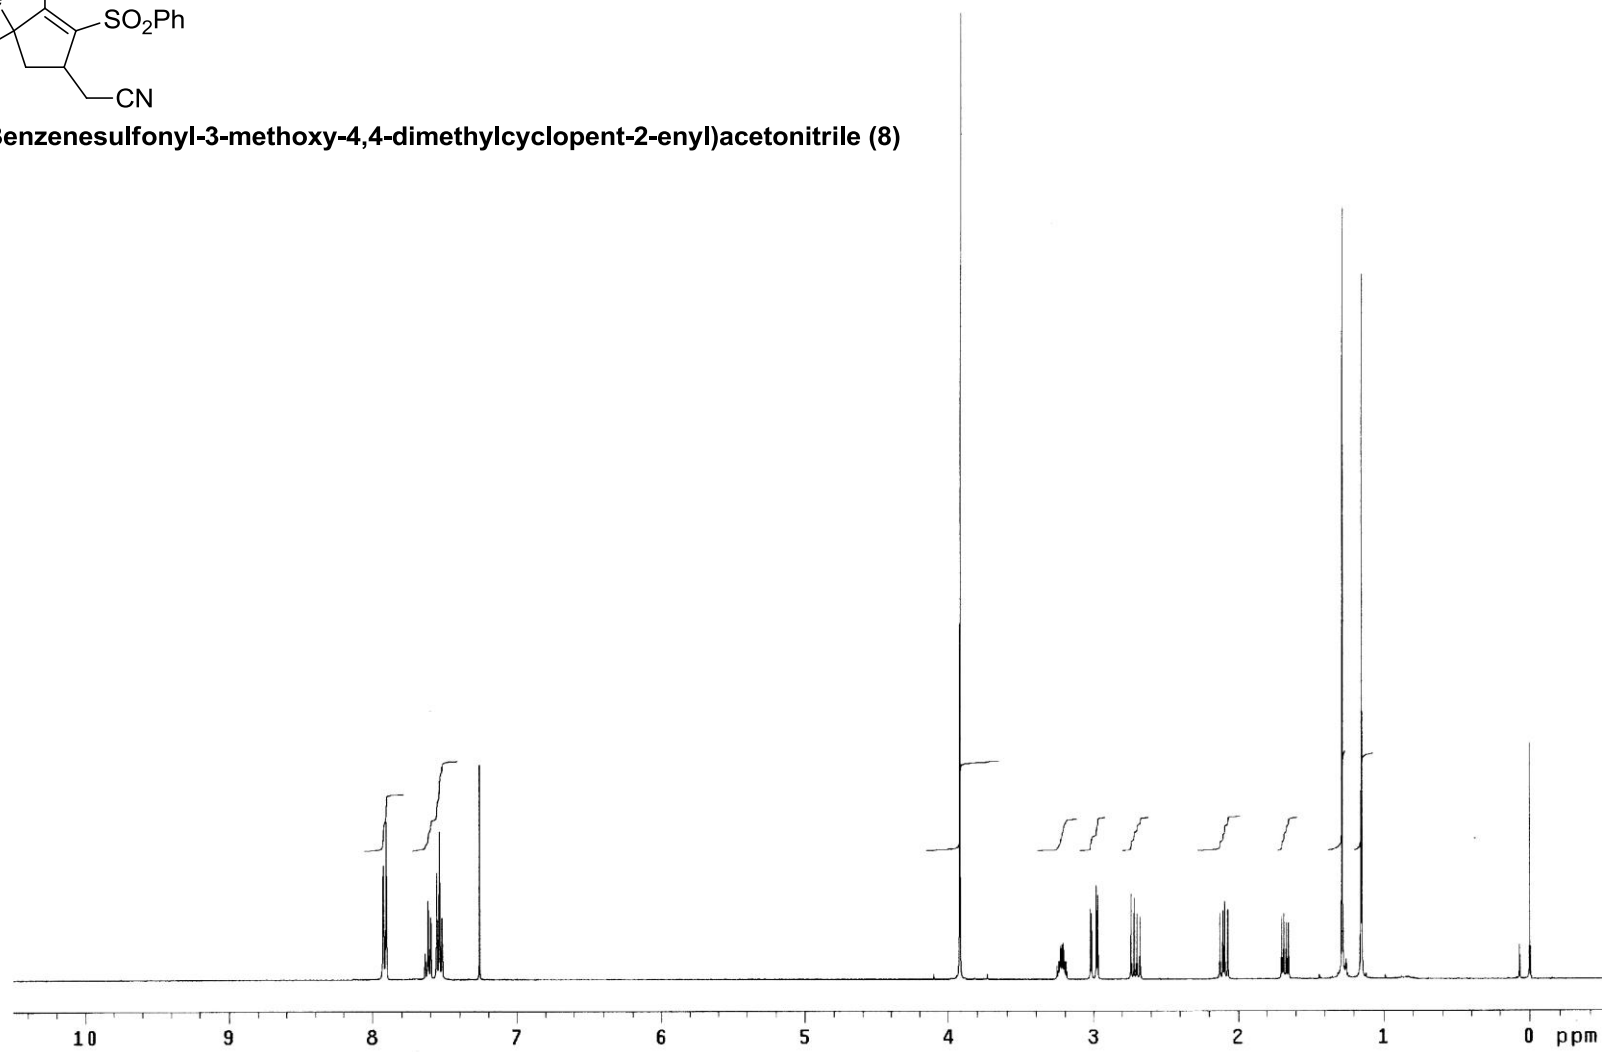

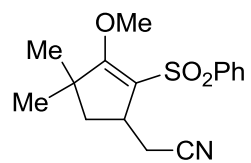

**(2-Benzenesulfonyl-3-methoxy-4,4-dimethylcyclopent-2-enyl)acetonitrile (8)**

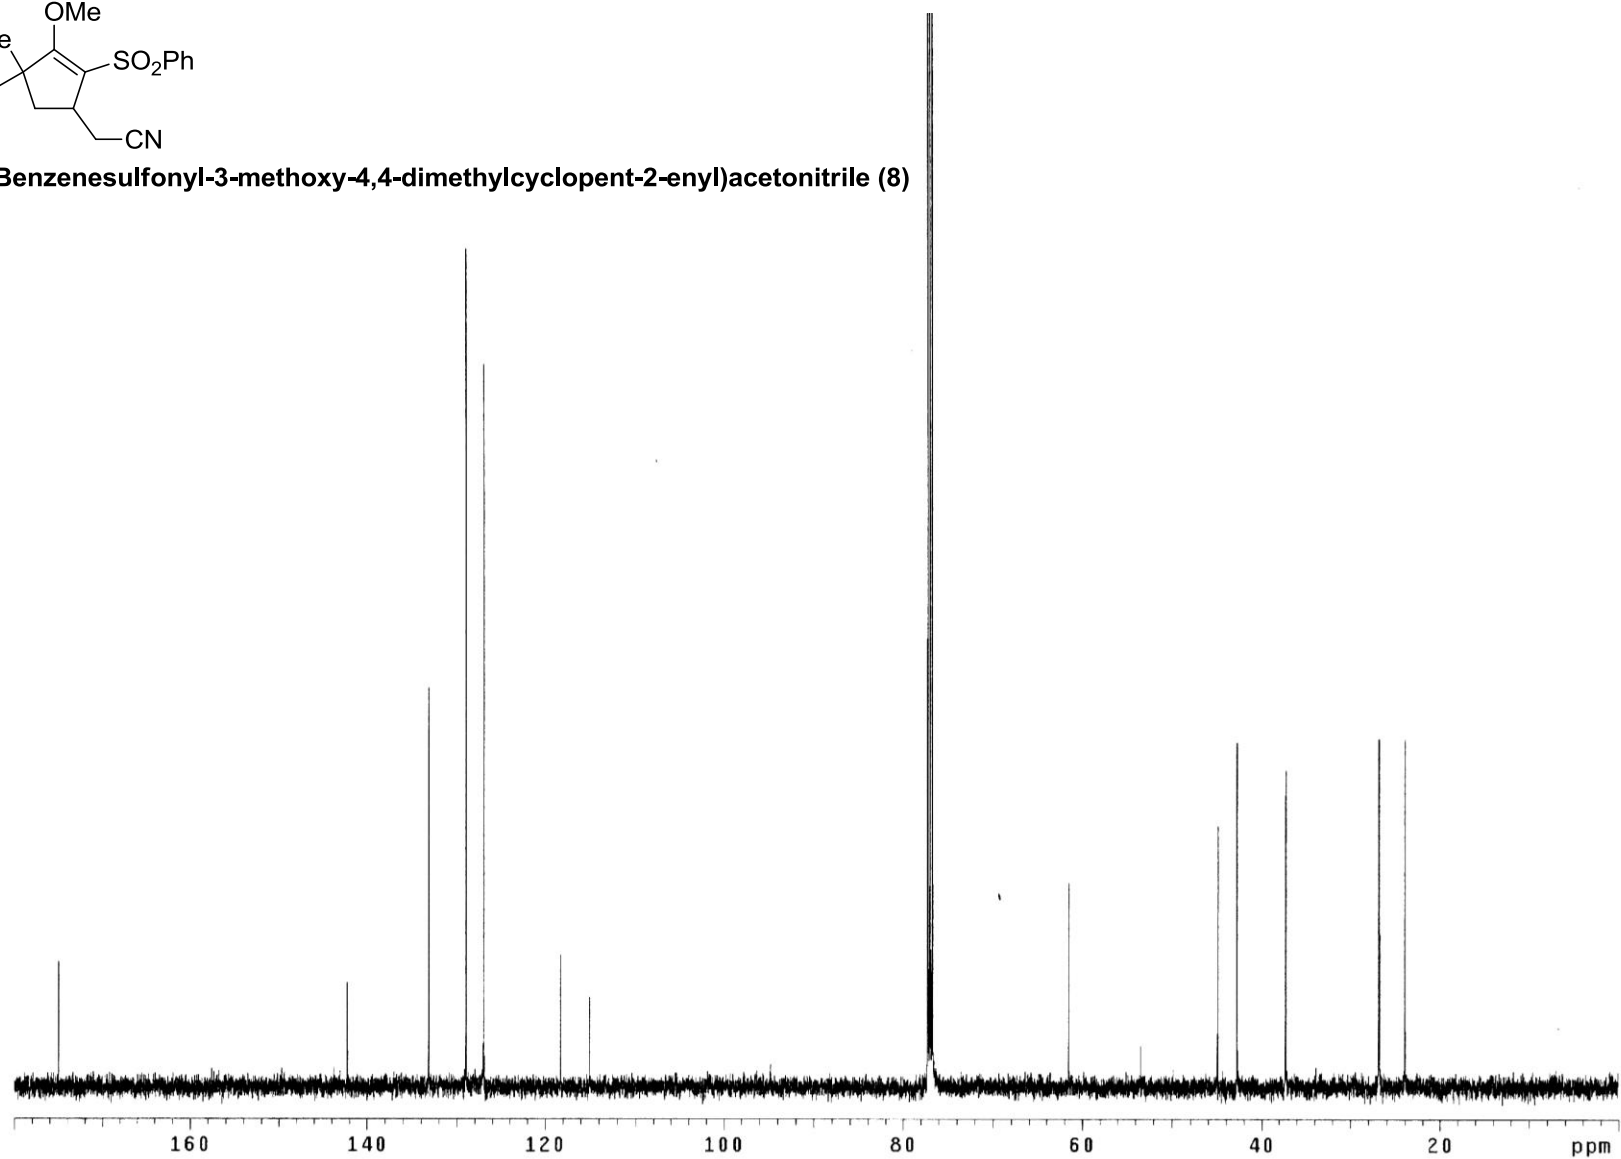



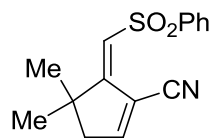

**(Z)-4,4-dimethyl-5-((phenylsulfonyl)methylene)cyclopent-1-enecarbonitrile**

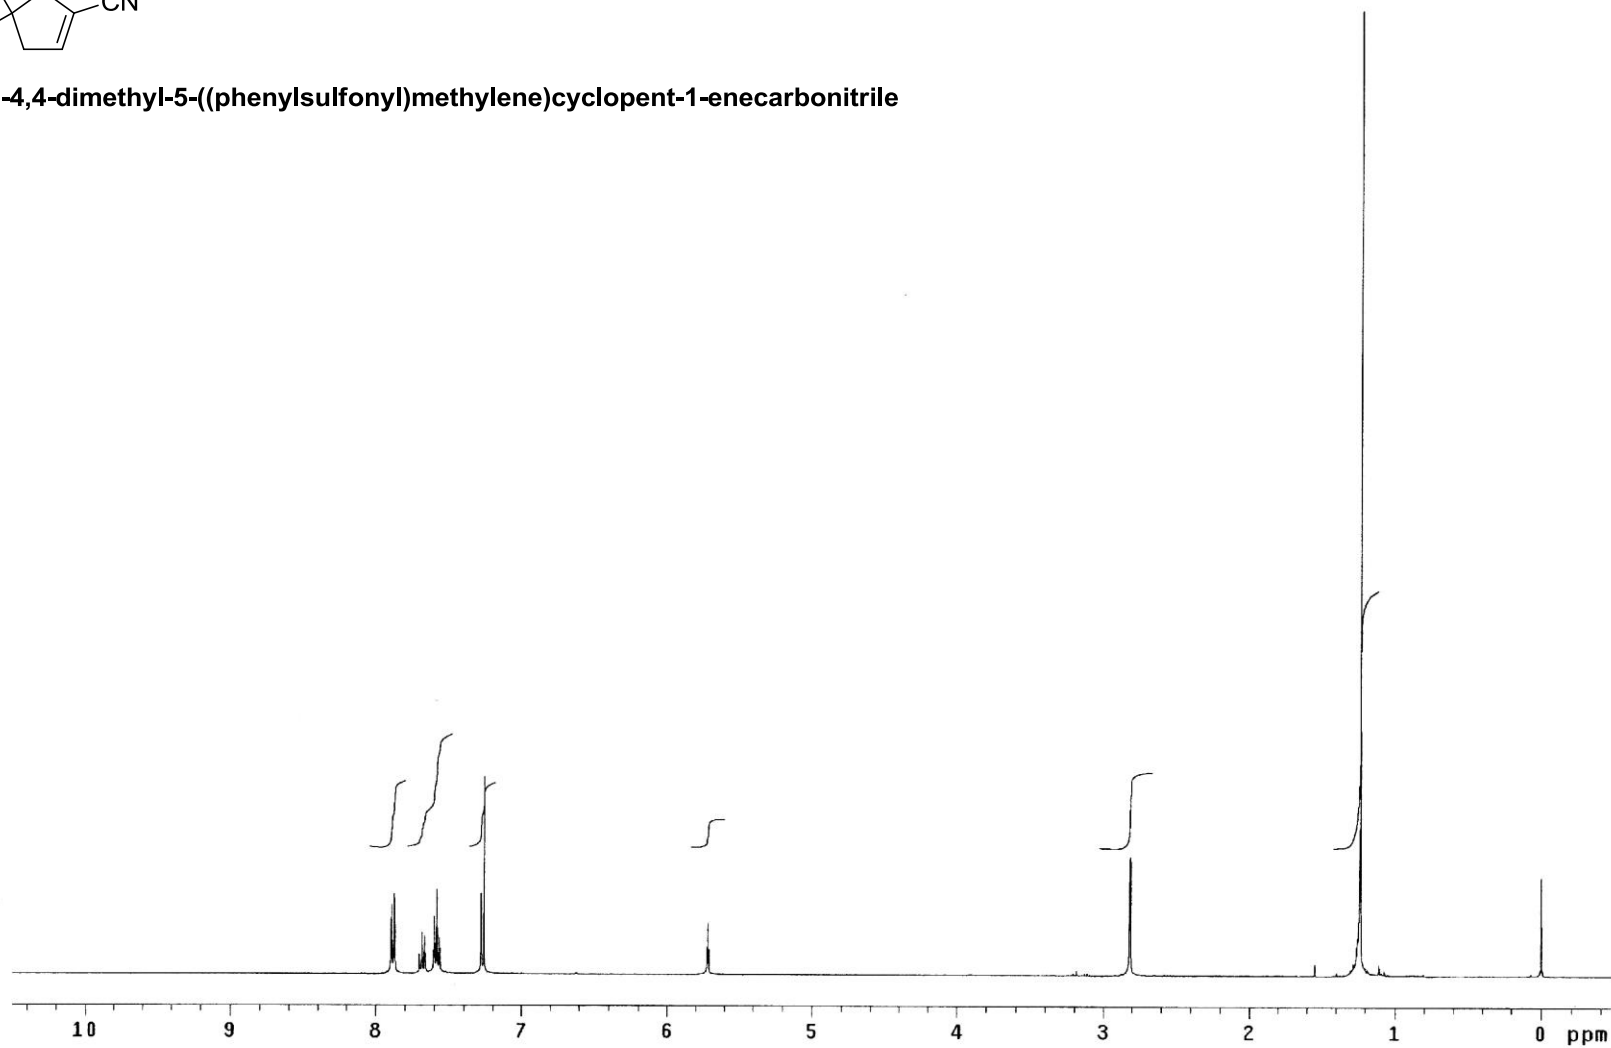

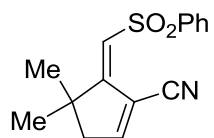

**(Z)-4,4-dimethyl-5-((phenylsulfonyl)methylene)cyclopent-1-enecarbonitrile**

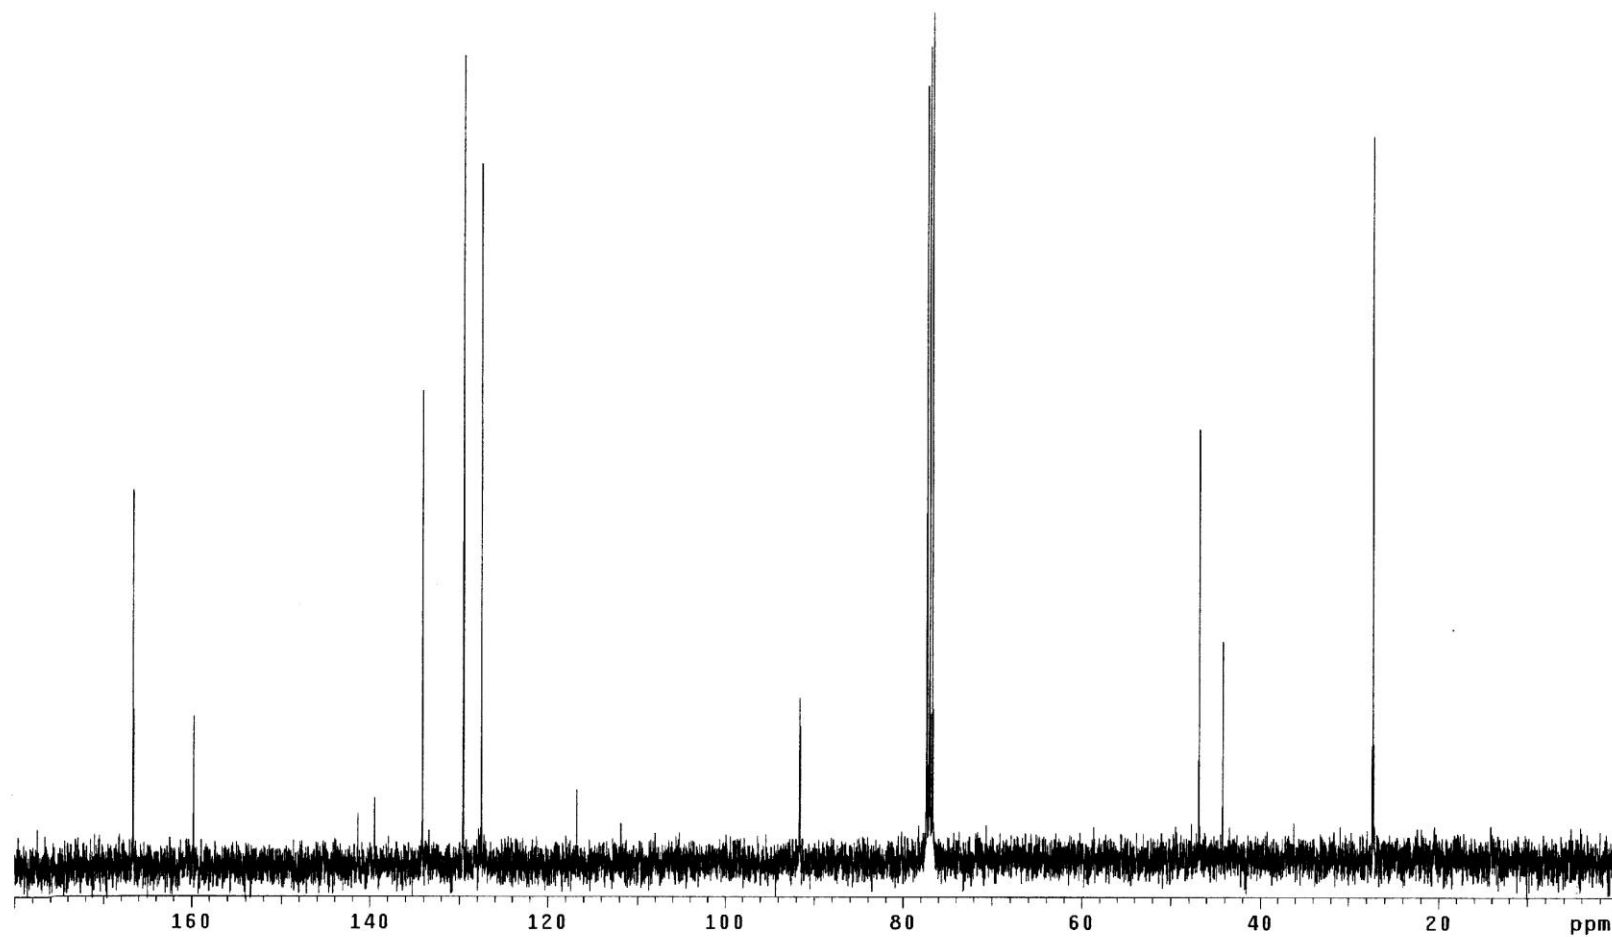

Supplement: Supplementary file 1 [file 4132219]
